# Supplementary material
Source: JCI journal article supplement (doi:10.1172/jci186461)
Supplement: sd1 [file 1]

# Supplemental material

## **Differential Effects of HDAC8 Targeting on Foxp3+ T-regulatory Cells and Effector T-Cells Promote Anti-tumor Immunity**

Fanhua Kong,<sup>1,6</sup> Yan Xiong,<sup>1</sup> Liqing Wang,<sup>2</sup> Rongxiang Han,<sup>2</sup> Hossein Fazelinia,<sup>3</sup> Jennifer Roof,<sup>3</sup> Lynn Spruce,<sup>3</sup> Aaron B. Beeler,<sup>4</sup> Wayne W. Hancock<sup>2,5\*</sup>

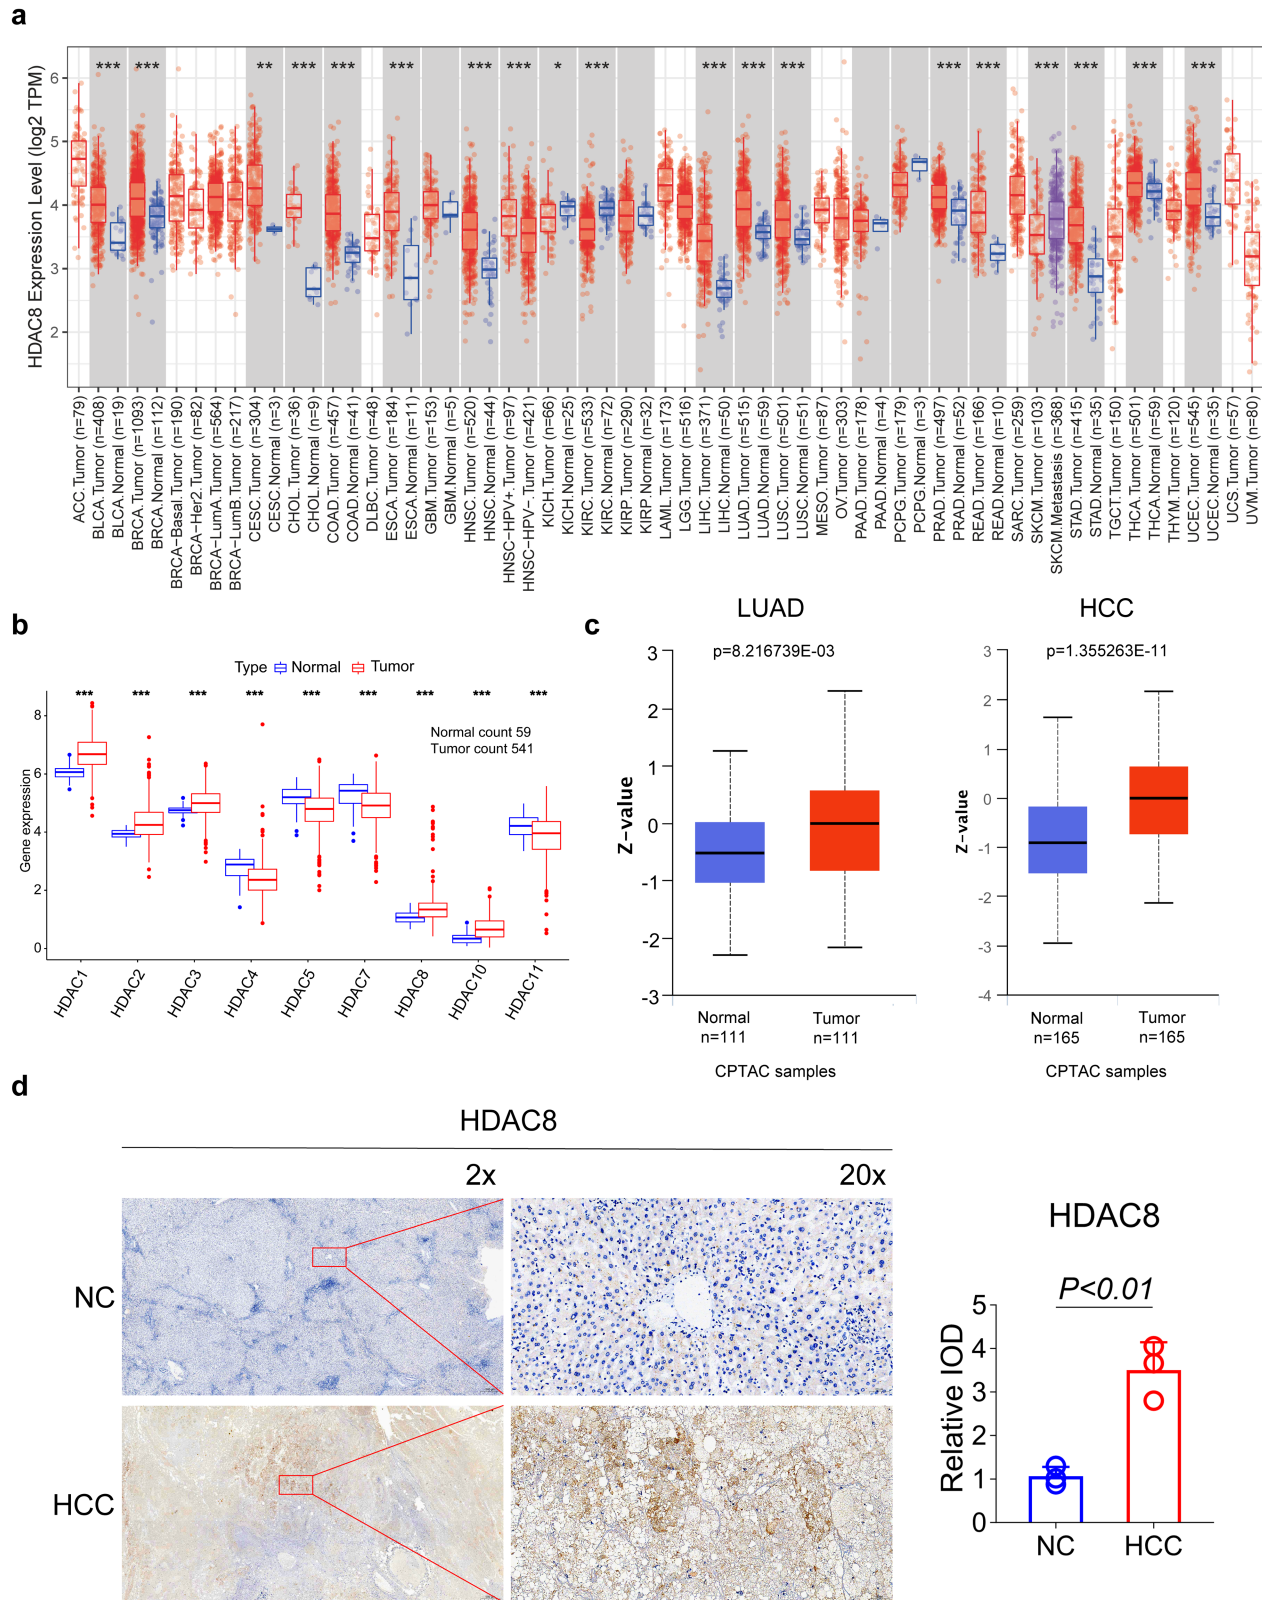

**Fig. S1:** HDAC8 expression is upregulated in human solid tumors. (a) TIMER2 was used to analyze the expression of the HDAC8 gene in different cancers or specific cancer subtypes. (b) TCGA database was used to analyze the expression levels of HDAC family genes in LUAD. (c) CPTAC module of UALCAN database was used to analyze the expression differences of HDAC8 between LUAD, HCC and normal tissues. (d)

Immunohistochemical analysis of HDAC8 in HCC and peri-cancerous tissues. Statistical analysis involved comparisons between two groups using a two-tailed Student's t-test for normally distributed data.

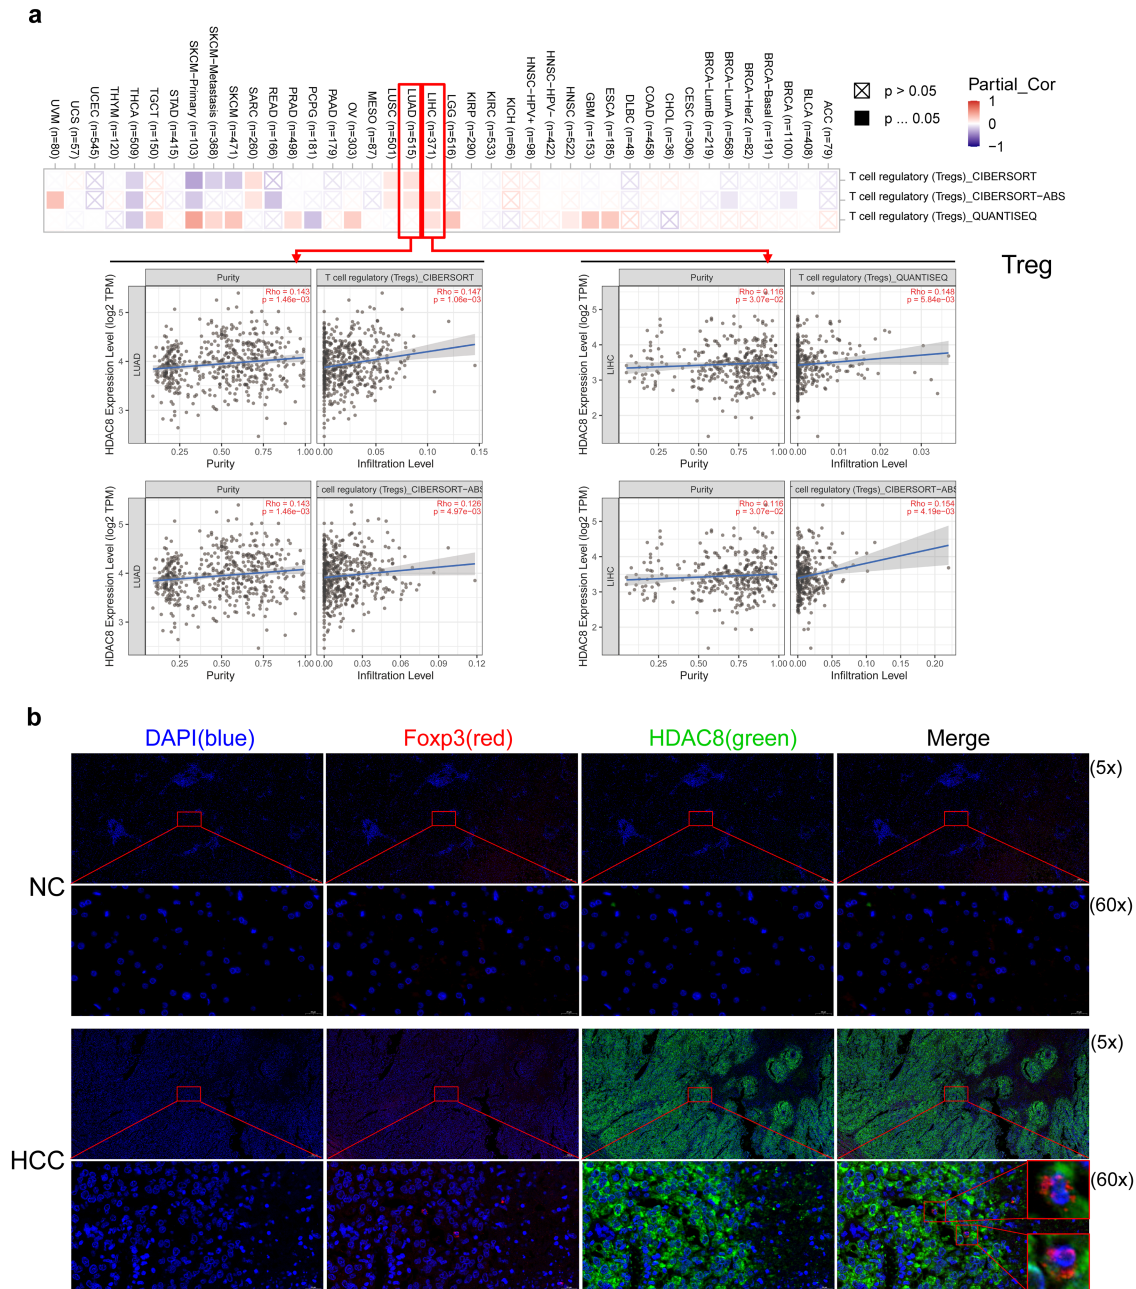

**Fig. S2:** HDAC8 promotes Treg infiltration in human solid tumors. (a) TIMER2 database was used to analyze the correlation between immune infiltration of Treg and HDAC8 expression. We used different algorithms to analyze the potential correlation between HDAC8 gene expression level and Treg invasion level in all types of cancer in the TCGA. (b) Representative combined staining of HDAC8 (green), Foxp3 (red), and 4',6-diamidino-2-phenylindole (DAPI) (blue) in tumor tissues and para-carcinoma tissues of patients with HCC. Statistical analysis involved comparisons between two groups using a two-tailed Student's t-test for normally distributed data.

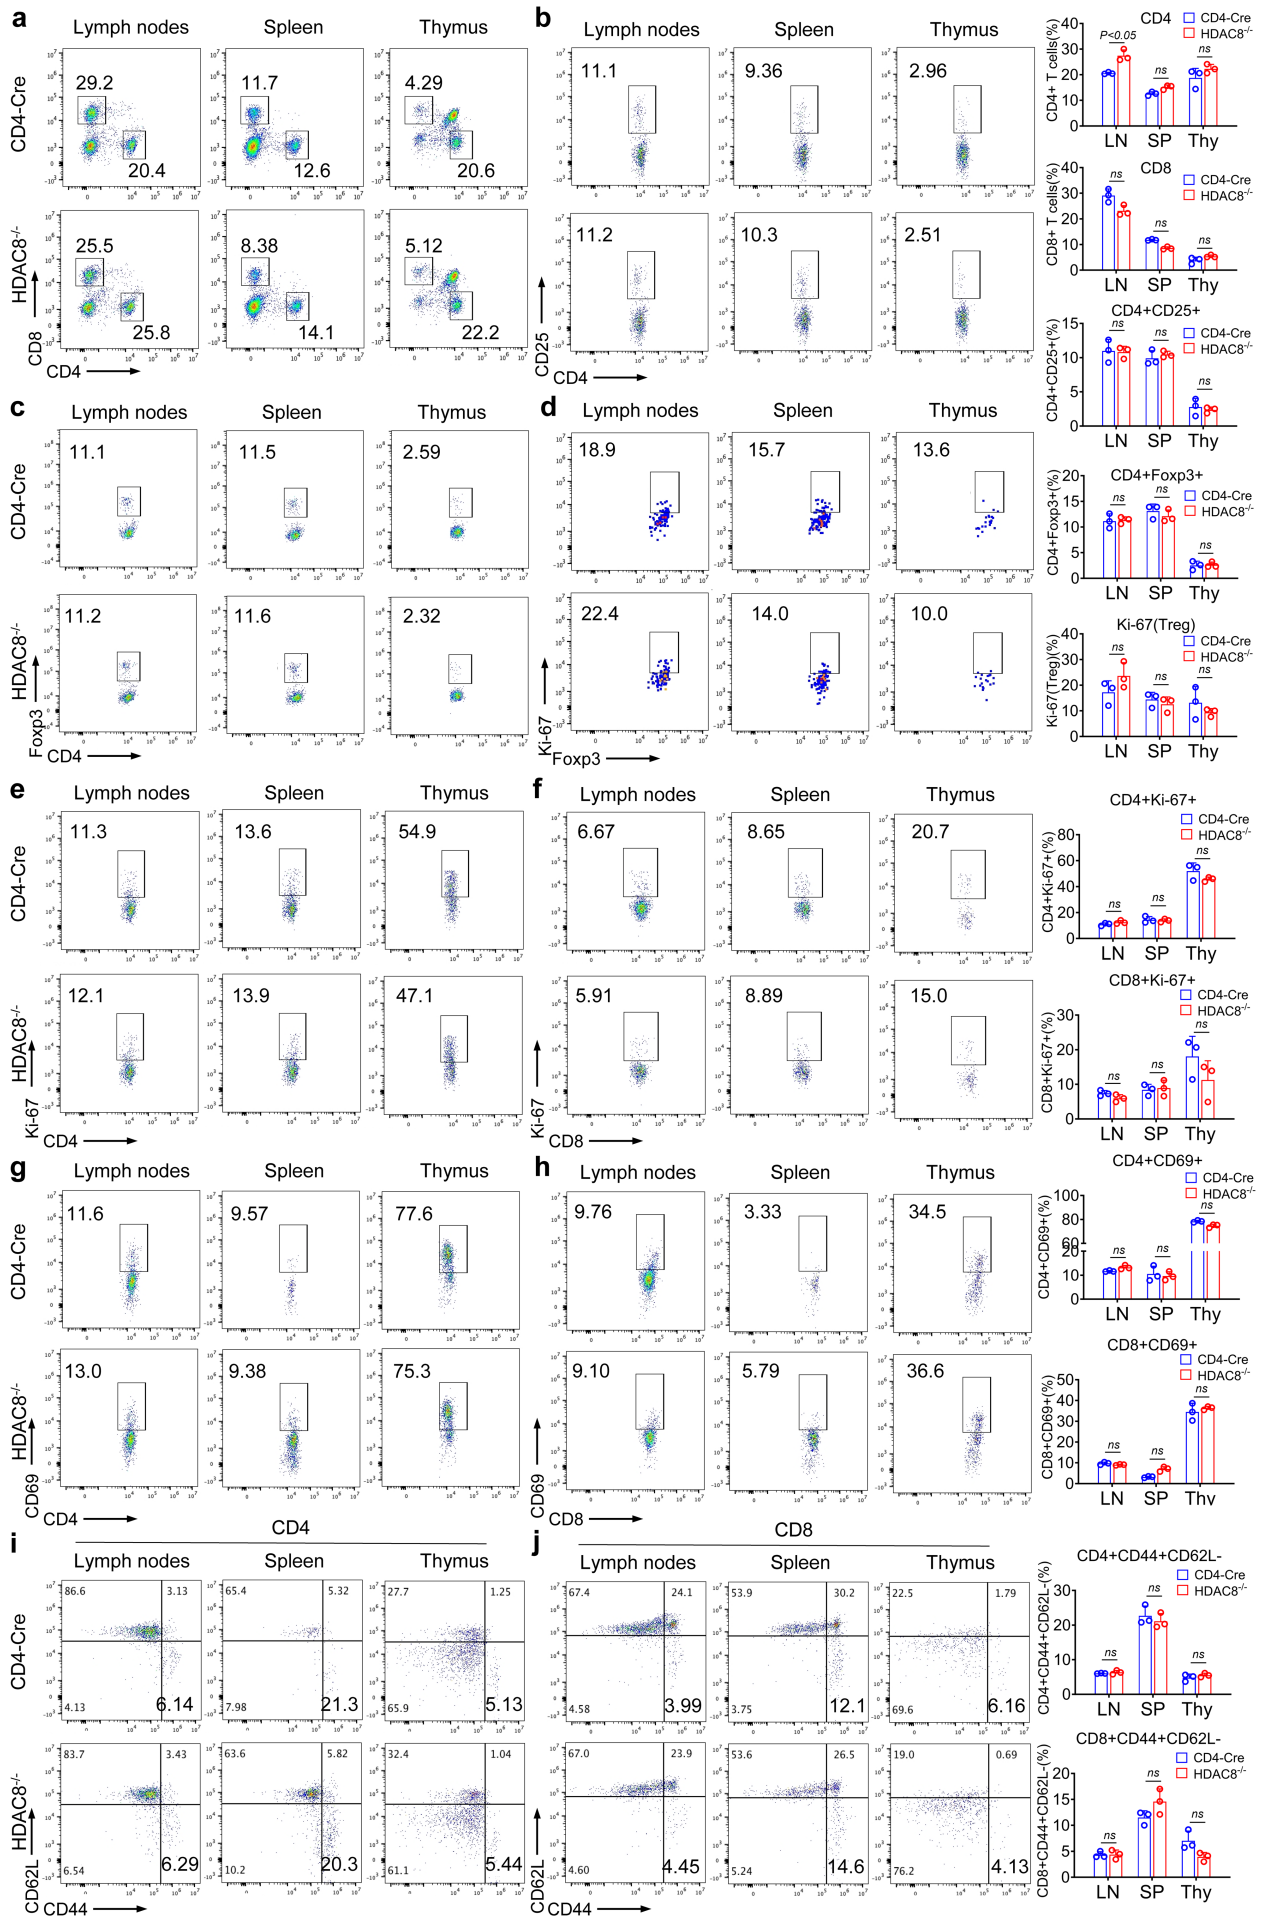

**Fig. S3:** Conditional knockout of HDAC8 has negligible effects on T cell development. (a) Flow cytometry was used to analysis the expression levels of CD4<sup>+</sup>/CD8<sup>+</sup> T cells in lymph nodes, spleen and thymus of CD4-Cre and HDAC8<sup>-/-</sup> mice. (b-c) Flow cytometry was used to analysis the expression levels of Tregs in lymph nodes, spleen and thymus of CD4-Cre and HDAC8<sup>-/-</sup> mice. (d-f) Flow cytometry was used to analysis the expression levels of Ki-67 in lymph nodes, spleen and thymus of CD4-Cre and HDAC8<sup>-/-</sup> mice. (g-h) Flow cytometry was used to analysis the expression levels of CD4<sup>+</sup>CD69<sup>+</sup> and CD8<sup>+</sup>CD69<sup>+</sup> in lymph nodes, spleen and thymus of CD4-Cre and HDAC8<sup>-/-</sup> mice. (i-j) Flow cytometry was used to analysis the expression levels of CD44<sup>+</sup>CD62l<sup>-</sup> in lymph nodes, spleen and thymus of CD4-Cre and HDAC8<sup>-/-</sup> mice. Statistical analysis involved comparisons between two groups using a two-tailed Student's t-test for normally distributed data.

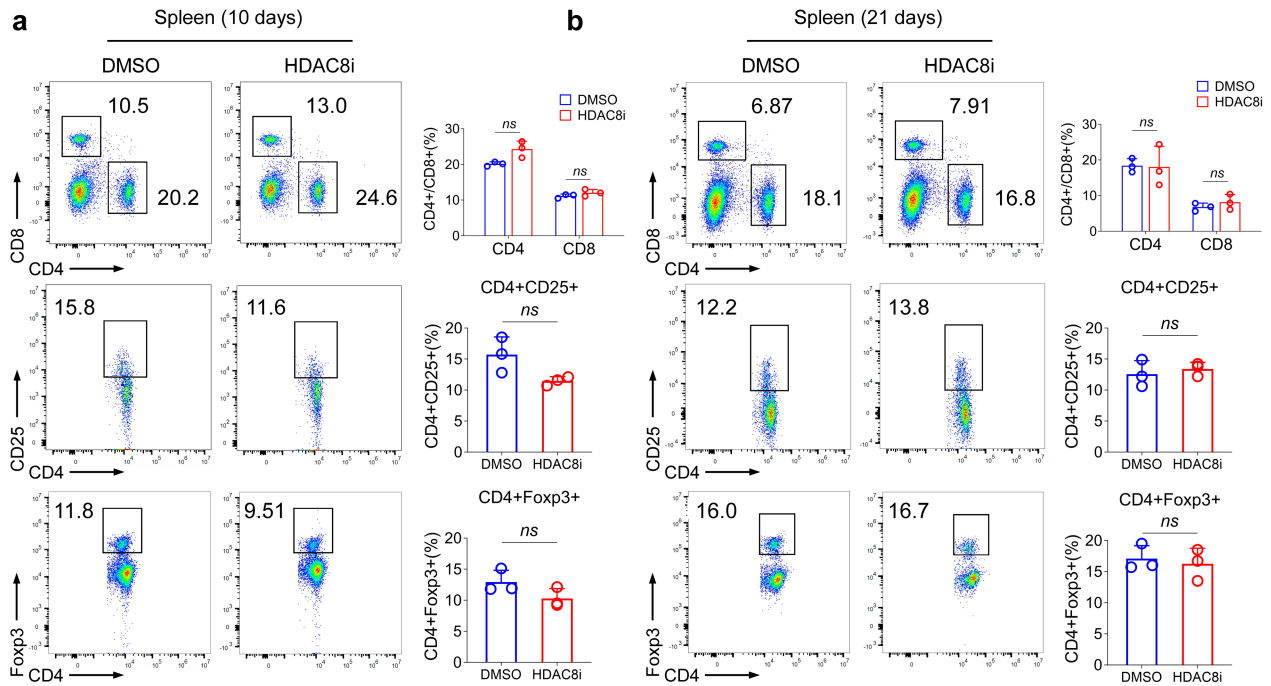

**Fig. S4:** (a) Flow cytometry was used to analyze the expression of CD4<sup>+</sup> T cells (Gate: CD4<sup>+</sup>), CD8<sup>+</sup> T cells (Gate: CD8<sup>+</sup>) and Treg cells (Gate: CD4<sup>+</sup>Foxp3<sup>+</sup>, CD4<sup>+</sup>CD25<sup>+</sup>) in spleen at 10 days after implantation of H22 cells(n=3/group). (b) Flow cytometry was used to analyze the expression of CD4<sup>+</sup> T cells (Gate: CD4<sup>+</sup>), CD8<sup>+</sup> T cells (Gate: CD8<sup>+</sup>) and Treg cells (Gate: CD4<sup>+</sup>Foxp3<sup>+</sup>, CD4<sup>+</sup>CD25<sup>+</sup>) in spleen at 21 days after implantation of H22 cells(n=3/group). Assays were run in triplicate and repeated at least 3 times. The results of a representative experiment are shown. Data were expressed as the mean  $\pm$  SD of three independent experiments (ns=not significant). Statistical analysis: Comparisons between two groups utilized a two-tailed Student's t-test for normally distributed data.

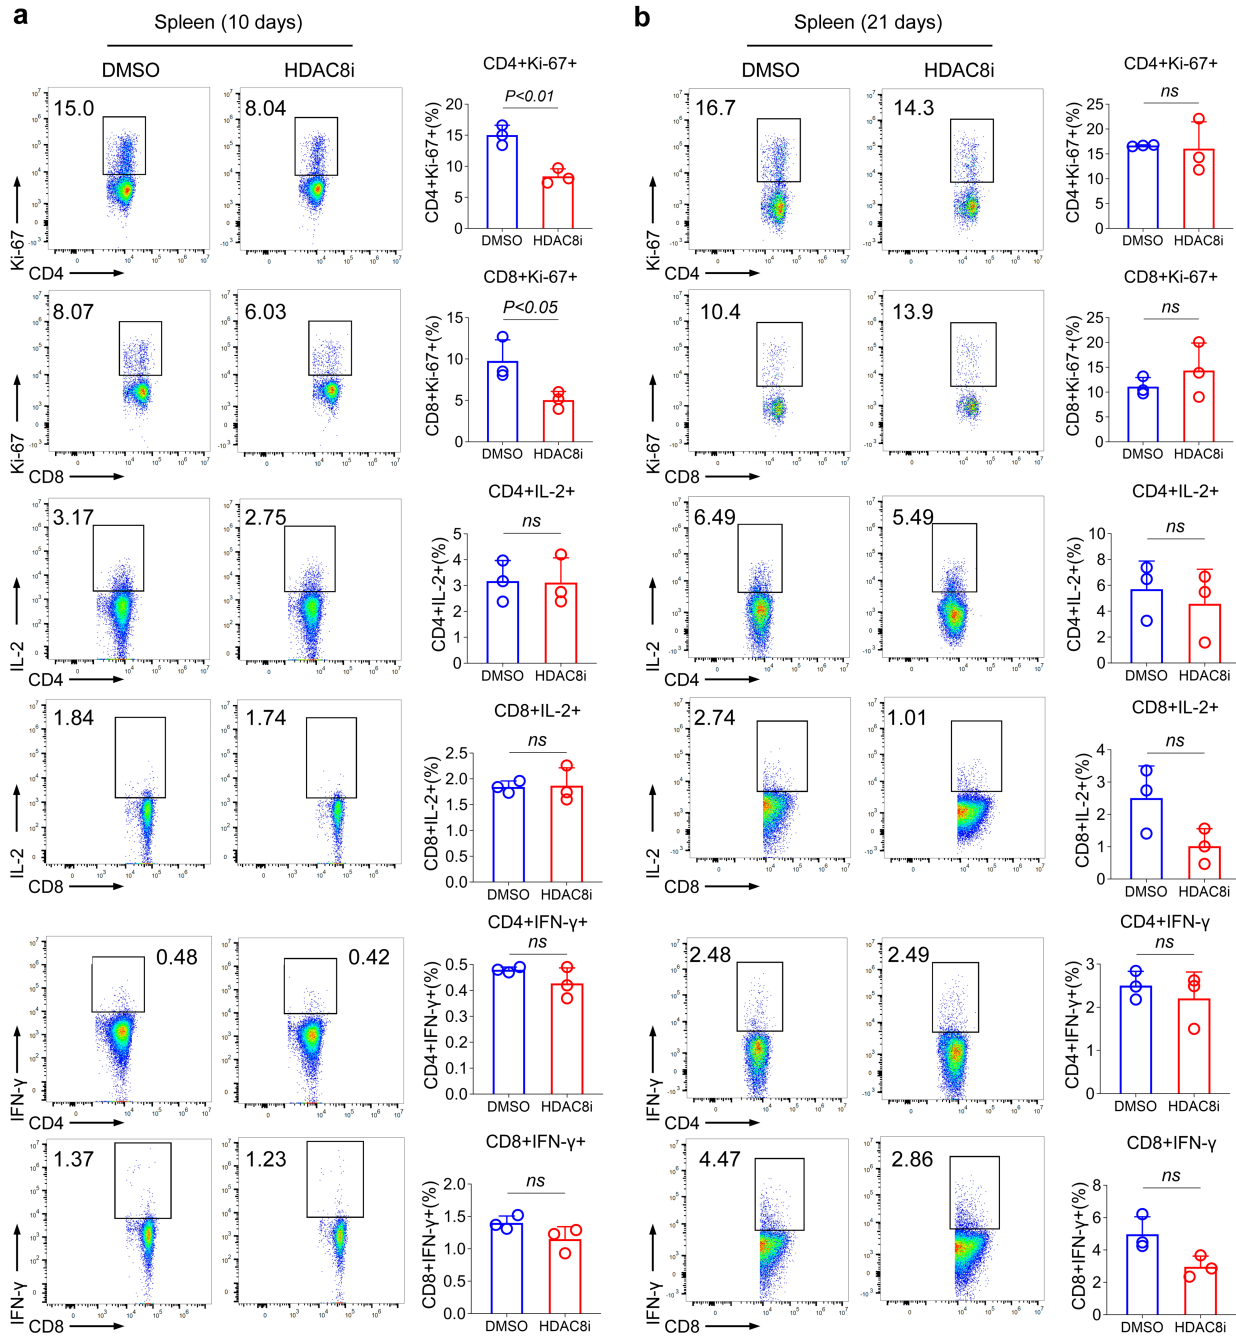

**Fig. S5:** (a) Flow cytometry was used to analyze the expression of Ki-67, IL-2 and IFN- $\gamma$  in spleen at 10 days after implantation of H22 cells(n=3/group). (b) Flow cytometry was used to analyze the expression of Ki-67, IL-2 and IFN- $\gamma$  in spleen at 21 days after implantation of H22 cells(n=3/group). Assays were run in triplicate and repeated at least 3 times. The results of a representative experiment are shown. Data were expressed as the mean  $\pm$  SD of three independent experiments (ns=not significant). Statistical analysis involved comparisons between two groups using a two-tailed Student's t-test for normally distributed data.

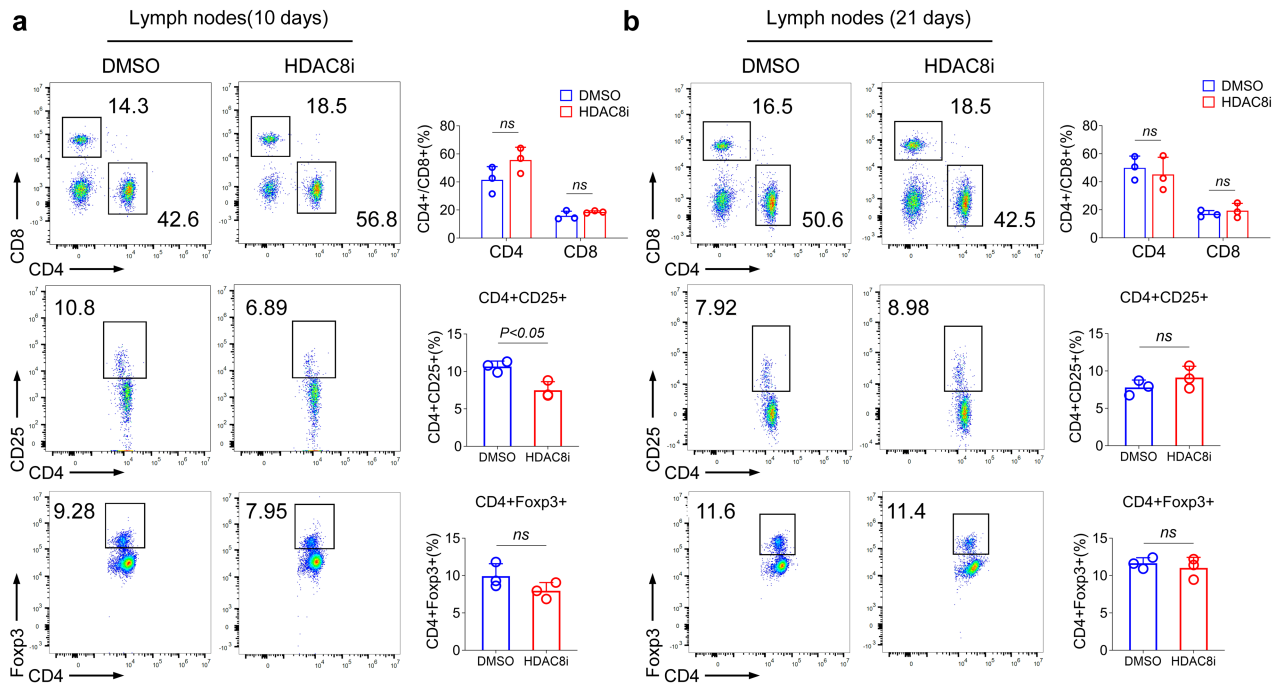

**Fig. S6:** (a) Flow cytometry was used to analyze the expression of CD4+ T cells (Gate: CD4+), CD8+ T cells (Gate: CD8+) and Treg cells (Gate: CD4+Foxp3+, CD4+CD25+) in lymph nodes at 10 days after implantation of H22 cells (n=3/group). (b) Flow cytometry was used to analyze the expression of CD4+ T cells (Gate: CD4+), CD8+ T cells (Gate: CD8+) and Treg cells (Gate: CD4+Foxp3+, CD4+CD25+) in lymph nodes at 21 days after implantation of H22 cells (n=3/group). Assays were run in triplicate and repeated at least 3 times. The results of a representative experiment are shown. Data were expressed as the mean  $\pm$  SD of three independent experiments (ns=not significant). Statistical analysis: Comparisons between two groups utilized a two-tailed Student's t-test for normally distributed data.

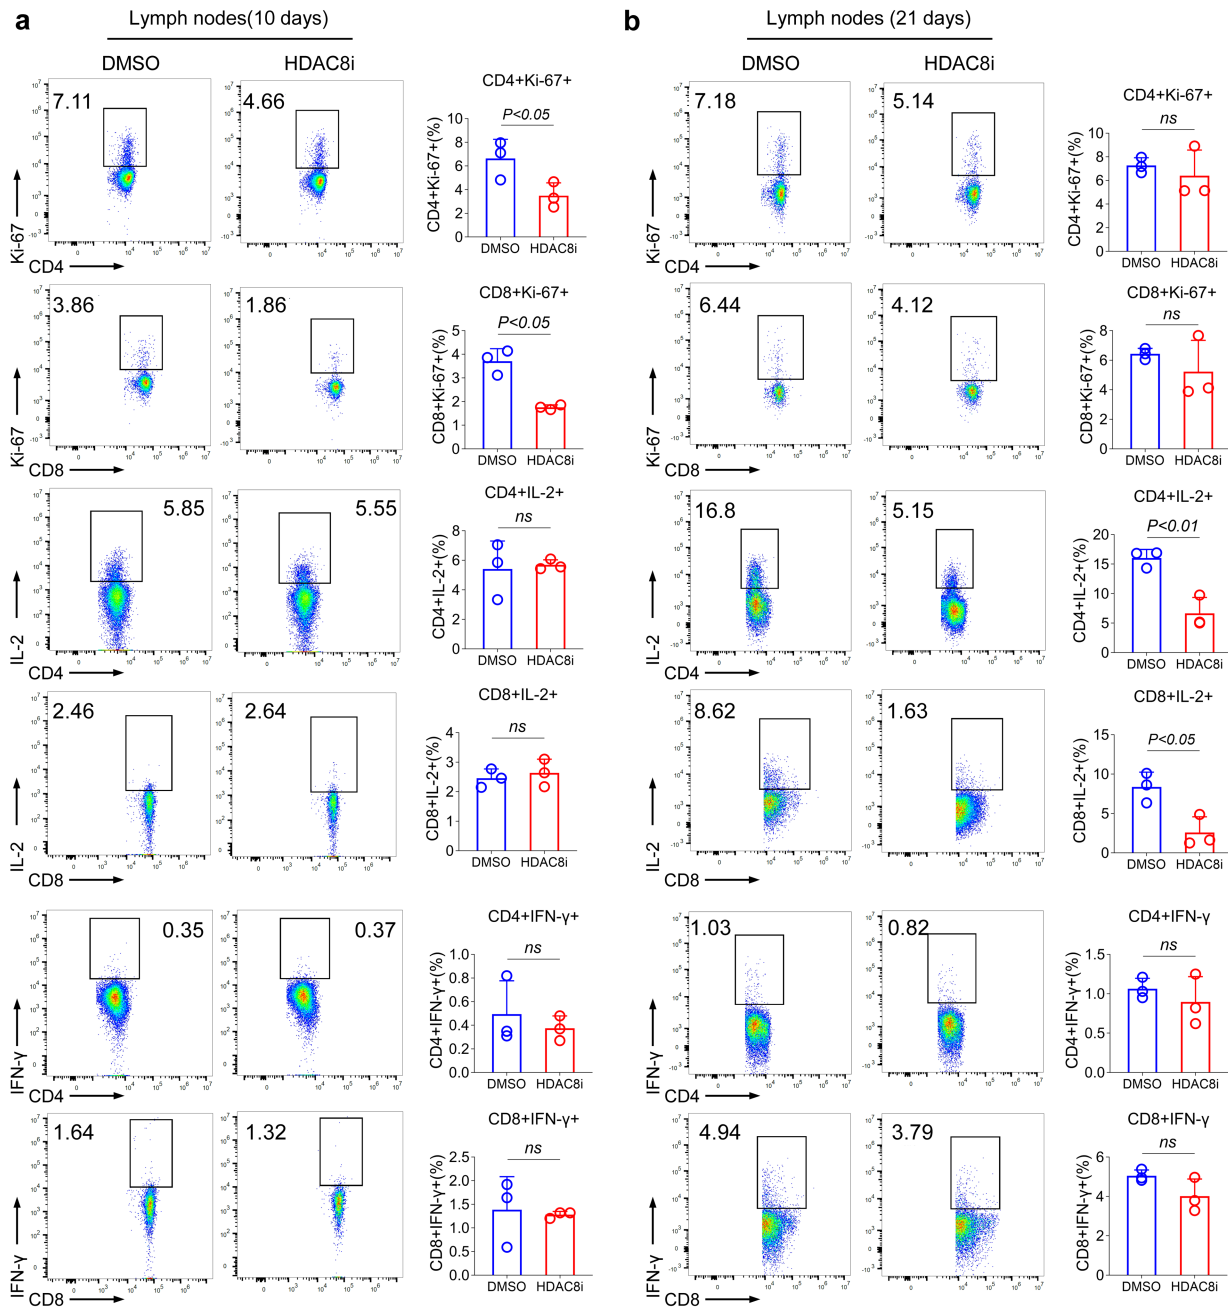

**Fig. S7:** (a) Flow cytometry was used to analyze the expression of Ki-67, IL-2 and IFN- $\gamma$  in lymph nodes at 10 days after implantation of H22 cells(n=3/group). (b) Flow cytometry was used to analyze the expression of Ki-67, IL-2 and IFN- $\gamma$  in lymph nodes at 21 days after implantation of H22 cells(n=3/group). Assays were run in triplicate and repeated at least 3 times. The results of a representative experiment are shown. Data were expressed as the mean  $\pm$  SD of three independent experiments (ns=not significant). Statistical analysis: Comparisons between two groups utilized a two-tailed Student's t-test for normally distributed data.

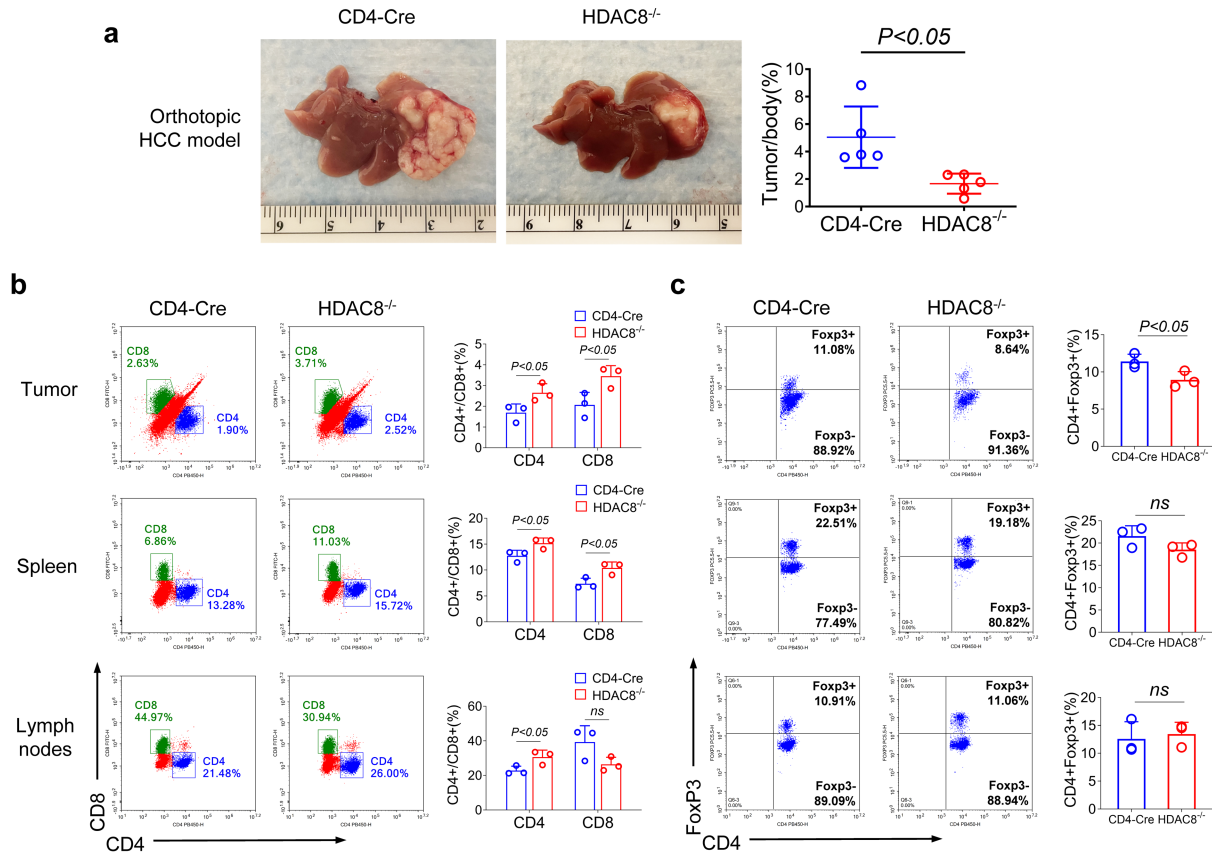

**Fig. S8:** Conditional deletion of HDAC8 promotes anti-tumor immunity in orthotopic HCC model. (a) Tumor/body weight ratios of WT and HDAC8<sup>-/-</sup> mice (n=5/group) at 21 days. (b, c) Data are expressed as changes in CD4<sup>+</sup> T cells (Gate: CD4<sup>+</sup>), CD8<sup>+</sup> T cells (Gate: CD8<sup>+</sup>), Treg (Gate: CD4<sup>+</sup>Foxp3<sup>+</sup>), and Teff cells (Gate: CD4<sup>+</sup>Foxp3<sup>-</sup>) in HCC tumors, spleen, and lymph nodes (n=3/group). Assays were run in triplicate and repeated at least 3 times. The results of a representative experiment are shown. Data were expressed as the mean  $\pm$  SD of three independent experiments (ns=not significant). Statistical analysis: Comparisons between two groups utilized a two-tailed Student's t-test for normally distributed data.

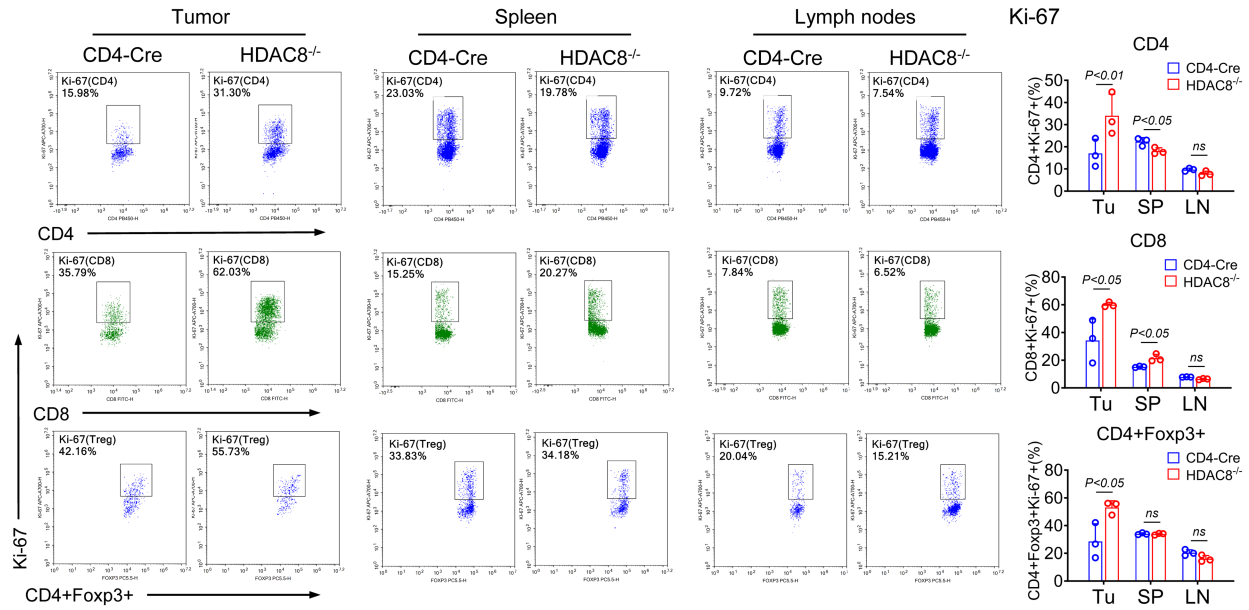

**Fig. S9:** Conditional knockout of HDAC8 promoted T cell proliferation in orthotopic HCC model. Expression of Ki-67 by tumor-infiltrating T cells, and spleen and lymph node T cells (n=3/group). Assays were run in triplicate and repeated at least 3 times. Data were expressed as the mean  $\pm$  SD of 3 independent experiments (ns=not significant). Statistical analysis: Comparisons between two groups utilized a two-tailed Student's t-test for normally distributed data.

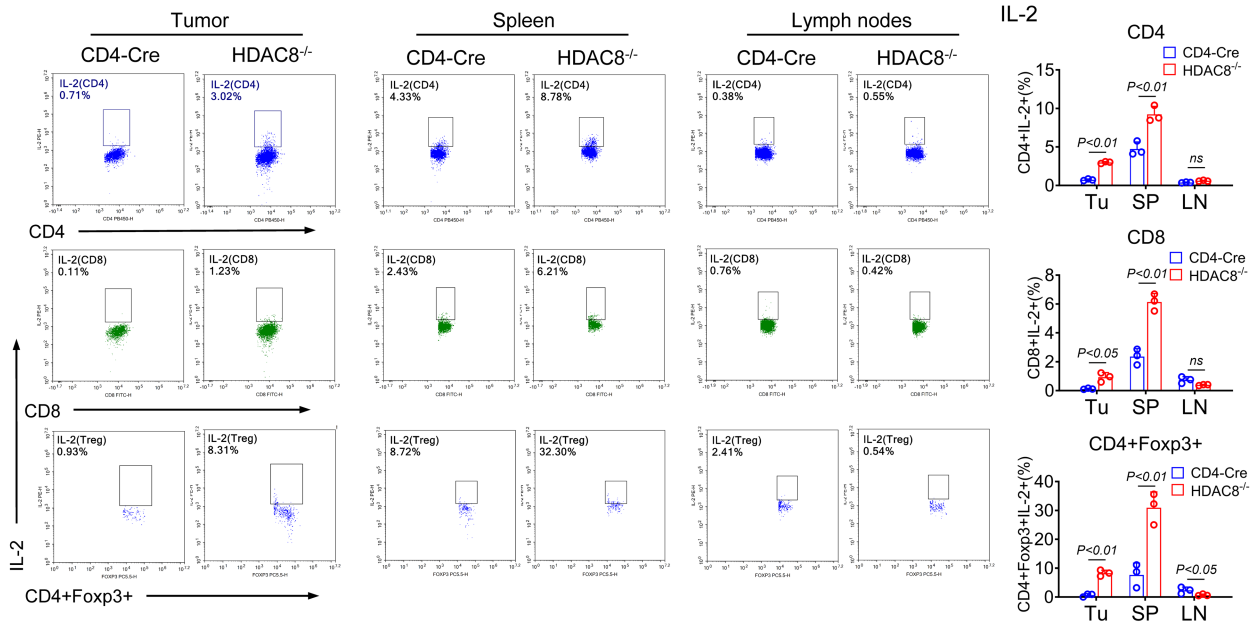

**Fig. S10:** Conditional knockout of HDAC8 promoted IL-2 production by CD4+, CD8+ T cells and Treg cells (n=3/group). Assays were run in triplicate and repeated at least 3 times. Data were expressed as the mean  $\pm$  SD of 3 independent experiments (ns=not significant). Statistical analysis: Comparisons between two groups utilized a two-tailed Student's t-test for normally distributed data.

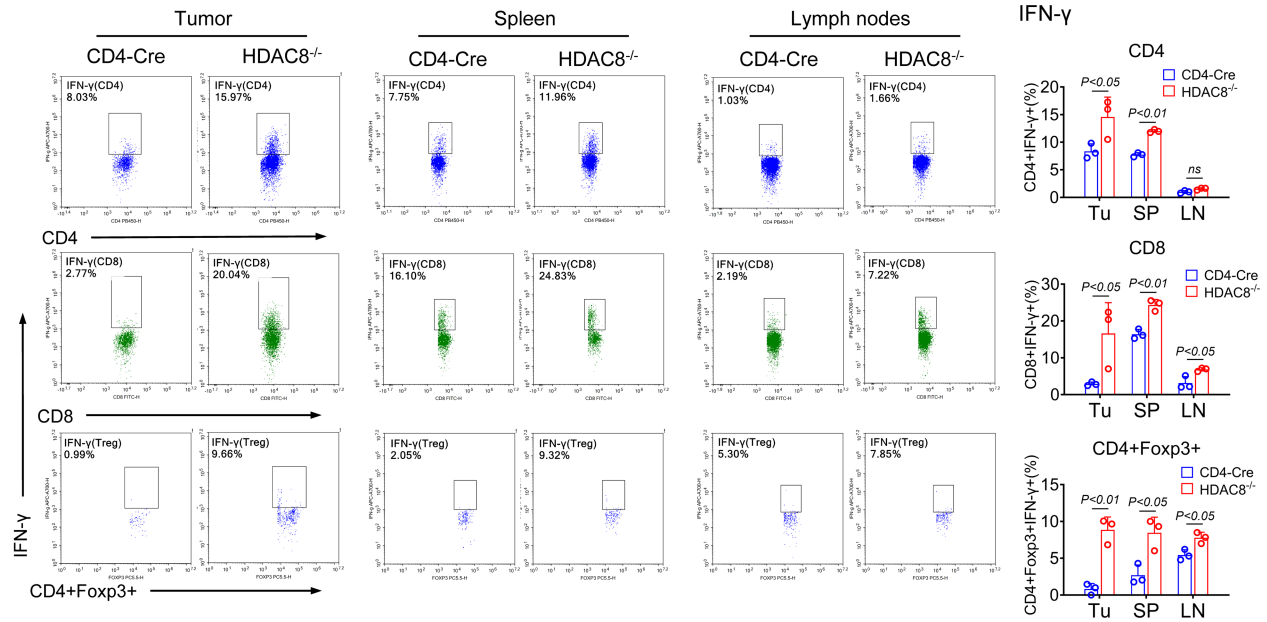

**Fig. S11:** Conditional knockout of HDAC8 promoted IFN- $\gamma$  production by CD4<sup>+</sup>, CD8<sup>+</sup> T cells and Treg cells (n=3/group). Assays were run in triplicate and repeated at least 3 times. Data were expressed as the mean  $\pm$  SD of 3 independent experiments (ns=not significant). Statistical analysis: Comparisons between two groups utilized a two-tailed Student's t-test for normally distributed data.

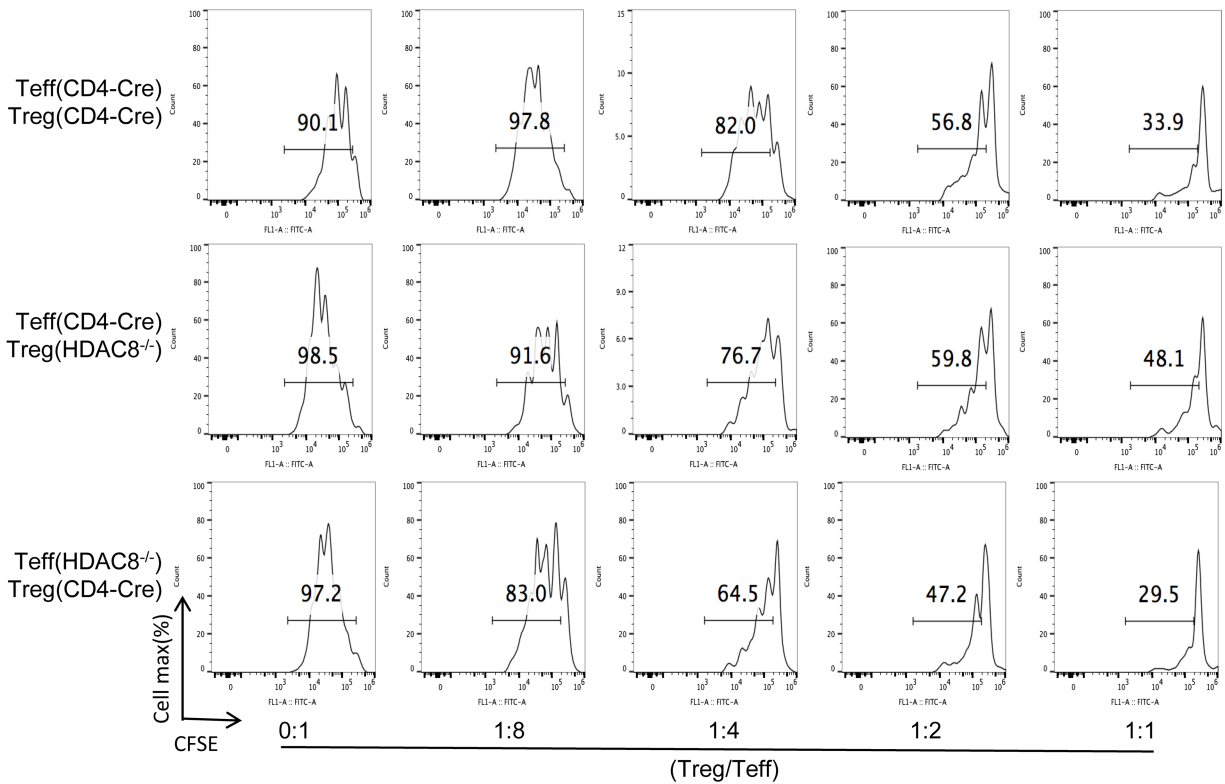

**Fig. S12:** Treg suppression assays using pooled Treg and Teff cells from lymph nodes and spleens of mice (CD4-Cre and HDAC8<sup>-/-</sup>), as indicated.



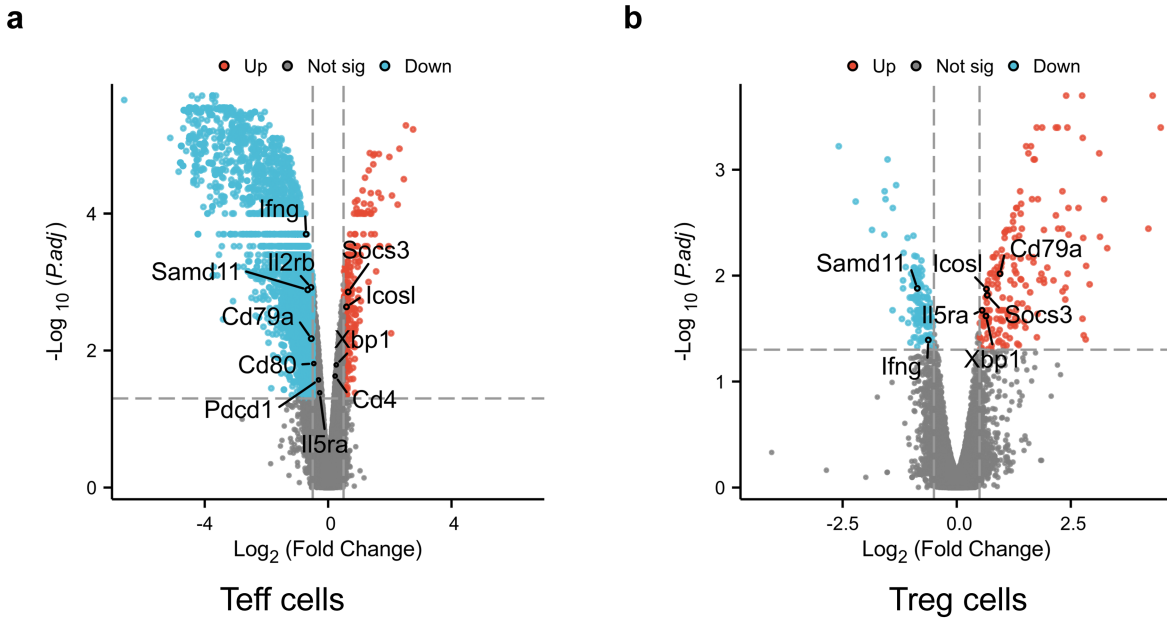

**Fig. S14:** Volcano plot showing statistical significance ( $P_{adj}$ ) vs. fold change for genes differentially expressed as a result of HDAC8 deletion in Teff cells (a) and Foxp3<sup>+</sup> Tregs (b).

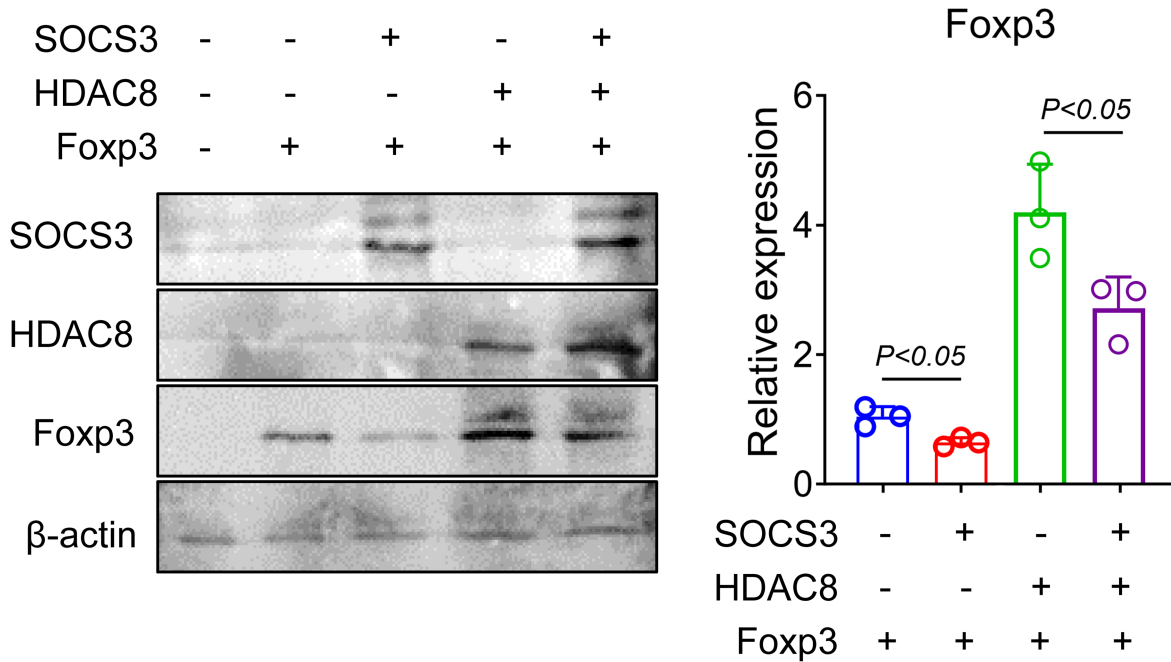

**Fig. S15:** Co-transfection analysis of HDAC8, Socs3 and Foxp3 in 293T cells ( $n=3/\text{group}$ ). Assays were run in triplicate and repeated at least 3 times. Data were expressed as the mean  $\pm$  SD of 3 independent experiments. Statistical analysis: Comparisons between two groups utilized a two-tailed Student's t-test for normally distributed data.

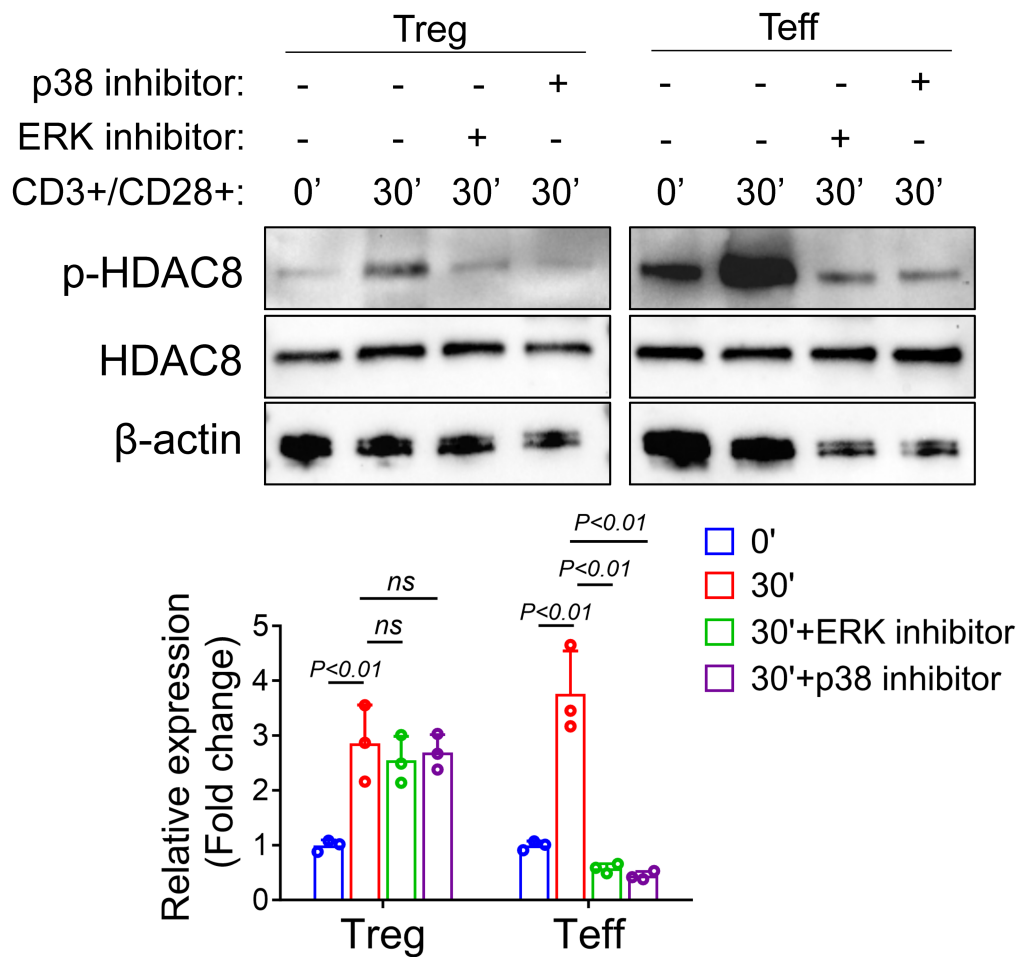

**Fig. S16:** Western blot was used to analysis the expression of p-HDAC8 in Teff and Treg cells stimulated with CD3/CD28 mAbs. Data were expressed as the mean  $\pm$  SD of 3 independent experiments (ns=not significant). Statistical analysis: Comparisons between two groups utilized a two-tailed Student's t-test for normally distributed data. For multiple comparisons, we used the two-way ANOVA method for statistical analysis.

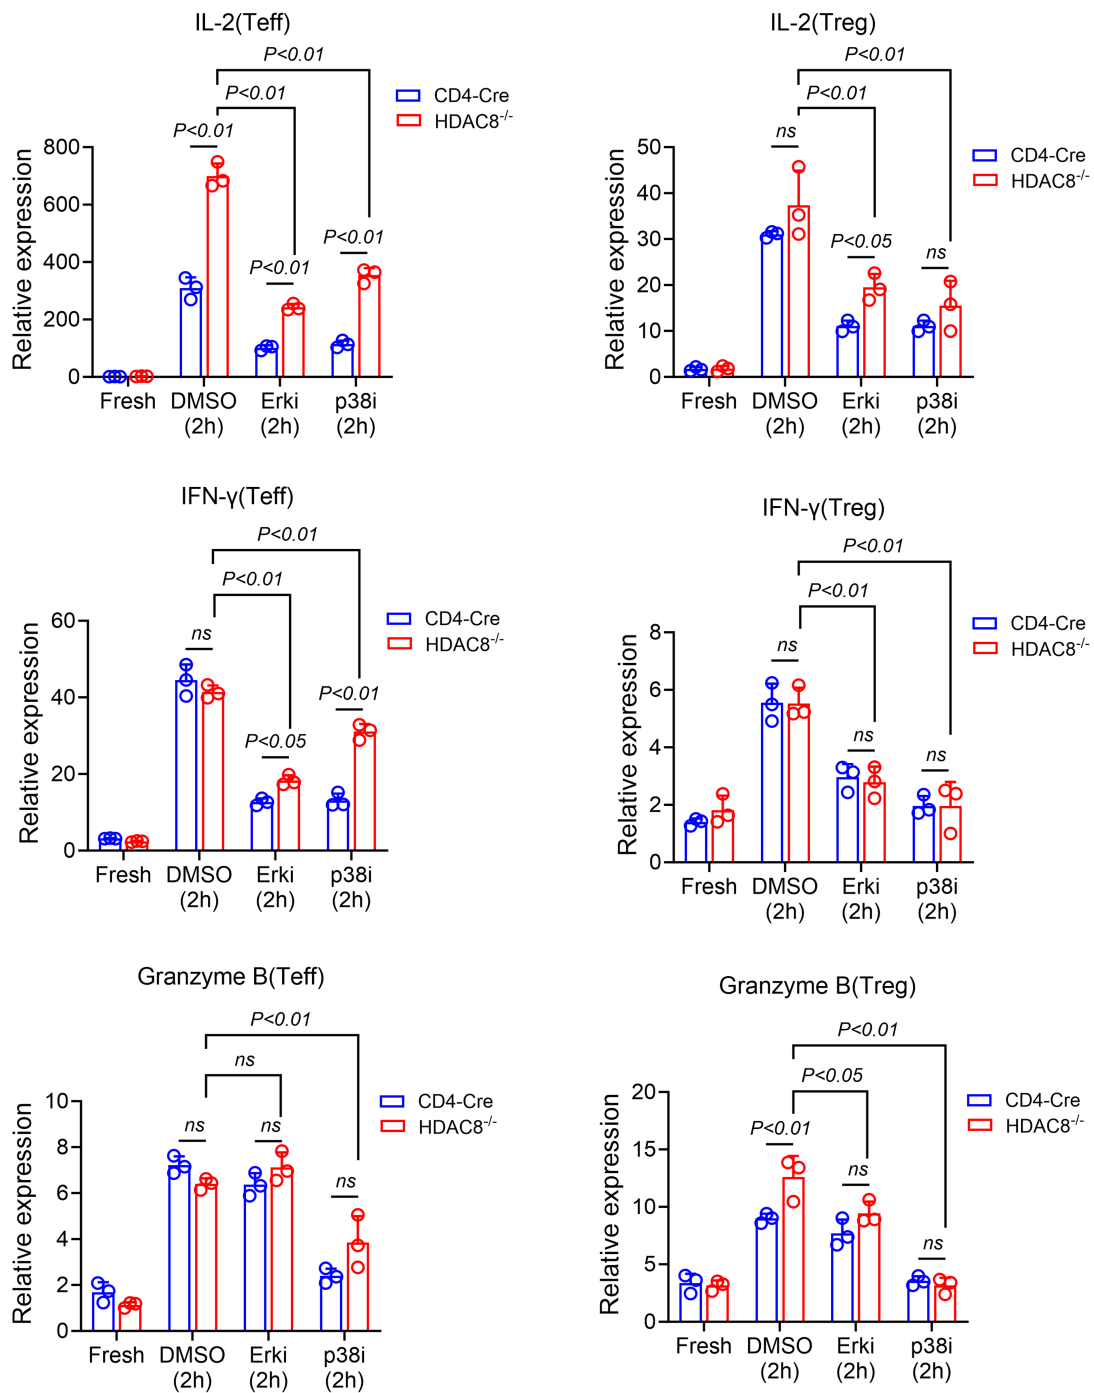

**Fig. S17:** The expression of IL-2, IFN- $\gamma$  and Granzyme B in Teff/Treg cells stimulated with CD3/CD28 mAbs and treated with ERK/p38 inhibitor was detected by PCR. Data were expressed as the mean  $\pm$  SD of 3 independent experiments (ns=not significant). Statistical analysis: Comparisons between two groups utilized a two-tailed Student's t-test for normally distributed data. For multiple comparisons, we used the two-way ANOVA method for statistical analysis.

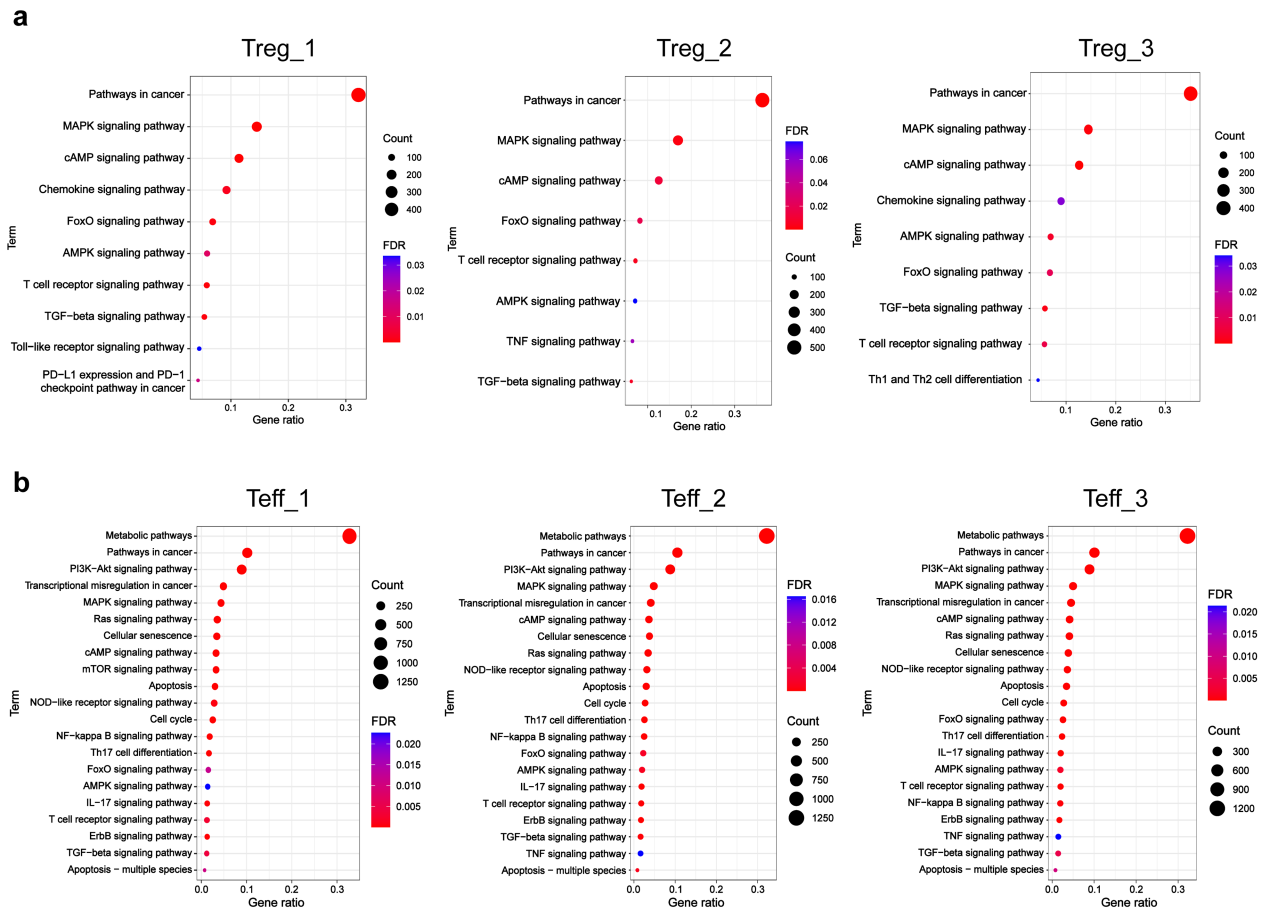

**Fig. S18:** HDAC8 ChIP-seq analysis in Treg (a) and Teff (b) cells (KEGG enrichment analysis).

a

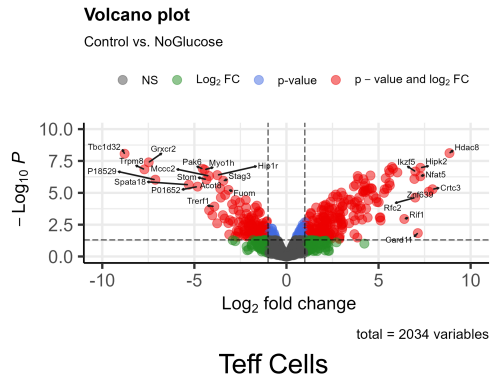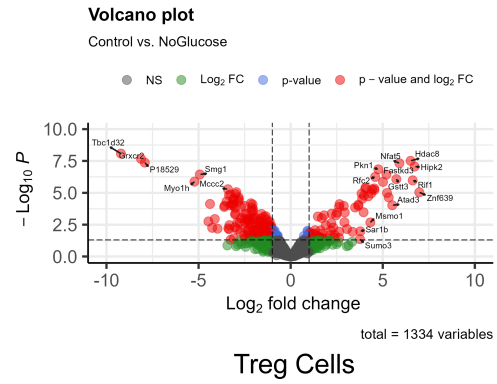

b

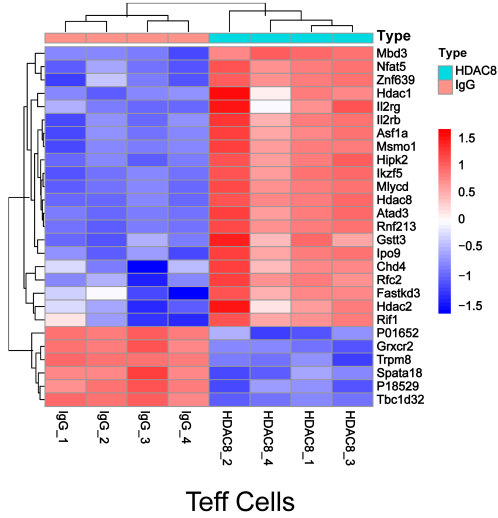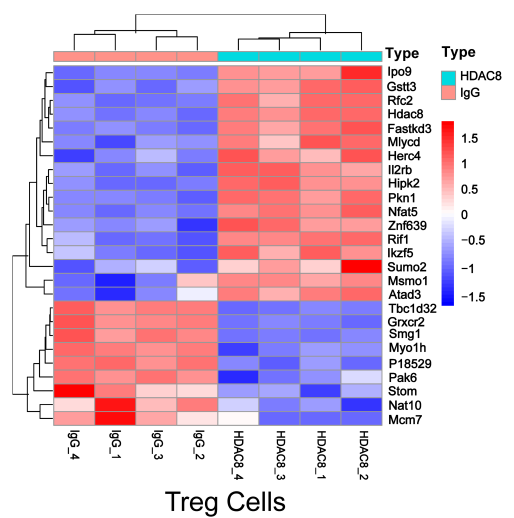

**Fig. S19:** HDAC8 mass spectrometry analysis in Treg and Teff cells. (a) Volcanic dot plot of HDAC8 mass spectrometry analysis in Treg and Teff cells. (b) Heat map of HDAC8 mass spectrometry analysis in Treg and Teff cells.

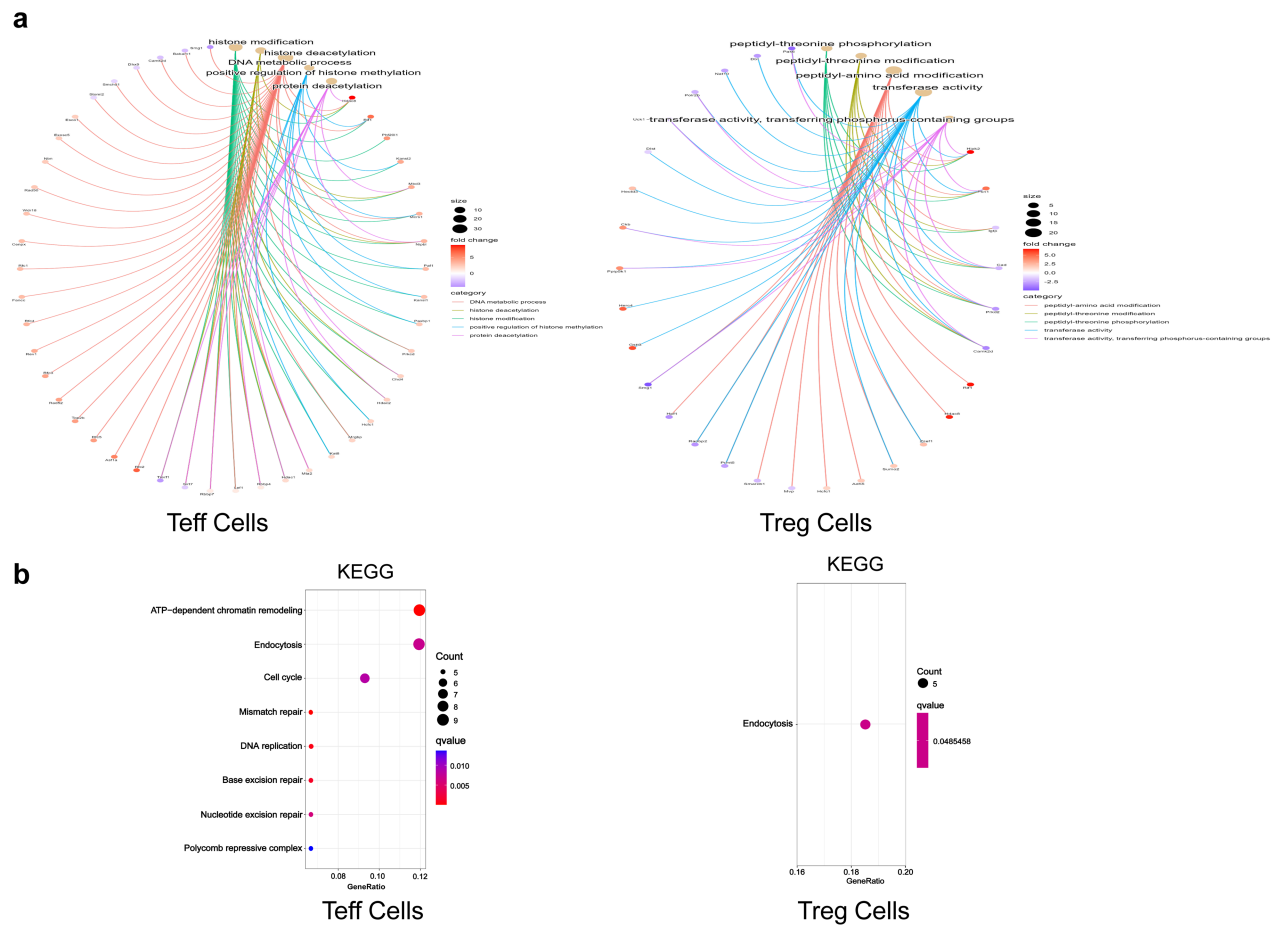

**a**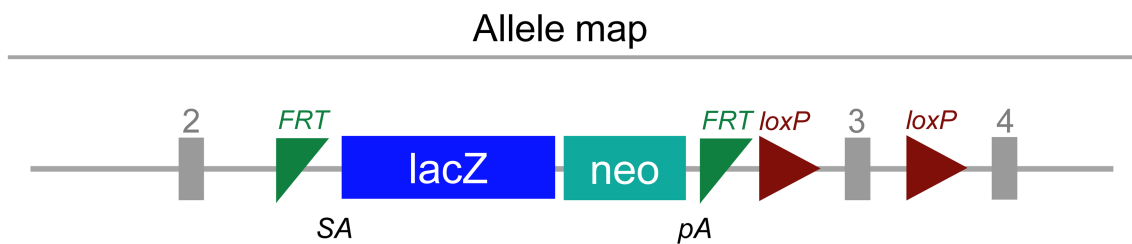**b**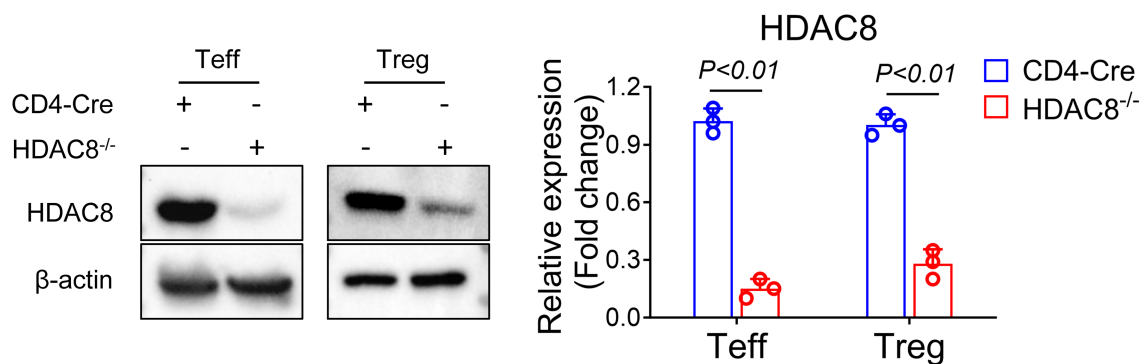

**Fig. S21:** (a) Allele map of HDAC8<sup>fl/fl</sup> mice. (b) Western blot analysis was used to detect the expression of HDAC8 in Teff and Treg cells. Assays were run in triplicate and repeated at least 3 times. The results of a representative experiment are shown. Data were expressed as the mean  $\pm$ SD of three independent experiments. Statistical analysis: Comparisons between two groups utilized a two-tailed Student's t-test for normally distributed data.

## List of Supplementary Tables

- Table S1:** Methylation site and relative position of Foxp3 in Foxp3+ Treg and effector T Cells.
- Table S2:** Differentially expressed genes in Foxp3+ Treg cells after deletion of HDAC8.
- Table S3:** Differentially expressed genes in effector T Cells after deletion of HDAC8.
- Table S4:** Narrow peaks ChIPseeker annotation of HDAC8 in Teff cells (1).
- Table S5:** Narrow peaks ChIPseeker annotation of HDAC8 in Teff cells (2).
- Table S6:** Narrow peaks ChIPseeker annotation of HDAC8 in Teff cells (3).
- Table S7:** Narrow peaks ChIPseeker annotation of HDAC8 in Treg cells (1).
- Table S8:** Narrow peaks ChIPseeker annotation of HDAC8 in Treg cells (2).
- Table S9:** Narrow peaks ChIPseeker annotation of HDAC8 in Treg cells (3).
- Table S10:** Mass spectrometry analysis of HDAC8 in effector T cells.
- Table S11:** Mass spectrometry analysis of HDAC8 in Foxp3+ Treg cells.
- Table S12:** Antibodies used in this study.
- Table S13:** Number of cells for each cell subset per flow cytometry.
- Table S14:** Primers sequences used for real-time PCR and ChIP-PCR.

Table S1: Methylation site and relative position of Foxp3 in Foxp3+ Treg and Effector T Cells

| <b>Methylation site</b>    | <b>CPG Position</b> | <b>Location</b> | <b>CD4-Cre<br/>(Teff)</b> | <b>DHAC8-/-<br/>(Teff)</b> | <b>CD4-Cre<br/>(Treg)</b> | <b>DHAC8-/-<br/>(Treg)</b> |
|----------------------------|---------------------|-----------------|---------------------------|----------------------------|---------------------------|----------------------------|
| 24WXX2021-FoxP3-18_CpG_1   | 79                  | H_mass          | NA                        | NA                         | NA                        | NA                         |
| 24WXX2021-FoxP3-18_CpG_2   | 149                 | SN1             | 0.93                      | 1                          | 0.22                      | 0.19                       |
| 24WXX2021-FoxP3-18_CpG_3   | 211                 | SN3             | 1                         | 0.71                       | 0                         | 0.13                       |
| 24WXX2021-FoxP3-18_CpG_4.5 | 219:223             | NA              | 0.96                      | 0.98                       | 0.22                      | 0.25                       |
| 24WXX2021-FoxP3-18_CpG_6   | 242                 | SN3             | 1                         | 1                          | 0.57                      | 0.57                       |
| 24WXX2021-FoxP3-18_CpG_7.8 | 291:296             | NA              | 0.92                      | 0.96                       | 0.23                      | 0.23                       |
| 24WXX2021-FoxP3-18_CpG_9   | 323                 | SN1             | 1                         | 1                          | 0.06                      | 0                          |
| 24WXX2021-FoxP3-18_CpG_10  | 357                 | SN1             | 1                         | 1                          | NA                        | NA                         |
| 24WXX2021-FoxP3-18_CpG_11  | 373                 | SN1             | 0.86                      | 0.9                        | 0.5                       | 0.64                       |
| 24WXX2021-FoxP3-18_CpG_12  | 409                 | L_mass SN4      | NA                        | NA                         | NA                        | NA                         |

Table S2: The differentially expressed genes in Foxp3+ Treg cells after deletion of HDAC8

| ID                  | HDAC8-KO Avg (log2) | CD4-Cre Avg (log2) | Fold Change (HDAC8-KO vs CD4-Cre) Tregs | P-val    | FDR P-val | Gene Symbol      |
|---------------------|---------------------|--------------------|-----------------------------------------|----------|-----------|------------------|
| TC0900001592.mm.1   | 11.22               | 11.9               | -1.6                                    | 0.0001   | 0.0293    | Ccr8             |
| TC0700002007.mm.1   | 8.12                | 6.21               | 3.76                                    | 2.59E-06 | 0.0037    | Cd16311          |
| TC1600000662.mm.1   | 9.29                | 9.98               | -1.61                                   | 6.05E-05 | 0.0212    | Cd200r1          |
| TC0300000693.mm.1   | 5.64                | 6.57               | -1.9                                    | 6.18E-06 | 0.0065    | Cd51             |
| TC0700000402.mm.1   | 10.24               | 9.29               | 1.93                                    | 1.46E-05 | 0.0096    | Cd79a            |
| TC1600001744.mm.1   | 10.34               | 9.89               | 1.37                                    | 0.0002   | 0.0431    | Cep97            |
| TC0X00001934.mm.1   | 7.76                | 8.33               | -1.49                                   | 4.59E-05 | 0.0181    | Cfp              |
| TC0300001704.mm.1   | 9.3                 | 8.85               | 1.37                                    | 0.0002   | 0.0384    | Cpa3             |
| TC0100003856.mm.1   | 5.98                | 6.49               | -1.42                                   | 0.0003   | 0.0489    | Cr2              |
| TC1800000625.mm.1   | 6.11                | 7.19               | -2.11                                   | 3.73E-06 | 0.0044    | Csflr            |
| TC0500000850.mm.1   | 6.14                | 6.75               | -1.53                                   | 0.0001   | 0.0255    | Cxcl2            |
| TC09000002171.mm.1  | 11.12               | 10.24              | 1.85                                    | 1.41E-05 | 0.0096    | Cxcr5            |
| TC0500001894.mm.1   | 8.87                | 9.41               | -1.45                                   | 0.0002   | 0.0441    | Cyp51            |
| TC0X00002834.mm.1   | 7.27                | 6.55               | 1.65                                    | 7.14E-05 | 0.0212    | Cysltrl          |
| TC1400000975.mm.1   | 10.04               | 9.04               | 1.99                                    | 6.72E-06 | 0.0067    | Entpd4           |
| TC1900001095.mm.1   | 7.28                | 6.62               | 1.58                                    | 6.93E-05 | 0.0212    | Fads2            |
| TC0X00001789.mm.1   | 8.6                 | 8.11               | 1.4                                     | 0.0002   | 0.035     | Gata1            |
| TC0300001447.mm.1   | 13.12               | 12.5               | 1.53                                    | 8.51E-05 | 0.0239    | Gbp2             |
| TC1400001012.mm.1   | 5.51                | 6.41               | -1.86                                   | 1.41E-05 | 0.0096    | Gfra2            |
| TC1700000625.mm.1   | 9.34                | 9.95               | -1.53                                   | 2.98E-05 | 0.0141    | H2-Ob            |
| TC1300000262.mm.1   | 8.05                | 6.96               | 2.13                                    | 0.0003   | 0.0457    | Hist1hla         |
| TC0800000845.mm.1   | 6.9                 | 8.08               | -2.26                                   | 2.67E-05 | 0.0132    | Hmox1            |
| TC1000000778.mm.1   | 10.79               | 10.14              | 1.57                                    | 2.77E-05 | 0.0134    | Icos1            |
| TC1000001452.mm.1   | 9.55                | 10.17              | -1.54                                   | 0.0002   | 0.0405    | Ifng             |
| TC1200002538.mm.1   | 8.17                | 5.86               | 4.97                                    | 2.24E-06 | 0.0036    | Ighe             |
| TC0100000300.mm.1   | 9.16                | 9.92               | -1.69                                   | 0.0002   | 0.0391    | Il18rap          |
| TC0200004602.mm.1   | 5.59                | 6.4                | -1.75                                   | 3.22E-05 | 0.015     | Il1b             |
| TC0100000295.mm.1   | 7.82                | 6.81               | 2.02                                    | 0.0001   | 0.0268    | Il1r1            |
| TC0600002425.mm.1   | 9.31                | 8.43               | 1.84                                    | 1.66E-05 | 0.0105    | Il23r            |
| TC0600002877.mm.1   | 6.76                | 6.2                | 1.47                                    | 7.21E-05 | 0.0212    | Il5ra            |
| TC0800001599.mm.1   | 13.14               | 13.78              | -1.56                                   | 3.79E-05 | 0.0161    | Itgbl            |
| TC05000002712.mm.1  | 15.9                | 14.92              | 1.96                                    | 0.0001   | 0.0266    | Jchain           |
| TC0600003062.mm.1   | 10.55               | 11.47              | -1.9                                    | 1.04E-05 | 0.0084    | Klrg1            |
| TC0600003246.mm.1   | 8.28                | 9.09               | -1.75                                   | 0.0001   | 0.0255    | Klri1            |
| TC0600003247.mm.1   | 7.85                | 8.5                | -1.58                                   | 0.0001   | 0.0255    | Klri2            |
| TC0400001697.mm.1   | 4.92                | 5.87               | -1.92                                   | 2.32E-05 | 0.0121    | LOC100862132     |
| TC1000002929.mm.1   | 6.78                | 7.98               | -2.3                                    | 0.0001   | 0.0256    | Lyz2             |
| TC0200001935.mm.1   | 5.91                | 6.61               | -1.63                                   | 7.87E-05 | 0.0226    | Mertk            |
| TC0800000952.mm.1   | 8.78                | 8.23               | 1.46                                    | 0.0003   | 0.048     | Mir27a           |
| TC0600002009.mm.1   | 9.16                | 8.49               | 1.6                                     | 0.0002   | 0.035     | Mir29a           |
| TC06000003219.mm.1  | 8.37                | 7.42               | 1.93                                    | 1.28E-05 | 0.0093    | Mir7649          |
| TC0200000245.mm.1   | 6.04                | 6.77               | -1.67                                   | 6.53E-05 | 0.0212    | Mrc1             |
| TC0800001095.mm.1   | 9.89                | 9                  | 1.86                                    | 2.18E-05 | 0.0119    | Mt1              |
| TC1800001176.mm.1   | 11.19               | 9.87               | 2.49                                    | 1.15E-06 | 0.0023    | Mzb1             |
| TC0100002743.mm.1   | 8.41                | 7.42               | 1.98                                    | 8.53E-06 | 0.0076    | Nmur1            |
| TC0400002139.mm.1   | 9.02                | 10.08              | -2.09                                   | 0.0001   | 0.0279    | Penk             |
| TC06000003329.mm.1  | 8                   | 8.68               | -1.6                                    | 0.0002   | 0.0366    | Plbd1            |
| TC1900000472.mm.1   | 9.6                 | 10.04              | -1.36                                   | 0.0003   | 0.0464    | Pten             |
| TC0100002413.mm.1   | 7.68                | 8.36               | -1.6                                    | 2.64E-05 | 0.0131    | Raph1            |
| TC0300000864.mm.1   | 8.54                | 7.57               | 1.95                                    | 7.01E-05 | 0.0212    | Rorc             |
| TC04000004175.mm.1  | 6.06                | 6.93               | -1.82                                   | 2.71E-05 | 0.0132    | Samd11           |
| TC03000002465.mm.1  | 9.86                | 9.15               | 1.64                                    | 0.0001   | 0.0255    | Scnml            |
| TC0200001959.mm.1   | 7.1                 | 7.81               | -1.65                                   | 3.53E-05 | 0.0159    | Sirpa            |
| TC1600001582.mm.1   | 9.04                | 8.35               | 1.61                                    | 1.90E-05 | 0.0111    | Slc15a2          |
| TC0100002285.mm.1   | 6.17                | 6.99               | -1.77                                   | 7.69E-05 | 0.0223    | Slc40a1          |
| TC02000005112.mm.1  | 8.05                | 7.13               | 1.89                                    | 1.18E-05 | 0.009     | Slpi; Mir7678    |
| TC1500002177.mm.1   | 9.04                | 9.63               | -1.51                                   | 0.0001   | 0.0279    | Snora34; Mir1291 |
| TC1100001783.mm.1   | 14.36               | 15.13              | -1.71                                   | 2.47E-05 | 0.0125    | Snord104         |
| TSUnmapped00000178. | 13.63               | 14.18              | -1.46                                   | 0.0002   | 0.0385    | Snord14e         |
| TC1100004150.mm.1   | 8.65                | 7.98               | 1.59                                    | 3.33E-05 | 0.0153    | Socs3            |
| TC1000002647.mm.1   | 5.88                | 7.39               | -2.86                                   | 2.01E-07 | 0.0008    | Spic             |
| TC02000005164.mm.1  | 7.74                | 8.32               | -1.5                                    | 0.0002   | 0.0391    | Sulf2            |
| TC1300000144.mm.1   | 14.81               | 13.76              | 2.07                                    | 6.90E-05 | 0.0212    | Tcrg-C3          |
| TC1300000145.mm.1   | 11.97               | 12.73              | -1.69                                   | 1.14E-05 | 0.0089    | Tcrg-C4; Trgj4   |

|                     |       |       |       |          |        |                |
|---------------------|-------|-------|-------|----------|--------|----------------|
| TC1300000138. mm. 1 | 4.69  | 5.67  | -1.98 | 3.85E-05 | 0.0161 | Tcrg-V7        |
| TC0300000889. mm. 1 | 6.13  | 7.01  | -1.84 | 6.37E-06 | 0.0066 | Tmod4          |
| TC1600000137. mm. 1 | 9.13  | 8.13  | 2.01  | 3.78E-05 | 0.0161 | Tnfrsf17       |
| TC1100003694. mm. 1 | 6.33  | 5.8   | 1.45  | 0.0002   | 0.0417 | Tns4           |
| TC0100002038. mm. 1 | 12    | 11.12 | 1.85  | 9.82E-06 | 0.0083 | Tram2          |
| TC1400000632. mm. 1 | 11.6  | 12.41 | -1.75 | 0.0001   | 0.0255 | Trav11d        |
| TC1400002800. mm. 1 | 11.43 | 11.9  | -1.38 | 0.0003   | 0.048  | Trav9d-2       |
| TC1400000644. mm. 1 | 10.5  | 10.98 | -1.4  | 0.0002   | 0.0359 | Trav9d-3       |
| TC1400000715. mm. 1 | 8.7   | 7.41  | 2.46  | 7.19E-05 | 0.0212 | Trdv4          |
| TC1300002762. mm. 1 | 14.57 | 13.27 | 2.47  | 1.10E-06 | 0.0023 | Trgj1; Tcrg-C1 |
| TC1300001835. mm. 1 | 13.09 | 12.22 | 1.83  | 5.73E-06 | 0.0062 | Txndc5         |
| TC0300002802. mm. 1 | 7.33  | 8.27  | -1.92 | 1.05E-05 | 0.0084 | Vcam1          |
| TC1100000072. mm. 1 | 13.36 | 12.72 | 1.56  | 8.60E-05 | 0.024  | Xbp1           |
| TC0X00000676. mm. 1 | 6.77  | 7.62  | -1.8  | 1.16E-05 | 0.0089 | Xlr3b          |
| TC0X00000723. mm. 1 | 6.35  | 7     | -1.57 | 0.0001   | 0.0304 | Xlr3d-ps       |
| TC1600001838. mm. 1 | 10.59 | 11.21 | -1.53 | 0.0001   | 0.0304 | Zfp654         |

Table S3: The differentially expressed genes in effector T Cells after deletion of HDAC8

| ID                  | HDAC8-KO Avg (log2) | CD4-Cre Avg (log2) | Fold Change (HDAC8-KO vs CD4-Cre) Teff | P-val    | FDR P-val | Gene Symbol    |
|---------------------|---------------------|--------------------|----------------------------------------|----------|-----------|----------------|
| TC1100000251. mm. 1 | 6.66                | 7.06               | -1.32                                  | 0.0001   | 0.0032    | Bcl11a         |
| TC0100002894. mm. 1 | 12.41               | 12.65              | -1.19                                  | 0.0023   | 0.029     | Bcl2           |
| TC0200001927. mm. 1 | 10.87               | 11.16              | -1.22                                  | 0.0026   | 0.0314    | Bcl2l11        |
| TC0900003324. mm. 1 | 10.14               | 9.77               | 1.29                                   | 0.0018   | 0.0241    | Bcl9l          |
| TC0300003235. mm. 1 | 5.8                 | 6.08               | -1.22                                  | 0.0041   | 0.0443    | Bglap3         |
| TC0600001203. mm. 1 | 10.85               | 11.11              | -1.19                                  | 0.0024   | 0.0297    | Bhlhe40        |
| TC0600003428. mm. 1 | 7.06                | 7.41               | -1.27                                  | 0.003    | 0.0346    | Bhlhe41        |
| TC1300002437. mm. 1 | 5.36                | 5.65               | -1.23                                  | 0.0018   | 0.0241    | Bhmt2          |
| TC1400002219. mm. 1 | 8.01                | 8.51               | -1.41                                  | 6.60E-05 | 0.0017    | Blk            |
| TC1900001498. mm. 1 | 7.79                | 8.2                | -1.33                                  | 0.0005   | 0.0081    | Blnk           |
| TC1700000420. mm. 1 | 7.86                | 7.67               | 1.14                                   | 0.0046   | 0.0478    | Bnip1          |
| TC0X00002994. mm. 1 | 7.02                | 7.39               | -1.3                                   | 0.001    | 0.0147    | Btk            |
| TC0400002505. mm. 1 | 5.12                | 5.87               | -1.68                                  | 3.42E-05 | 0.001     | Ccl19          |
| TC4_JH584293_random | 5.52                | 6.12               | -1.51                                  | 0.0001   | 0.0025    | Ccl19          |
| TC4_JH584294_random | 5.96                | 6.45               | -1.41                                  | 0.0003   | 0.0063    | Ccl19; Gm2023  |
| TC0400000395. mm. 1 | 5.99                | 6.64               | -1.57                                  | 1.26E-05 | 0.0005    | Ccl19; Gm2457  |
| TC0400000412. mm. 1 | 5.93                | 6.8                | -1.82                                  | 1.05E-05 | 0.0004    | Ccl19; Gm2564  |
| TC0400000389. mm. 1 | 5.8                 | 6.34               | -1.45                                  | 0.0002   | 0.0035    | Ccl19-ps1      |
| TC1100003396. mm. 1 | 14.67               | 15.32              | -1.57                                  | 3.79E-05 | 0.0011    | Ccl5           |
| TC0700004610. mm. 1 | 6.62                | 6.86               | -1.18                                  | 0.0022   | 0.0281    | Cend1; Mir3962 |
| TC0900003169. mm. 1 | 8.81                | 8.29               | 1.44                                   | 0.0032   | 0.0365    | Ccr4           |
| TC1100003696. mm. 1 | 15.77               | 15.32              | 1.36                                   | 0.0007   | 0.0109    | Ccr7           |
| TC0900001670. mm. 1 | 7.8                 | 8.27               | -1.38                                  | 7.80E-05 | 0.002     | Ccr9           |
| TC0300003241. mm. 1 | 8.78                | 9.61               | -1.78                                  | 2.96E-05 | 0.0009    | Cd160          |
| TC1300001155. mm. 1 | 9.18                | 9.95               | -1.71                                  | 3.69E-06 | 0.0002    | Cd180          |
| TC0700004277. mm. 1 | 8.31                | 9.26               | -1.93                                  | 1.27E-05 | 0.0005    | Cd19           |
| TC1600000662. mm. 1 | 8.43                | 9.14               | -1.64                                  | 3.87E-05 | 0.0011    | Cd200r1        |
| TC0800001625. mm. 1 | 6.29                | 7.08               | -1.73                                  | 0.0003   | 0.0064    | Cd209c         |
| TC0700002779. mm. 1 | 7.7                 | 7.93               | -1.18                                  | 0.0045   | 0.0475    | Cd22           |
| TC1800000909. mm. 1 | 12.2                | 12.46              | -1.2                                   | 0.0016   | 0.0217    | Cd226          |
| TC1000000402. mm. 1 | 10.26               | 10.78              | -1.43                                  | 0.0036   | 0.0402    | Cd24a          |
| TC0600003140. mm. 1 | 14.41               | 14.05              | 1.28                                   | 0.0005   | 0.0084    | Cd27; Mir8113  |
| TC1100004052. mm. 1 | 6.48                | 6.78               | -1.23                                  | 0.0033   | 0.0372    | Cd300c         |
| TC1100004060. mm. 1 | 7.01                | 7.39               | -1.31                                  | 0.0008   | 0.0122    | Cd3001f        |
| TC0700002950. mm. 1 | 6.63                | 6.87               | -1.18                                  | 0.0039   | 0.0422    | Cd33           |
| TC0500000468. mm. 1 | 8.58                | 9.5                | -1.89                                  | 4.41E-06 | 0.0002    | Cd38           |
| TC0600003124. mm. 1 | 16.92               | 16.69              | 1.17                                   | 0.0018   | 0.0236    | Cd4            |
| TC0200002544. mm. 1 | 6.24                | 6.49               | -1.18                                  | 0.0047   | 0.0487    | Cd40           |
| TC0X00000533. mm. 1 | 12.91               | 12.49              | 1.34                                   | 0.0001   | 0.0032    | Cd401g         |
| TC1900001113. mm. 1 | 15.89               | 15.53              | 1.29                                   | 0.0003   | 0.0057    | Cd5            |
| TC0100003037. mm. 1 | 13.43               | 13.16              | 1.21                                   | 0.0014   | 0.0196    | Cd55           |
| TC0200001551. mm. 1 | 6.08                | 6.5                | -1.34                                  | 0.0002   | 0.0036    | Cd59b          |
| TC1100004240. mm. 1 | 10.46               | 11.37              | -1.88                                  | 3.96E-05 | 0.0012    | Cd7            |
| TC0400002523. mm. 1 | 9.15                | 9.69               | -1.45                                  | 2.28E-05 | 0.0007    | Cd72           |
| TC1800000617. mm. 1 | 15.2                | 15.95              | -1.68                                  | 7.28E-06 | 0.0003    | Cd74; Mir5107  |
| TC0700000402. mm. 1 | 8.82                | 9.37               | -1.46                                  | 0.0004   | 0.0067    | Cd79a          |
| TC1100003920. mm. 1 | 9.64                | 10.23              | -1.51                                  | 5.11E-05 | 0.0014    | Cd79b          |
| TC1600000553. mm. 1 | 7.28                | 7.75               | -1.38                                  | 0.001    | 0.0155    | Cd80           |
| TSUnmapped00000047. | 7.28                | 7.93               | -1.58                                  | 0.0003   | 0.0053    | Cd83           |
| TC0600003148. mm. 1 | 9.89                | 9.6                | 1.22                                   | 0.0012   | 0.0173    | Cd9            |
| TC1100003037. mm. 1 | 14.04               | 13.71              | 1.26                                   | 0.0004   | 0.008     | Chd3           |
| TC0300002684. mm. 1 | 5.18                | 5.65               | -1.39                                  | 0.0005   | 0.0087    | Chil3          |
| TC0300002685. mm. 1 | 4.84                | 5.16               | -1.25                                  | 0.0035   | 0.0391    | Chil4          |
| TC0200001441. mm. 1 | 5.67                | 6.2                | -1.44                                  | 0.003    | 0.0346    | Chst1          |
| TC0700000991. mm. 1 | 11.82               | 12.49              | -1.59                                  | 1.56E-05 | 0.0006    | Chsy1          |
| TC1600000116. mm. 1 | 6.84                | 7.32               | -1.4                                   | 0.0006   | 0.0102    | Ciita          |
| TC0900001365. mm. 1 | 7.6                 | 8.01               | -1.33                                  | 0.0008   | 0.0134    | Cish           |
| TC0300003080. mm. 1 | 4.99                | 5.25               | -1.19                                  | 0.0042   | 0.0447    | C1ca3b         |
| TC1400001288. mm. 1 | 7.39                | 6.84               | 1.47                                   | 0.0001   | 0.003     | Cldn10         |
| TC0600001521. mm. 1 | 12.06               | 12.31              | -1.19                                  | 0.0031   | 0.0355    | Clec2i         |
| TC0600001401. mm. 1 | 5.59                | 5.88               | -1.22                                  | 0.0045   | 0.0473    | Clec4a2        |
| TC0600001403. mm. 1 | 5.75                | 6.22               | -1.39                                  | 0.0003   | 0.0064    | Clec4a         |
| TC0600003537. mm. 1 | 6.66                | 7.27               | -1.53                                  | 0.0002   | 0.0038    | Clec9a         |
| TC0500003238. mm. 1 | 11.62               | 11.39              | 1.17                                   | 0.0039   | 0.0429    | Clip1          |
| TC1400001331. mm. 1 | 8.84                | 9.19               | -1.27                                  | 0.0013   | 0.0189    | Clybl          |
| TC0400002603. mm. 1 | 8.62                | 9.04               | -1.34                                  | 0.0002   | 0.0034    | Coro2a         |
| TC0100003029. mm. 1 | 13.51               | 13.9               | -1.31                                  | 0.0017   | 0.0228    | Cxcr4          |
| TC0900001672. mm. 1 | 8.67                | 9.3                | -1.55                                  | 0.0002   | 0.0048    | Cxcr6          |
| TC0900001416. mm. 1 | 10.81               | 10.47              | 1.27                                   | 0.0022   | 0.0281    | Dalrd3         |
| TC0200000894. mm. 1 | 12.5                | 11.38              | 2.17                                   | 5.51E-07 | 4.61E-05  | Dapl1          |
| TC0800002569. mm. 1 | 10.3                | 10.03              | 1.2                                    | 0.0018   | 0.024     | Dcaf15         |
| TC1400000304. mm. 1 | 10.49               | 10.28              | 1.16                                   | 0.0037   | 0.041     | Dcpla          |

|                     |       |       |       |          |          |                        |
|---------------------|-------|-------|-------|----------|----------|------------------------|
| TC1000002224. mm. 1 | 11.85 | 12.22 | -1.3  | 0.0037   | 0.0406   | Ddit4                  |
| TC0800000211. mm. 1 | 5.41  | 6.28  | -1.83 | 4.90E-06 | 0.0002   | Defa21                 |
| TC0800000220. mm. 1 | 5.5   | 6.31  | -1.76 | 4.74E-05 | 0.0013   | Defa22                 |
| TC1000003161. mm. 1 | 17.57 | 17.32 | 1.19  | 0.0015   | 0.0201   | Dgka                   |
| TC0800002904. mm. 1 | 10.01 | 9.74  | 1.21  | 0.0015   | 0.0206   | Dhx38                  |
| TC0X00000735. mm. 1 | 11.01 | 11.25 | -1.19 | 0.0028   | 0.0332   | Dkcl                   |
| TC1400001432. mm. 1 | 7.27  | 8.15  | -1.83 | 0.0001   | 0.0029   | Dnasel13               |
| TC1900001547. mm. 1 | 9.29  | 9.02  | 1.21  | 0.0047   | 0.0486   | Dnmbp                  |
| TC0300001245. mm. 1 | 10.43 | 10.14 | 1.22  | 0.0008   | 0.0132   | Dnttip2                |
| TC1300002062. mm. 1 | 7.71  | 8.15  | -1.36 | 0.0003   | 0.0057   | Dok3                   |
| TC1600002182. mm. 1 | 11.01 | 10.78 | 1.17  | 0.0028   | 0.0336   | Donson                 |
| TC0900002720. mm. 1 | 6.51  | 6.87  | -1.28 | 0.0014   | 0.019    | Dppa5a                 |
| TC1700001067. mm. 1 | 5.08  | 4.54  | 1.45  | 0.0018   | 0.0236   | Dreh                   |
| TC0X00001888. mm. 1 | 17.43 | 17.83 | -1.32 | 0.0005   | 0.0095   | Drr1                   |
| TC0100002921. mm. 1 | 7.83  | 7.5   | 1.26  | 0.0039   | 0.0429   | Dse1                   |
| TC0600002629. mm. 1 | 13.35 | 13.07 | 1.21  | 0.0009   | 0.0139   | Duspl1                 |
| TC0200001913. mm. 1 | 12.61 | 12.91 | -1.23 | 0.0024   | 0.0296   | Dusp2                  |
| TC1000002199. mm. 1 | 5.06  | 5.79  | -1.66 | 5.88E-05 | 0.0016   | Dux                    |
| TC1400001872. mm. 1 | 5.41  | 5.81  | -1.31 | 0.0005   | 0.0083   | Ear10                  |
| TC1400000459. mm. 1 | 5.19  | 5.61  | -1.33 | 0.0003   | 0.0057   | Ear12; Ear2; Ear3      |
| TC0700000787. mm. 1 | 5.53  | 5.92  | -1.31 | 0.0005   | 0.0088   | Egfbp2; Klk1b26        |
| TC1000000934. mm. 1 | 6.85  | 6.4   | 1.36  | 0.0016   | 0.0213   | Eid3                   |
| TC1200000829. mm. 1 | 9.45  | 9.18  | 1.2   | 0.0013   | 0.0179   | Eif2b2                 |
| TC0600001606. mm. 1 | 8.95  | 8     | 1.92  | 7.91E-06 | 0.0003   | Emp1                   |
| TC0200005472. mm. 1 | 6.82  | 7.39  | -1.48 | 9.10E-05 | 0.0022   | Eng                    |
| TC1400000975. mm. 1 | 10.15 | 9.19  | 1.95  | 2.04E-06 | 0.0001   | Entpd4                 |
| TC1400000980. mm. 1 | 10.58 | 9.66  | 1.89  | 1.24E-06 | 8.45E-05 | Entpd4; Gm21685        |
| TC1700001299. mm. 1 | 8.14  | 7.47  | 1.59  | 1.05E-05 | 0.0004   | Epas1                  |
| TC0600000444. mm. 1 | 7.95  | 8.23  | -1.21 | 0.0029   | 0.0339   | Ephb6                  |
| TC0700000033. mm. 1 | 8.33  | 7.91  | 1.34  | 0.0007   | 0.0109   | Eps811                 |
| TC1400001086. mm. 1 | 12.75 | 12.97 | -1.16 | 0.0047   | 0.0489   | Epst11                 |
| TC0600003020. mm. 1 | 8.72  | 8.43  | 1.23  | 0.0013   | 0.018    | Erc1                   |
| TC0200003573. mm. 1 | 4.18  | 4.42  | -1.18 | 0.0036   | 0.0399   | Ermn                   |
| TC1700000815. mm. 1 | 5.18  | 5.66  | -1.39 | 0.0047   | 0.0487   | Esp3                   |
| TC1700002092. mm. 1 | 4.85  | 5.3   | -1.36 | 0.0004   | 0.0071   | Esp36                  |
| TC1300002462. mm. 1 | 9.13  | 9.57  | -1.36 | 0.0003   | 0.0065   | F2r                    |
| TC1300002460. mm. 1 | 8.76  | 8.17  | 1.5   | 5.80E-05 | 0.0016   | F2r11                  |
| TC0600003456. mm. 1 | 8.63  | 10.17 | -2.92 | 8.46E-07 | 6.31E-05 | Far2os1; RP23-285C21.5 |
| TC1100002077. mm. 1 | 6.58  | 7.19  | -1.52 | 0.0004   | 0.0077   | Fau-ps2                |
| TC0100001166. mm. 1 | 9.26  | 10.41 | -2.21 | 9.52E-07 | 6.88E-05 | Fcmr                   |
| TC0300000694. mm. 1 | 6.73  | 7.06  | -1.25 | 0.0006   | 0.0098   | Fcr11                  |
| TC0300000695. mm. 1 | 7.71  | 8.34  | -1.54 | 8.74E-05 | 0.0022   | Fcr15                  |
| TC0100003520. mm. 1 | 7.53  | 7.95  | -1.34 | 0.0067   | 0.0004   | Fcrla                  |
| TC0300000843. mm. 1 | 5.62  | 6.38  | -1.69 | 1.77E-05 | 0.0006   | Flg2                   |
| TC0500003626. mm. 1 | 7.31  | 7.52  | -1.16 | 0.0047   | 0.0487   | Flt3                   |
| TC1200002523. mm. 1 | 8.69  | 8.29  | 1.32  | 0.0025   | 0.0303   | Fntb                   |
| TC0600001393. mm. 1 | 10.2  | 9.93  | 1.21  | 0.0028   | 0.0336   | Foxj2; Mir7231         |
| TC1700000214. mm. 1 | 5.13  | 5.47  | -1.26 | 0.0009   | 0.0141   | Fpr2; Fpr3             |
| TC1200000688. mm. 1 | 9.92  | 10.15 | -1.17 | 0.0049   | 0.0499   | Fut8                   |
| TC1300002654. mm. 1 | 5.76  | 6.37  | -1.52 | 0.0026   | 0.031    | Gapt                   |
| TC1700002637. mm. 1 | 7.4   | 7.81  | -1.33 | 0.002    | 0.0261   | Haao                   |
| TC1100000336. mm. 1 | 6.27  | 7.43  | -2.24 | 8.49E-06 | 0.0003   | Hba-a2; Hba-a1         |
| TC0700003909. mm. 1 | 6.39  | 6.93  | -1.46 | 0.0008   | 0.0133   | Hbb-bs; Hbb-b1         |
| TC0700003908. mm. 1 | 6.4   | 7.17  | -1.7  | 1.13E-05 | 0.0004   | Hbb-bt; Hbb-b2; Hbb-b1 |
| TC0500003243. mm. 1 | 6.11  | 6.76  | -1.57 | 0.0038   | 0.042    | Hcar2                  |
| TC0200002308. mm. 1 | 7.05  | 7.46  | -1.33 | 0.0005   | 0.0083   | Hck                    |
| TC0X00002741. mm. 1 | 8.94  | 9.26  | -1.25 | 0.0015   | 0.0207   | Hdac8                  |
| TC0700003622. mm. 1 | 7.89  | 7.52  | 1.29  | 0.0017   | 0.0231   | Hdgfrp3                |
| TC1100003395. mm. 1 | 8.49  | 8.87  | -1.31 | 0.0007   | 0.0118   | Heatr9                 |
| TC1300001353. mm. 1 | 10.57 | 10.87 | -1.23 | 0.0044   | 0.0468   | Hmgcs1                 |
| TC1000000836. mm. 1 | 14.86 | 14.62 | 1.18  | 0.002    | 0.0257   | Hmha1                  |
| TC0600000625. mm. 1 | 4.95  | 5.27  | -1.25 | 0.003    | 0.0352   | Hottip                 |
| TC0500002843. mm. 1 | 6.5   | 6.76  | -1.2  | 0.0013   | 0.0179   | Hpse                   |
| TC0300002553. mm. 1 | 5.39  | 5.74  | -1.28 | 0.0006   | 0.0108   | Hsd3b4; Gm10681        |
| TC1700001936. mm. 1 | 7.12  | 8     | -1.84 | 5.90E-06 | 0.0003   | Hspala                 |
| TC1700001935. mm. 1 | 7.9   | 8.57  | -1.59 | 0.001    | 0.0152   | Hspalb; Hspala         |
| TC0300002680. mm. 1 | 7.83  | 8.27  | -1.36 | 9.97E-05 | 0.0024   | I830077J02Rik          |
| TC0900000184. mm. 1 | 8.49  | 8.79  | -1.23 | 0.0007   | 0.012    | Icam1                  |
| TC0100000490. mm. 1 | 12.94 | 12.71 | 1.18  | 0.0044   | 0.0464   | Icos                   |
| TC1000000778. mm. 1 | 10.05 | 9.45  | 1.51  | 9.49E-05 | 0.0023   | Icos1                  |
| TC1200001544. mm. 1 | 14.52 | 14.91 | -1.31 | 0.0019   | 0.0244   | Id2                    |
| TC0700003581. mm. 1 | 10.13 | 9.7   | 1.35  | 0.0001   | 0.0025   | Idh2                   |
| TC1200002269. mm. 1 | 10.57 | 10.16 | 1.33  | 0.0015   | 0.0201   | Ifi2712a               |
| TC0800002403. mm. 1 | 11.7  | 12.02 | -1.25 | 0.0005   | 0.0093   | Ifi30                  |
| TC1900001422. mm. 1 | 11.77 | 11.1  | 1.6   | 0.0006   | 0.0106   | Ifit1b11               |

|                     |       |       |       |          |          |          |
|---------------------|-------|-------|-------|----------|----------|----------|
| TC1900001423. mm. 1 | 6.72  | 6.3   | 1.34  | 0.0004   | 0.008    | Ifit1b12 |
| TC1900000501. mm. 1 | 9.38  | 9     | 1.3   | 0.0036   | 0.04     | Ifit3    |
| TC1900000502. mm. 1 | 7.77  | 6.95  | 1.76  | 0.0005   | 0.0087   | Ifit3b   |
| TC1000001452. mm. 1 | 10.36 | 11.07 | -1.64 | 4.81E-06 | 0.0002   | Ifng     |
| TC0400000895. mm. 1 | 5.86  | 6.28  | -1.33 | 0.0008   | 0.0122   | Ifnz     |
| TC0300002122. mm. 1 | 11.19 | 10.9  | 1.22  | 0.0007   | 0.0113   | Ifn80    |
| TC0700001008. mm. 1 | 8.6   | 8.96  | -1.28 | 0.001    | 0.0149   | Igflr    |
| TC1200002462. mm. 1 | 4.58  | 5.21  | -1.55 | 0.0035   | 0.0392   | Ighd5-7  |
| TC1200002467. mm. 1 | 4.58  | 5.21  | -1.55 | 0.0035   | 0.0392   | Ighd6-1  |
| TC1200002540. mm. 1 | 9.18  | 8.31  | 1.83  | 9.39E-07 | 6.82E-05 | Ighg1    |
| TC1200002539. mm. 1 | 15.78 | 15.08 | 1.63  | 1.11E-05 | 0.0004   | Ighg2b   |
| TC1200002541. mm. 1 | 7.44  | 7.88  | -1.36 | 8.01E-05 | 0.002    | Ighg3    |
| TC1200002542. mm. 1 | 16.56 | 17.34 | -1.71 | 3.14E-06 | 0.0002   | Ighm     |
| TC0700004207. mm. 1 | 8.32  | 8.68  | -1.28 | 0.0021   | 0.0264   | Igsf6    |
| TC1100004265. mm. 1 | 13.31 | 12.96 | 1.27  | 0.0026   | 0.0317   | Igtp     |
| TC1800000610. mm. 1 | 8.81  | 8.08  | 1.66  | 1.15E-05 | 0.0004   | Iigpl    |
| TC0800001874. mm. 1 | 12.43 | 12.17 | 1.19  | 0.0029   | 0.0338   | Ikbkb    |
| TC0100003057. mm. 1 | 12.81 | 12.5  | 1.25  | 0.0008   | 0.0127   | Ikbke    |
| TC0100002534. mm. 1 | 9.96  | 10.67 | -1.64 | 6.35E-06 | 0.0003   | Ikzf2    |
| TC0100001167. mm. 1 | 6.07  | 6.53  | -1.37 | 0.0025   | 0.0307   | Il10     |
| TC0100000299. mm. 1 | 11.85 | 12.11 | -1.2  | 0.0014   | 0.0192   | Il18r1   |
| TC0100000300. mm. 1 | 10.24 | 10.75 | -1.43 | 6.93E-05 | 0.0018   | Il18rap  |
| TC0200004602. mm. 1 | 5.52  | 5.94  | -1.34 | 0.0046   | 0.0478   | Il1b     |
| TC0100000297. mm. 1 | 10.18 | 9.89  | 1.23  | 0.0032   | 0.0363   | Il1r12   |
| TC0700001794. mm. 1 | 12.47 | 12.12 | 1.28  | 0.001    | 0.0146   | Il21r    |
| TC0600002425. mm. 1 | 6.41  | 5.98  | 1.35  | 0.0009   | 0.0135   | Il23r    |
| TC1500001833. mm. 1 | 14.7  | 15.26 | -1.47 | 4.17E-05 | 0.0012   | Il2rb    |
| TC0700001793. mm. 1 | 14.32 | 14.09 | 1.18  | 0.002    | 0.0254   | Il4ra    |
| TC0600002877. mm. 1 | 6.67  | 6.95  | -1.21 | 0.0038   | 0.0413   | Il5ra    |
| TC1300001265. mm. 1 | 14.7  | 14.25 | 1.37  | 8.91E-05 | 0.0022   | Il6st    |
| TC0100000222. mm. 1 | 11.5  | 11.21 | 1.22  | 0.0047   | 0.0489   | Imp4     |
| TC0400000982. mm. 1 | 10.03 | 9.63  | 1.32  | 0.0002   | 0.0043   | Inad1    |
| TC0100000946. mm. 1 | 9.68  | 9.44  | 1.18  | 0.003    | 0.0346   | Ing5     |
| TC0700001888. mm. 1 | 9.85  | 9.51  | 1.26  | 0.0017   | 0.0224   | Inpp5f   |
| TC1000001691. mm. 1 | 13.38 | 13.04 | 1.26  | 0.0008   | 0.0128   | Ipcefl   |
| TC1300002463. mm. 1 | 12.53 | 12.88 | -1.27 | 0.0005   | 0.0086   | Iqgap2   |
| TC0700000825. mm. 1 | 10.02 | 9.81  | 1.16  | 0.0043   | 0.0455   | Irf3     |
| TC1300000338. mm. 1 | 10.39 | 10.12 | 1.2   | 0.0017   | 0.0226   | Irf4     |
| TC0700004530. mm. 1 | 10.74 | 10.5  | 1.18  | 0.0023   | 0.0283   | Irf7     |
| TC0800000756. mm. 1 | 10.91 | 10.64 | 1.2   | 0.0044   | 0.0465   | Isynal   |
| TC1500002039. mm. 1 | 11.32 | 10.8  | 1.43  | 0.0002   | 0.0035   | Mapk11   |
| TC1300000972. mm. 1 | 8.06  | 8.45  | -1.31 | 0.0003   | 0.0054   | Mef2c    |
| TC0700001739. mm. 1 | 10.82 | 10.49 | 1.25  | 0.0016   | 0.0219   | Mett19   |
| TC0700001192. mm. 1 | 8.92  | 8.54  | 1.29  | 0.0046   | 0.048    | Mex3b    |
| TC1100000874. mm. 1 | 4.15  | 3.91  | 1.19  | 0.0021   | 0.0268   | Mfsd6l   |
| TC1500000666. mm. 1 | 9.25  | 9.02  | 1.17  | 0.0033   | 0.0377   | Micall1  |
| TC1300001941. mm. 1 | 10.49 | 10.23 | 1.19  | 0.0049   | 0.0499   | Mirlet7d |
| TC0700004451. mm. 1 | 11.78 | 12.1  | -1.25 | 0.0008   | 0.0127   | Mki67    |
| TC0900000046. mm. 1 | 5.72  | 6.05  | -1.25 | 0.0034   | 0.0384   | Mmp12    |
| TC1700001596. mm. 1 | 5.99  | 5.63  | 1.28  | 0.0023   | 0.0283   | Mmp25    |
| TC1900000246. mm. 1 | 8.95  | 9.61  | -1.59 | 1.32E-05 | 0.0005   | Mpeg1    |
| TC1100001353. mm. 1 | 9.53  | 9.8   | -1.2  | 0.0019   | 0.0244   | Mpo      |
| TC0X00002470. mm. 1 | 10.35 | 10.01 | 1.27  | 0.0018   | 0.024    | Mpp1     |
| TC0700003060. mm. 1 | 6.02  | 6.53  | -1.42 | 0.0018   | 0.0234   | Mrgpra4  |
| TC0700002401. mm. 1 | 10.99 | 10.71 | 1.21  | 0.0013   | 0.0188   | Mrip-ps  |
| TC0100000845. mm. 1 | 5.79  | 5.99  | -1.15 | 0.0045   | 0.0475   | Mroh2a   |
| TC1900001128. mm. 1 | 8.6   | 9.59  | -1.97 | 1.13E-06 | 7.83E-05 | Ms4a1    |
| TC1900001137. mm. 1 | 7.14  | 7.75  | -1.52 | 0.0003   | 0.0052   | Ms4a6d   |
| TC1000000492. mm. 1 | 8.21  | 7.76  | 1.36  | 0.0026   | 0.0309   | Ms1312   |
| TC0500003618. mm. 1 | 8.41  | 7.95  | 1.38  | 0.0009   | 0.0142   | Mtif3    |
| TC0600002641. mm. 1 | 10.66 | 11.01 | -1.27 | 0.0005   | 0.0093   | Mxd1     |
| TC1000001840. mm. 1 | 12.15 | 11.59 | 1.47  | 2.46E-05 | 0.0008   | Myb      |
| TC1500000453. mm. 1 | 10.43 | 10.83 | -1.32 | 0.0002   | 0.004    | Myc      |
| TC0900000927. mm. 1 | 8.83  | 9.56  | -1.67 | 5.89E-06 | 0.0003   | Myole    |
| TC1700000585. mm. 1 | 11.03 | 11.28 | -1.19 | 0.0017   | 0.0224   | Myo1f    |
| TC1800001176. mm. 1 | 9.42  | 9.67  | -1.19 | 0.0028   | 0.0328   | Mzb1     |
| TC1600001255. mm. 1 | 6.41  | 6.18  | 1.18  | 0.0025   | 0.0302   | Mzt2     |
| TC0500000623. mm. 1 | 9.63  | 9.95  | -1.25 | 0.0011   | 0.0162   | N4bp2    |
| TC0500003685. mm. 1 | 10.41 | 10.12 | 1.22  | 0.0013   | 0.0183   | N4bp211  |
| TC0700000810. mm. 1 | 8.09  | 8.65  | -1.47 | 3.85E-05 | 0.0011   | Napsa    |
| TC0800000694. mm. 1 | 7.84  | 7.33  | 1.42  | 0.0009   | 0.0143   | Nat2     |
| TC0100003129. mm. 1 | 7     | 7.29  | -1.23 | 0.0024   | 0.0292   | Nav1     |
| TC0400000140. mm. 1 | 9.75  | 9.43  | 1.24  | 0.0018   | 0.0241   | Nbn      |
| TC0500003368. mm. 1 | 8.27  | 8.62  | -1.27 | 0.0003   | 0.0061   | Ncf1     |
| TC1200001353. mm. 1 | 11.18 | 10.95 | 1.17  | 0.0033   | 0.0372   | Ncoal    |

|                     |        |        |        |           |         |                       |
|---------------------|--------|--------|--------|-----------|---------|-----------------------|
| TC0200005006. mm. 1 | 12. 12 | 11. 83 | 1. 22  | 0. 0015   | 0. 0201 | Ndrq3                 |
| TC0900000976. mm. 1 | 9. 04  | 9. 72  | -1. 61 | 6. 77E-06 | 0. 0003 | Nedd4                 |
| TC0100002177. mm. 1 | 12. 85 | 12. 01 | 1. 79  | 5. 92E-06 | 0. 0003 | Neur13                |
| TC0200003791. mm. 1 | 10. 2  | 9. 96  | 1. 18  | 0. 004    | 0. 0432 | Nfe2l2                |
| TC1900000689. mm. 1 | 9. 94  | 9. 66  | 1. 21  | 0. 0031   | 0. 0355 | Nfkb2                 |
| TC1700000864. mm. 1 | 10. 55 | 10. 18 | 1. 29  | 0. 0046   | 0. 0485 | Nfkbie                |
| TC1600001742. mm. 1 | 12. 3  | 11. 96 | 1. 27  | 0. 0003   | 0. 0064 | Nfkbiz                |
| TC1300000087. mm. 1 | 6. 16  | 6. 44  | -1. 21 | 0. 0042   | 0. 0454 | Nid1                  |
| TC0700000759. mm. 1 | 13. 73 | 14. 23 | -1. 41 | 8. 11E-05 | 0. 002  | Nkg7                  |
| TC0700000350. mm. 1 | 5. 15  | 5. 41  | -1. 2  | 0. 0025   | 0. 0303 | Nlrp4e                |
| TC0700004656. mm. 1 | 8. 74  | 8. 47  | 1. 2   | 0. 0036   | 0. 0397 | Nmb                   |
| TC1300001812. mm. 1 | 7. 07  | 7. 76  | -1. 61 | 0. 0003   | 0. 0055 | Nrn1                  |
| TC1100000327. mm. 1 | 12. 49 | 12. 21 | 1. 21  | 0. 0012   | 0. 0169 | Nsg2                  |
| TC0700004388. mm. 1 | 9. 9   | 9. 65  | 1. 19  | 0. 002    | 0. 0255 | Nsmce4a               |
| TC0400000374. mm. 1 | 6. 96  | 7. 33  | -1. 29 | 0. 0031   | 0. 036  | Nudt2                 |
| TC1200002053. mm. 1 | 10. 36 | 9. 84  | 1. 43  | 2. 21E-05 | 0. 0007 | Numb                  |
| TC0900002233. mm. 1 | 5. 36  | 5. 6   | -1. 18 | 0. 0028   | 0. 033  | Nxpe2                 |
| TC1600001743. mm. 1 | 11. 76 | 12. 19 | -1. 34 | 0. 001    | 0. 0149 | Nxpe3                 |
| TC0500001349. mm. 1 | 9. 58  | 9. 27  | 1. 23  | 0. 0022   | 0. 028  | Oas1b                 |
| TC1000000140. mm. 1 | 4. 65  | 5. 04  | -1. 31 | 0. 0027   | 0. 0324 | Olig3                 |
| TC0X00000949. mm. 1 | 4. 67  | 4. 89  | -1. 17 | 0. 0029   | 0. 0346 | Otud6a                |
| TC0500001399. mm. 1 | 10. 92 | 11. 36 | -1. 36 | 0. 0003   | 0. 0053 | P2rx7                 |
| TC0300002053. mm. 1 | 5. 34  | 6. 13  | -1. 73 | 0. 0012   | 0. 0168 | P2ryl3                |
| TC1000003152. mm. 1 | 13. 46 | 13. 7  | -1. 18 | 0. 0033   | 0. 0379 | Pa2g4                 |
| TC1900000954. mm. 1 | 12. 38 | 12. 13 | 1. 19  | 0. 0025   | 0. 03   | Pacs1                 |
| TC0400001770. mm. 1 | 8. 45  | 8. 74  | -1. 23 | 0. 0011   | 0. 0156 | Padi2                 |
| TC0400002063. mm. 1 | 10. 04 | 9. 78  | 1. 2   | 0. 0024   | 0. 0294 | Pank4                 |
| TC1500002347. mm. 1 | 9. 48  | 9. 21  | 1. 21  | 0. 0014   | 0. 0197 | Parp10                |
| TC0400002562. mm. 1 | 6. 54  | 6. 93  | -1. 31 | 0. 0002   | 0. 004  | Pax5                  |
| TC1800000359. mm. 1 | 5. 18  | 5. 52  | -1. 27 | 0. 0004   | 0. 0079 | Pcdhb5                |
| TC0100002840. mm. 1 | 9. 85  | 10. 16 | -1. 24 | 0. 0021   | 0. 0269 | Pcdcl1                |
| TC0800002869. mm. 1 | 9. 83  | 9. 6   | 1. 17  | 0. 0045   | 0. 0475 | Pdf; Cog8             |
| TC0200001047. mm. 1 | 12     | 11. 66 | 1. 27  | 0. 001    | 0. 0154 | Pdk1                  |
| TC1100002755. mm. 1 | 8. 35  | 7. 99  | 1. 28  | 0. 0041   | 0. 044  | Pdlim4                |
| TC0900002347. mm. 1 | 11. 1  | 11. 49 | -1. 31 | 0. 0003   | 0. 0065 | Peak1                 |
| TC1100003932. mm. 1 | 13. 07 | 12. 86 | 1. 16  | 0. 0028   | 0. 0336 | Pecam1                |
| TC1100000205. mm. 1 | 14. 77 | 14. 47 | 1. 23  | 0. 0016   | 0. 0215 | Pelil1                |
| TC0300001601. mm. 1 | 7. 85  | 7. 58  | 1. 21  | 0. 0016   | 0. 0215 | Pex2                  |
| TC1700000426. mm. 1 | 12. 43 | 12. 17 | 1. 2   | 0. 0048   | 0. 0496 | Phf1                  |
| TC0200001396. mm. 1 | 11. 31 | 11. 02 | 1. 22  | 0. 0017   | 0. 023  | Phf21a                |
| TC0100000112. mm. 1 | 4. 07  | 4. 43  | -1. 28 | 0. 0022   | 0. 0276 | Pil5                  |
| TC1900001506. mm. 1 | 8. 46  | 8. 87  | -1. 33 | 0. 0009   | 0. 0134 | Pik3ap1               |
| TC1100000009. mm. 1 | 10. 25 | 9. 99  | 1. 19  | 0. 0028   | 0. 0331 | Pik3ip1               |
| TC0200003051. mm. 1 | 14. 26 | 13. 99 | 1. 2   | 0. 0044   | 0. 0464 | Pip4k2a               |
| TC0700004632. mm. 1 | 7. 06  | 7. 75  | -1. 6  | 0. 0002   | 0. 0046 | Piral                 |
| TC0700000030. mm. 1 | 6. 31  | 6. 7   | -1. 31 | 0. 0013   | 0. 0189 | Pira6                 |
| TC0700004631. mm. 1 | 7. 87  | 8. 35  | -1. 39 | 8. 48E-05 | 0. 0021 | Pirb; Piral           |
| TC1600000163. mm. 1 | 6. 45  | 7. 18  | -1. 66 | 0. 0006   | 0. 0103 | Pla2g10os             |
| TC0500002840. mm. 1 | 7. 58  | 8. 16  | -1. 5  | 2. 29E-05 | 0. 0008 | Plac8                 |
| TC0800000286. mm. 1 | 7. 39  | 6. 77  | 1. 54  | 0. 0002   | 0. 005  | Plat                  |
| TC0300002172. mm. 1 | 6. 11  | 6. 72  | -1. 53 | 0. 0042   | 0. 0447 | Platr10               |
| TC1300000799. mm. 1 | 5. 26  | 5. 57  | -1. 25 | 0. 0024   | 0. 0296 | Platr2                |
| TC0600001477. mm. 1 | 5. 86  | 6. 15  | -1. 22 | 0. 0019   | 0. 0247 | Platr31               |
| TC0400002395. mm. 1 | 5. 62  | 6. 13  | -1. 42 | 3. 81E-05 | 0. 0011 | Platr9                |
| TC0600003329. mm. 1 | 8. 89  | 9. 44  | -1. 47 | 5. 90E-05 | 0. 0016 | Plbd1                 |
| TC0800001407. mm. 1 | 8. 05  | 8. 3   | -1. 19 | 0. 0025   | 0. 0308 | Plcg2                 |
| TC1200001272. mm. 1 | 8. 43  | 9. 19  | -1. 69 | 5. 75E-06 | 0. 0003 | Pld4                  |
| TC0200005136. mm. 1 | 6. 85  | 7. 18  | -1. 26 | 0. 001    | 0. 0147 | Pltp                  |
| TC1000002714. mm. 1 | 9. 57  | 9. 83  | -1. 2  | 0. 0015   | 0. 0202 | Plxncl                |
| TC0600002965. mm. 1 | 7. 62  | 7. 15  | 1. 39  | 0. 0004   | 0. 0068 | Plxnd1                |
| TC0200002026. mm. 1 | 6. 88  | 7. 35  | -1. 38 | 0. 0018   | 0. 0237 | Prnd; Prnp; Prn; PRND |
| TC0500000809. mm. 1 | 7. 19  | 7. 54  | -1. 27 | 0. 0012   | 0. 0167 | Pro11                 |
| TC0900001119. mm. 1 | 6. 75  | 7. 32  | -1. 48 | 0. 0008   | 0. 013  | Prss35                |
| TC1800000834. mm. 1 | 7. 35  | 7. 95  | -1. 51 | 4. 73E-05 | 0. 0013 | Pstpip2               |
| TC0400001593. mm. 1 | 5. 86  | 6. 24  | -1. 3  | 0. 0032   | 0. 0365 | Ptafr                 |
| TC0300002595. mm. 1 | 6. 57  | 6. 97  | -1. 32 | 0. 0009   | 0. 0141 | Ptgfrn                |
| TC1500001690. mm. 1 | 6. 98  | 7. 21  | -1. 17 | 0. 0031   | 0. 0359 | Ptk2                  |
| TC0200002602. mm. 1 | 11. 42 | 11. 2  | 1. 17  | 0. 0039   | 0. 0426 | Ptpnl                 |
| TC0200004090. mm. 1 | 9. 13  | 9. 85  | -1. 65 | 5. 30E-05 | 0. 0015 | Ptprj                 |
| TC0500002059. mm. 1 | 7. 52  | 7. 81  | -1. 23 | 0. 0017   | 0. 0225 | Pus7                  |
| TC0700002507. mm. 1 | 11. 16 | 10. 82 | 1. 26  | 0. 001    | 0. 0151 | Pvr                   |
| TC1400000076. mm. 1 | 12. 14 | 11. 94 | 1. 15  | 0. 0048   | 0. 0496 | Pxk                   |
| TC0100003591. mm. 1 | 13. 55 | 13. 25 | 1. 23  | 0. 001    | 0. 0154 | Pydc4                 |
| TC1200001225. mm. 1 | 11. 94 | 11. 66 | 1. 22  | 0. 003    | 0. 0351 | Rcor1                 |
| TSUnmapped00000010. | 9. 81  | 9. 32  | 1. 4   | 0. 0005   | 0. 0092 | Rcor3                 |

|                     |       |       |       |          |          |                          |
|---------------------|-------|-------|-------|----------|----------|--------------------------|
| TC0100003826. mm. 1 | 9.07  | 8.74  | 1.25  | 0.0009   | 0.0138   | Rcor3                    |
| TC0300000807. mm. 1 | 7.3   | 7.99  | -1.61 | 1.01E-05 | 0.0004   | SI00a4                   |
| TC0700003041. mm. 1 | 6.17  | 6.61  | -1.36 | 0.0046   | 0.048    | Saa1                     |
| TC0800000941. mm. 1 | 8.12  | 7.75  | 1.29  | 0.0003   | 0.0055   | Samd1                    |
| TC0400004175. mm. 1 | 5.52  | 6.18  | -1.58 | 4.41E-05 | 0.0013   | Samd11                   |
| TC1000000231. mm. 1 | 9.13  | 9.52  | -1.3  | 0.002    | 0.0252   | Samd3                    |
| TC1600001919. mm. 1 | 8.69  | 8.93  | -1.18 | 0.0036   | 0.0401   | Samsn1                   |
| TC0200000468. mm. 1 | 5.42  | 5.8   | -1.3  | 0.002    | 0.0255   | Sardhos; RP23-171K6.3    |
| TC0100001446. mm. 1 | 7.42  | 8.09  | -1.59 | 0.0015   | 0.0203   | Scarna3a; Mir1843b       |
| TC0700000610. mm. 1 | 8.09  | 8.63  | -1.46 | 0.0033   | 0.0378   | Scgblb19                 |
| TC0700000612. mm. 1 | 7.37  | 7.84  | -1.38 | 0.0004   | 0.0079   | Scgblb20; Scgblb11       |
| TC0700000625. mm. 1 | 4.23  | 4.79  | -1.48 | 0.0014   | 0.0197   | Scgblb26-ps; Scgblb28-ps |
| TC0700000597. mm. 1 | 5.46  | 6.35  | -1.85 | 3.30E-06 | 0.0002   | Scgblb29                 |
| TC0700000591. mm. 1 | 5.78  | 6.51  | -1.65 | 0.0009   | 0.0134   | Scgblb3                  |
| TC0700000592. mm. 1 | 7.28  | 8.17  | -1.86 | 3.55E-06 | 0.0002   | Scgblb7                  |
| TC0700002802. mm. 1 | 5.36  | 6.06  | -1.62 | 0.0041   | 0.0444   | Scgb2b15; Scgb2b17       |
| TC0700002805. mm. 1 | 5.36  | 6.06  | -1.62 | 0.0041   | 0.0444   | Scgb2b15; Scgb2b17       |
| TC0700002815. mm. 1 | 6.47  | 6.84  | -1.29 | 0.0005   | 0.0094   | Scgb2b23-ps              |
| TC0700002796. mm. 1 | 5.61  | 6.03  | -1.34 | 0.0018   | 0.0237   | Scgb2b7                  |
| TC1000000388. mm. 1 | 11.35 | 11.04 | 1.24  | 0.0019   | 0.025    | Scml4                    |
| TC0300002465. mm. 1 | 9.97  | 9.34  | 1.55  | 9.70E-06 | 0.0004   | Scnml                    |
| TC0600002553. mm. 1 | 8.39  | 8.08  | 1.24  | 0.0005   | 0.0091   | Sema4f                   |
| TC1600000307. mm. 1 | 11.64 | 11.4  | 1.19  | 0.0038   | 0.0415   | Senp2                    |
| TC1200002533. mm. 1 | 5.1   | 5.36  | -1.19 | 0.0028   | 0.0335   | Serpinala                |
| TC1200002524. mm. 1 | 7.62  | 8.36  | -1.68 | 4.30E-05 | 0.0012   | Serpina3f                |
| TC1200002525. mm. 1 | 9.69  | 10.52 | -1.78 | 9.64E-06 | 0.0004   | Serpina3g                |
| TC1800001640. mm. 1 | 6.91  | 7.18  | -1.2  | 0.0034   | 0.0383   | Setbp1                   |
| TC0300001958. mm. 1 | 10.4  | 10.15 | 1.2   | 0.0023   | 0.0287   | Setd7                    |
| TC1100004285. mm. 1 | 8.94  | 9.34  | -1.32 | 0.0002   | 0.0044   | Sfil                     |
| TC0200000087. mm. 1 | 8.15  | 8.45  | -1.23 | 0.0007   | 0.0113   | Sfmbt2                   |
| TC1000000171. mm. 1 | 10.1  | 9.79  | 1.24  | 0.0018   | 0.024    | Sgk1                     |
| TC1500002333. mm. 1 | 12.71 | 12.39 | 1.25  | 0.0021   | 0.0262   | Sh3bp1                   |
| TC1400001676. mm. 1 | 10.5  | 10.85 | -1.27 | 0.0035   | 0.0395   | Sh3bp5                   |
| TC0700000757. mm. 1 | 6.47  | 6.85  | -1.3  | 0.0003   | 0.0057   | Siglecg                  |
| TC0700000931. mm. 1 | 7.91  | 8.79  | -1.84 | 1.43E-06 | 9.33E-05 | Siglech                  |
| TC0200001959. mm. 1 | 7.39  | 7.98  | -1.5  | 4.27E-05 | 0.0012   | Sirpa                    |
| TC0300003225. mm. 1 | 5.95  | 6.75  | -1.74 | 7.07E-06 | 0.0003   | Sirpbl1a                 |
| TC0300001674. mm. 1 | 6.01  | 6.88  | -1.83 | 5.99E-05 | 0.0016   | Sirpbl1a; Sirpbl1b       |
| TC0300000210. mm. 1 | 11.83 | 11.6  | 1.17  | 0.0035   | 0.0392   | Skil                     |
| TC1800000805. mm. 1 | 11.04 | 10.69 | 1.27  | 0.0003   | 0.0064   | Smad7                    |
| TC0300000574. mm. 1 | 15.4  | 15.14 | 1.2   | 0.0023   | 0.0282   | Smc4                     |
| TC1700000152. mm. 1 | 5.45  | 6.01  | -1.48 | 0.0006   | 0.0095   | Smok2a                   |
| TC0500003714. mm. 1 | 6.61  | 7.04  | -1.34 | 0.0008   | 0.0124   | Smok3a                   |
| TC0500003715. mm. 1 | 6.54  | 7.08  | -1.46 | 0.0004   | 0.0069   | Smok3b; Smok3a           |
| TC1100003937. mm. 1 | 12.16 | 11.87 | 1.22  | 0.0008   | 0.0134   | Smurf2                   |
| TC0800001976. mm. 1 | 11.78 | 11.1  | 1.6   | 0.0005   | 0.0086   | Snord13                  |
| TSUnmapped00000175. | 11.91 | 11.05 | 1.82  | 0.0005   | 0.0089   | Snord13                  |
| TC0700002993. mm. 1 | 15.42 | 15.7  | -1.21 | 0.0028   | 0.0331   | Snord35a                 |
| TC0700002991. mm. 1 | 11.69 | 12.2  | -1.42 | 0.0007   | 0.0115   | Snord35b                 |
| TC0300002445. mm. 1 | 11.34 | 11.07 | 1.21  | 0.0015   | 0.0203   | Snx27                    |
| TC0900002359. mm. 1 | 9.27  | 9.04  | 1.18  | 0.0028   | 0.0331   | Snx33                    |
| TC0200004756. mm. 1 | 12.49 | 12.81 | -1.25 | 0.0007   | 0.0114   | Snx5                     |
| TC1100004150. mm. 1 | 8.27  | 7.62  | 1.57  | 5.07E-05 | 0.0014   | Socs3                    |
| TC1200000321. mm. 1 | 7.18  | 7.57  | -1.32 | 0.0007   | 0.0119   | Sostdc1                  |
| TC0800003095. mm. 1 | 6.14  | 5.85  | 1.22  | 0.0024   | 0.0295   | Spata21                  |
| TC0500000072. mm. 1 | 6.43  | 7.11  | -1.6  | 0.0002   | 0.004    | Speer1                   |
| TC0500002115. mm. 1 | 5.64  | 6.48  | -1.79 | 3.22E-05 | 0.001    | Speer4a; Gm10471         |
| TC0500002130. mm. 1 | 5.83  | 6.58  | -1.68 | 0.0011   | 0.0158   | Speer4b                  |
| TC0500001980. mm. 1 | 6.13  | 7.34  | -2.3  | 2.98E-06 | 0.0002   | Speer4c                  |
| TC0500001976. mm. 1 | 6.06  | 7.18  | -2.17 | 2.88E-06 | 0.0002   | Speer4c; 4930572003Rik   |
| TC0500000108. mm. 1 | 5.71  | 6.76  | -2.07 | 1.52E-06 | 9.79E-05 | Speer4cos                |
| TC0500000110. mm. 1 | 6.31  | 7.4   | -2.13 | 2.63E-05 | 0.0008   | Speer4d                  |
| TC0500001973. mm. 1 | 6.01  | 7.05  | -2.06 | 0.0003   | 0.0055   | Speer4e                  |
| TC1000000412. mm. 1 | 5.53  | 5.94  | -1.33 | 0.0023   | 0.0287   | Speer5-ps1               |
| TC0500000106. mm. 1 | 6.04  | 7.46  | -2.67 | 4.69E-05 | 0.0013   | Speer8-ps1               |
| TC0200001368. mm. 1 | 7.14  | 7.41  | -1.2  | 0.0031   | 0.036    | Spil                     |
| TC0700002967. mm. 1 | 6.96  | 7.64  | -1.6  | 7.81E-06 | 0.0003   | Spib                     |
| TC1000002647. mm. 1 | 5.36  | 5.92  | -1.47 | 0.0005   | 0.0081   | Spic                     |
| TC0X00002421. mm. 1 | 5.88  | 6.21  | -1.26 | 0.0027   | 0.032    | Spin2d                   |
| TC0X00002017. mm. 1 | 5.11  | 6.84  | -3.31 | 9.97E-07 | 7.13E-05 | Spin2e                   |
| TC0X00002034. mm. 1 | 5.81  | 6.76  | -1.93 | 0.0028   | 0.0328   | Spin2g                   |
| TC0X00000287. mm. 1 | 5.06  | 6.19  | -2.19 | 0.0002   | 0.0046   | Spin2-ps6; 4930408F14Rik |
| TC0700002720. mm. 1 | 8.94  | 8.56  | 1.3   | 0.0017   | 0.0225   | Spint2                   |
| TC1100003147. mm. 1 | 6.37  | 6.6   | -1.17 | 0.0037   | 0.041    | Spns3                    |
| TC0600000957. mm. 1 | 7.15  | 6.92  | 1.18  | 0.0036   | 0.04     | Spr-ps1                  |

|                     |       |       |       |          |          |                  |
|---------------------|-------|-------|-------|----------|----------|------------------|
| TC0300000821. mm. 1 | 5.62  | 6.09  | -1.39 | 0.0005   | 0.0091   | Sprr2a2; Sprr2a1 |
| TC0300000822. mm. 1 | 6.43  | 6.91  | -1.4  | 0.0005   | 0.009    | Sprr2a3; Sprr2a1 |
| TC0300000823. mm. 1 | 5.47  | 5.94  | -1.39 | 0.0004   | 0.0067   | Sprr2b           |
| TC0200000518. mm. 1 | 12.88 | 12.64 | 1.18  | 0.0024   | 0.0292   | Sptan1           |
| TC0500003439. mm. 1 | 11.95 | 11.7  | 1.19  | 0.0033   | 0.0375   | Srrt             |
| TC0X00002922. mm. 1 | 4.75  | 5.91  | -2.22 | 4.93E-05 | 0.0014   | Srsx             |
| TC0X00003385. mm. 1 | 4.97  | 5.42  | -1.36 | 0.0006   | 0.0105   | Ssxb1            |
| TC0X00001802. mm. 1 | 5.63  | 6.07  | -1.36 | 0.0003   | 0.0056   | Ssxb2            |
| TC1600001770. mm. 1 | 8.42  | 8.76  | -1.27 | 0.0021   | 0.0269   | St3ga16          |
| TC0600003383. mm. 1 | 12.65 | 12.28 | 1.29  | 0.0004   | 0.0069   | St8sial          |
| TC1800000758. mm. 1 | 6.73  | 7.02  | -1.22 | 0.0029   | 0.0343   | Stard6           |
| TC1100003790. mm. 1 | 11.99 | 11.73 | 1.2   | 0.0012   | 0.0178   | Stat3            |
| TC1600000507. mm. 1 | 6.05  | 6.54  | -1.41 | 0.0023   | 0.0286   | Stfa211          |
| TC0200005164. mm. 1 | 8.08  | 8.4   | -1.24 | 0.0008   | 0.0127   | Sulf2            |
| TC0700002374. mm. 1 | 5.42  | 5.69  | -1.2  | 0.0013   | 0.0181   | Sult2a3          |
| TC0700002375. mm. 1 | 5.41  | 5.78  | -1.3  | 0.0015   | 0.0203   | Sult2a-ps3       |
| TC1000003158. mm. 1 | 9.14  | 9.41  | -1.2  | 0.0045   | 0.0474   | Suox             |
| TC1000002380. mm. 1 | 7.9   | 8.17  | -1.21 | 0.0023   | 0.0291   | Susd2            |
| TC0700001626. mm. 1 | 8.64  | 8.96  | -1.24 | 0.0044   | 0.0468   | Swap70           |
| TC1300000612. mm. 1 | 7.88  | 8.29  | -1.33 | 0.0001   | 0.0032   | Syk              |
| TC0400003873. mm. 1 | 10.96 | 10.61 | 1.28  | 0.0043   | 0.0456   | Szrd1            |
| TC1700000077. mm. 1 | 14.65 | 14.35 | 1.23  | 0.0024   | 0.0297   | Tagap            |
| TC0600003139. mm. 1 | 11.58 | 11.3  | 1.22  | 0.0013   | 0.0186   | Tapbp1           |
| TC1700000118. mm. 1 | 6.73  | 7.11  | -1.3  | 0.0043   | 0.0456   | Tdgf1-ps2        |
| TC0300002425. mm. 1 | 4.96  | 5.29  | -1.26 | 0.0024   | 0.0294   | Tdpoz1           |
| TC0700002597. mm. 1 | 5.23  | 4.84  | 1.31  | 0.003    | 0.0347   | Tesc1            |
| TC1000001661. mm. 1 | 13.07 | 12.82 | 1.19  | 0.0029   | 0.0337   | Tespa1           |
| TC1000002269. mm. 1 | 8.9   | 9.2   | -1.23 | 0.0034   | 0.0385   | Tet1             |
| TC1100003928. mm. 1 | 9.7   | 10    | -1.23 | 0.0007   | 0.0113   | Tex2             |
| TC1700002481. mm. 1 | 10.75 | 10.39 | 1.29  | 0.0005   | 0.0094   | Tgif1            |
| TC1100002649. mm. 1 | 13.89 | 13.54 | 1.28  | 0.0021   | 0.0265   | Tgtp2            |
| TC1100004148. mm. 1 | 7.38  | 7.07  | 1.24  | 0.0023   | 0.0287   | Tha1             |
| TC0400003681. mm. 1 | 8.66  | 9.14  | -1.4  | 0.0002   | 0.0046   | Themis2          |
| TC0500002480. mm. 1 | 10.89 | 10.52 | 1.29  | 0.0002   | 0.0041   | Tlr1             |
| TC0400003577. mm. 1 | 7.14  | 7.44  | -1.23 | 0.0024   | 0.0292   | Tlr12            |
| TC0400001738. mm. 1 | 10.74 | 10.54 | 1.15  | 0.0046   | 0.0477   | Tmco4            |
| TC1000002992. mm. 1 | 7.53  | 7.82  | -1.22 | 0.0047   | 0.0491   | Tmevpg1          |
| TCX_GL456233 random | 9.9   | 9.49  | 1.33  | 0.0006   | 0.0096   | Tmlhe            |
| TC0300000889. mm. 1 | 6.32  | 7.06  | -1.67 | 1.30E-05 | 0.0005   | Tmod4            |
| TC0500002678. mm. 1 | 4.95  | 5.29  | -1.27 | 0.0003   | 0.0059   | Tmprss11c        |
| TC1500001939. mm. 1 | 7.51  | 7.87  | -1.28 | 0.0005   | 0.0084   | Tnfrsf13c        |
| TC0400002013. mm. 1 | 9.18  | 8.75  | 1.35  | 0.0004   | 0.007    | Tnfrsf25         |
| TC1100002207. mm. 1 | 6.49  | 6.77  | -1.22 | 0.0035   | 0.0396   | Tns3             |
| TC1100003694. mm. 1 | 7.11  | 5.91  | 2.29  | 3.04E-07 | 3.00E-05 | Tns4             |
| TC1500002349. mm. 1 | 7.61  | 7.38  | 1.17  | 0.0034   | 0.0383   | Tonsl            |
| TC0200003355. mm. 1 | 12.29 | 12.05 | 1.18  | 0.0048   | 0.0491   | Traf1            |
| TC0100000897. mm. 1 | 7.83  | 7.63  | 1.15  | 0.0048   | 0.0494   | Traf3ipl         |
| TC1500002111. mm. 1 | 10.91 | 10.66 | 1.18  | 0.0033   | 0.0378   | Twfl             |
| TC0700000364. mm. 1 | 4.99  | 5.64  | -1.56 | 0.0012   | 0.0172   | Vlrd18; Vlrd19   |
| TC0500001880. mm. 1 | 5.37  | 6.17  | -1.74 | 9.82E-05 | 0.0024   | Vlrg10; Vmnlr79  |
| TC1100000899. mm. 1 | 13.14 | 12.78 | 1.28  | 0.0005   | 0.0093   | Vamp2            |
| TC0900001621. mm. 1 | 11.31 | 10.97 | 1.26  | 0.0006   | 0.0104   | Vipr1            |
| TC1000000548. mm. 1 | 11.74 | 11.48 | 1.19  | 0.0028   | 0.0332   | Vsir             |
| TC1400001709. mm. 1 | 8.34  | 9     | -1.59 | 7.92E-06 | 0.0003   | Wdfy4            |
| TC0300001589. mm. 1 | 8.53  | 8.9   | -1.29 | 0.0003   | 0.006    | Wls              |
| TC0400002271. mm. 1 | 10.52 | 10.75 | -1.18 | 0.0047   | 0.0488   | Wwp1             |
| TC1100000072. mm. 1 | 12.28 | 12.02 | 1.2   | 0.0011   | 0.0162   | Xbp1             |
| TC1700002526. mm. 1 | 9.66  | 10.01 | -1.28 | 0.0003   | 0.0061   | Xdh              |
| TC0X00002247. mm. 1 | 6.91  | 7.21  | -1.24 | 0.0028   | 0.0333   | Xlr              |
| TC0X00002418. mm. 1 | 5.95  | 6.37  | -1.34 | 0.0012   | 0.0177   | Xlr3a            |
| TC0X00000676. mm. 1 | 6.7   | 7.32  | -1.53 | 0.0044   | 0.0464   | Xlr3b            |
| TC0X00002424. mm. 1 | 6.95  | 7.44  | -1.41 | 0.0031   | 0.0355   | Xlr3c            |
| TC0X00000723. mm. 1 | 6.47  | 7.22  | -1.69 | 0.0003   | 0.0064   | Xlr3d-ps         |
| TC0700004265. mm. 1 | 13.63 | 13.37 | 1.2   | 0.0016   | 0.0216   | Xpo6             |
| TC1100003570. mm. 1 | 9.62  | 9.29  | 1.26  | 0.0009   | 0.0135   | Xylt2            |
| TC0700001816. mm. 1 | 11.38 | 11.07 | 1.25  | 0.0012   | 0.0178   | Ypel3            |
| TC1100002679. mm. 1 | 8.07  | 7.84  | 1.17  | 0.0032   | 0.037    | Zfp354c          |
| TC1100002835. mm. 1 | 10.02 | 9.72  | 1.23  | 0.0032   | 0.0366   | Zfp39            |
| TC1000000908. mm. 1 | 10.27 | 10.05 | 1.17  | 0.0046   | 0.0478   | Zfp433           |
| TC0400003995. mm. 1 | 6.86  | 7.13  | -1.21 | 0.0034   | 0.0384   | Zfp534           |
| TC0900001834. mm. 1 | 7.35  | 7.15  | 1.15  | 0.004    | 0.0435   | Zfp560           |
| TC0400001878. mm. 1 | 6.61  | 7.27  | -1.57 | 4.91E-05 | 0.0014   | Zfp600           |
| TC0800003231. mm. 1 | 8.6   | 8.37  | 1.18  | 0.0049   | 0.0499   | Zfp617           |
| TC1300002228. mm. 1 | 7.17  | 8.11  | -1.92 | 7.49E-05 | 0.0019   | Zfp640           |
| TC0800000874. mm. 1 | 8.98  | 9.32  | -1.27 | 0.0008   | 0.0122   | Zfp827           |

|                     |       |       |       |        |        |         |
|---------------------|-------|-------|-------|--------|--------|---------|
| TC0200002709. mm. 1 | 12.01 | 11.74 | 1.21  | 0.0017 | 0.023  | Zfp831  |
| TC0800002368. mm. 1 | 10.12 | 9.79  | 1.25  | 0.0025 | 0.0304 | Zfp868  |
| TC0800002369. mm. 1 | 10.85 | 10.55 | 1.23  | 0.0037 | 0.0405 | Zfp869  |
| TC1100000839. mm. 1 | 8.49  | 8.22  | 1.2   | 0.0017 | 0.0225 | Zkscan6 |
| TC0200005155. mm. 1 | 10.78 | 10.57 | 1.16  | 0.0048 | 0.0493 | Zmynd8  |
| TC0800003235. mm. 1 | 11    | 10.72 | 1.22  | 0.0019 | 0.0251 | Znrf1   |
| TC1100000231. mm. 1 | 10.6  | 10.14 | 1.38  | 0.0012 | 0.017  | Zrsr1   |
| TC0700000113. mm. 1 | 4.99  | 5.39  | -1.32 | 0.0017 | 0.0229 | Zscan4c |
| TC0700002323. mm. 1 | 4.68  | 5.29  | -1.52 | 0.0001 | 0.0025 | Zscan4d |
| TC0700000115. mm. 1 | 5.13  | 5.54  | -1.33 | 0.0008 | 0.0126 | Zscan4f |

Table S4: Narrow peaks ChIPseeker annotation of HDAC8 in Teff cells (1)

| name              | signalValue | '-log10pvalue | '-log10qvalue | peak summit | annotation                | geneStart | geneEnd   | geneName |
|-------------------|-------------|---------------|---------------|-------------|---------------------------|-----------|-----------|----------|
| Teff_1_peak_20565 | 4.06257     | 5.34677       | 2.44727       | 106         | Intron (ENSMUST000000256) | 34300075  | 34316677  | Fas      |
| Teff_1_peak_2618  | 3.25006     | 4.00752       | 1.3737        | 123         | Distal Intergenic         | 161781422 | 161788358 | Fasl     |
| Teff_1_peak_5431  | 20.3079     | 41.1946       | 36.2183       | 174         | Intron (ENSMUST000002394) | 118502035 | 118555352 | lfn gas1 |
| Teff_1_peak_5432  | 7.60641     | 11.7718       | 8.1354        | 163         | Distal Intergenic         | 118502035 | 118556525 | lfn gas1 |
| Teff_1_peak_5430  | 4.74045     | 6.40962       | 3.4088        | 134         | Intron (ENSMUST000002394) | 118502035 | 118555352 | lfn gas1 |
| Teff_1_peak_5433  | 3.8722      | 5.18708       | 2.43194       | 163         | Distal Intergenic         | 118502035 | 118556525 | lfn gas1 |
| Teff_1_peak_3616  | 4.87509     | 6.76423       | 3.64202       | 180         | Distal Intergenic         | 19591949  | 19610229  | lfn gr1  |
| Teff_1_peak_8255  | 4.06257     | 5.34677       | 2.44727       | 212         | Promoter (<=1kb)          | 40203131  | 40207062  | lfrd1    |
| Teff_1_peak_33688 | 5.2373      | 7.03074       | 3.87203       | 163         | Distal Intergenic         | 138657089 | 138658544 | lgbp1b   |
| Teff_1_peak_33687 | 4.8739      | 6.76096       | 3.64202       | 115         | Distal Intergenic         | 138657089 | 138658544 | lgbp1b   |
| Teff_1_peak_33686 | 4.06257     | 5.34677       | 2.44727       | 112         | Distal Intergenic         | 138657089 | 138658544 | lgbp1b   |
| Teff_1_peak_39290 | 5.63696     | 7.97698       | 4.75884       | 105         | Intron (ENSMUST000000354) | 65101535  | 65135580  | lgdc4    |
| Teff_1_peak_4809  | 5.68622     | 8.24419       | 4.94201       | 128         | Distal Intergenic         | 87826377  | 87828362  | lglf1os  |
| Teff_1_peak_34858 | 21.1254     | 43.2605       | 38.2193       | 252         | Intron (ENSMUST000000056) | 68148590  | 68187969  | lglf1r   |
| Teff_1_peak_34857 | 10.3968     | 17.5237       | 13.5064       | 131         | Intron (ENSMUST000000056) | 68148590  | 68187969  | lglf1r   |
| Teff_1_peak_34859 | 9.65718     | 16.1589       | 12.2314       | 194         | Promoter (<=1kb)          | 68210259  | 68212926  | lglf1r   |
| Teff_1_peak_34855 | 5.6876      | 8.24801       | 4.94201       | 127         | Intron (ENSMUST000000056) | 67952827  | 68233668  | lglf1r   |
| Teff_1_peak_34856 | 4.06158     | 5.34407       | 2.44727       | 110         | Intron (ENSMUST000000056) | 68148590  | 68187969  | lglf1r   |
| Teff_1_peak_15486 | 8.20741     | 12.8886       | 9.18821       | 116         | Intron (ENSMUST000001000) | 22083942  | 22137209  | lglf2bp2 |
| Teff_1_peak_15485 | 6.32601     | 9.91631       | 6.42252       | 156         | Intron (ENSMUST000001000) | 22059074  | 22089118  | lglf2bp2 |
| Teff_1_peak_15484 | 3.89293     | 4.82424       | 2.09523       | 175         | Intron (ENSMUST000001000) | 22076018  | 22079118  | lglf2bp2 |
| Teff_1_peak_32192 | 4.86616     | 6.742         | 3.64202       | 168         | Intron (ENSMUST000000318) | 49093111  | 49214161  | lglf2bp3 |
| Teff_1_peak_32193 | 4.06257     | 5.34677       | 2.44727       | 231         | Intron (ENSMUST000000318) | 49093111  | 49214161  | lglf2bp3 |
| Teff_1_peak_32191 | 4.06257     | 5.34677       | 2.44727       | 98          | Intron (ENSMUST000000318) | 49107400  | 49111100  | lglf2bp3 |
| Teff_1_peak_17045 | 6.49854     | 9.785         | 6.3163        | 94          | Intron (ENSMUST000001609) | 12682406  | 12769664  | lglf2r   |
| Teff_1_peak_17044 | 4.82859     | 6.63811       | 3.62767       | 108         | Intron (ENSMUST000000245) | 12698527  | 12701279  | lglf2r   |
| Teff_1_peak_1101  | 5.35278     | 7.76387       | 4.56047       | 108         | Distal Intergenic         | 72824503  | 72852474  | lglfbp2  |
| Teff_1_peak_1103  | 4.02382     | 5.24228       | 2.44727       | 100         | Distal Intergenic         | 72824503  | 72852474  | lglfbp2  |
| Teff_1_peak_1102  | 3.89293     | 4.82424       | 2.09523       | 177         | Distal Intergenic         | 72824503  | 72852474  | lglfbp2  |
| Teff_1_peak_1104  | 3.25006     | 4.00752       | 1.3737        | 87          | Distal Intergenic         | 72824503  | 72852474  | lglfbp2  |
| Teff_1_peak_7257  | 6.43812     | 9.61993       | 6.21244       | 145         | Distal Intergenic         | 99041244  | 99054392  | lglfbp4  |
| Teff_1_peak_7256  | 6.33868     | 9.17091       | 5.7961        | 124         | Distal Intergenic         | 99041244  | 99054392  | lglfbp4  |
| Teff_1_peak_9435  | 9.79491     | 16.4512       | 12.4844       | 305         | Distal Intergenic         | 113254830 | 113260236 | lgha     |
| Teff_1_peak_9436  | 6.81263     | 11.0415       | 7.48584       | 311         | Distal Intergenic         | 113254830 | 113260236 | lgha     |
| Teff_1_peak_9434  | 4.53674     | 5.76459       | 2.82567       | 191         | Distal Intergenic         | 113254830 | 113260236 | lgha     |
| Teff_1_peak_9437  | 3.02404     | 4.00811       | 1.37413       | 96          | Downstream (2-3kb)        | 113254830 | 113260236 | lgha     |
| Teff_1_peak_34468 | 5.48614     | 7.97585       | 4.75786       | 101         | Intron (ENSMUST000001079) | 43474186  | 43478233  | lglon5   |
| Teff_1_peak_40563 | 3.25006     | 4.00752       | 1.3737        | 96          | Downstream (1-2kb)        | 49782536  | 49788243  | lgsf1    |
| Teff_1_peak_15791 | 4.82859     | 6.63811       | 3.62767       | 128         | Intron (ENSMUST000002095) | 38892671  | 38924468  | lgsf11   |
| Teff_1_peak_15792 | 4.06257     | 5.34677       | 2.44727       | 177         | Intron (ENSMUST000002095) | 38892671  | 38924468  | lgsf11   |
| Teff_1_peak_15793 | 3.91464     | 4.96478       | 2.22899       | 172         | Intron (ENSMUST000002095) | 38902508  | 38924468  | lgsf11   |
| Teff_1_peak_28685 | 24.8174     | 65.4539       | 59.8419       | 230         | Distal Intergenic         | 140026846 | 140246784 | lgsf21   |
| Teff_1_peak_25632 | 4.78411     | 6.52117       | 3.51573       | 339         | Distal Intergenic         | 101377083 | 101379540 | lgsf3    |
| Teff_1_peak_16814 | 11.3004     | 19.5869       | 15.4588       | 259         | Distal Intergenic         | 96361668  | 96422121  | lgsf5    |
| Teff_1_peak_16818 | 5.6876      | 8.24801       | 4.94201       | 126         | Promoter (2-3kb)          | 96386331  | 96403328  | lgsf5    |
| Teff_1_peak_16815 | 4.63987     | 6.38707       | 3.88873       | 107         | Distal Intergenic         | 96361668  | 96422121  | lgsf5    |
| Teff_1_peak_16817 | 3.95037     | 5.05305       | 2.30734       | 91          | Intron (ENSMUST000001137) | 96386331  | 96403328  | lgsf5    |
| Teff_1_peak_2855  | 5.42499     | 7.63169       | 4.43834       | 108         | Intron (ENSMUST000001395) | 172311771 | 172319841 | lgsf8    |
| Teff_1_peak_19121 | 4.87509     | 6.76423       | 3.64202       | 217         | Promoter (<=1kb)          | 36752355  | 36753454  | lk       |
| Teff_1_peak_5821  | 4.06158     | 5.34407       | 2.44727       | 112         | Intron (ENSMUST000001457) | 11685503  | 11707800  | lkzf1    |
| Teff_1_peak_7246  | 12.1848     | 21.755        | 17.5156       | 182         | Intron (ENSMUST000001031) | 98484267  | 98489020  | lkzf3    |
| Teff_1_peak_7245  | 7.31085     | 11.3767       | 7.75927       | 178         | Promoter (<=1kb)          | 98484267  | 98489020  | lkzf3    |
| Teff_1_peak_7247  | 4.87509     | 6.76423       | 3.64202       | 116         | Intron (ENSMUST000001031) | 98464902  | 98545800  | lkzf3    |
| Teff_1_peak_5668  | 8.24028     | 13.1256       | 9.37352       | 121         | Intron (ENSMUST000002386) | 128630843 | 128669358 | lkzf4    |
| Teff_1_peak_2131  | 5.94102     | 8.42072       | 5.08169       | 137         | Distal Intergenic         | 131019845 | 131024974 | ll10     |
| Teff_1_peak_25102 | 13.9664     | 25.6341       | 21.2176       | 139         | Promoter (2-3kb)          | 68690644  | 68698547  | ll12a    |
| Teff_1_peak_25103 | 11.8124     | 21.8562       | 17.6016       | 122         | Distal Intergenic         | 68694021  | 68698547  | ll12a    |
| Teff_1_peak_25100 | 5.19839     | 7.05527       | 3.88204       | 157         | Distal Intergenic         | 68690644  | 68698547  | ll12a    |
| Teff_1_peak_25101 | 4.87509     | 6.76423       | 3.64202       | 95          | Distal Intergenic         | 68690644  | 68698547  | ll12a    |
| Teff_1_peak_25104 | 4.78411     | 6.52117       | 3.51573       | 107         | Distal Intergenic         | 68694021  | 68698547  | ll12a    |
| Teff_1_peak_32498 | 10.7056     | 20.977        | 16.776        | 142         | Intron (ENSMUST000000184) | 67292018  | 67376188  | ll12rb2  |
| Teff_1_peak_32494 | 10.5601     | 18.1593       | 14.0921       | 142         | Intron (ENSMUST000001174) | 67291318  | 67339694  | ll12rb2  |
| Teff_1_peak_32497 | 6.49854     | 9.785         | 6.3163        | 104         | Intron (ENSMUST000000184) | 67292018  | 67376188  | ll12rb2  |
| Teff_1_peak_32493 | 4.87509     | 6.76423       | 3.64202       | 120         | Intron (ENSMUST000001174) | 67291318  | 67339694  | ll12rb2  |
| Teff_1_peak_32496 | 4.87509     | 6.76423       | 3.64202       | 174         | Promoter (<=1kb)          | 67291318  | 67339694  | ll12rb2  |
| Teff_1_peak_32495 | 4.06257     | 5.34677       | 2.44727       | 107         | Intron (ENSMUST000001174) | 67291318  | 67339694  | ll12rb2  |
| Teff_1_peak_40980 | 5.6876      | 8.24801       | 4.94201       | 111         | Distal Intergenic         | 147383478 | 147403832 | ll13ra2  |
| Teff_1_peak_37426 | 6.50011     | 9.78938       | 6.3163        | 117         | Distal Intergenic         | 82331914  | 82344473  | ll15     |
| Teff_1_peak_21235 | 11.7839     | 21.0232       | 16.8089       | 152         | Promoter (1-2kb)          | 11723164  | 11733968  | ll15ra   |
| Teff_1_peak_267   | 28.438      | 62.4018       | 56.8625       | 175         | Distal Intergenic         | 20730905  | 20734496  | ll17a    |
| Teff_1_peak_33337 | 6.49854     | 9.785         | 6.3163        | 110         | Distal Intergenic         | 120463247 | 120483729 | ll17ra   |
| Teff_1_peak_11969 | 11.3752     | 19.95         | 15.7816       | 239         | Intron (ENSMUST000000353) | 27087765  | 27101491  | ll17rd   |
| Teff_1_peak_11968 | 8.07973     | 12.6436       | 8.96196       | 134         | Intron (ENSMUST000000353) | 27067397  | 27100976  | ll17rd   |
| Teff_1_peak_11967 | 7.85596     | 12.2248       | 8.55132       | 114         | Intron (ENSMUST000000353) | 27067397  | 27100976  | ll17rd   |
| Teff_1_peak_11966 | 3.98676     | 5.14542       | 2.3925        | 115         | Distal Intergenic         | 27038941  | 27107286  | ll17rd   |
| Teff_1_peak_33218 | 5.35278     | 7.76387       | 4.56047       | 116         | Distal Intergenic         | 113458484 | 113470758 | ll17re   |
| Teff_1_peak_603   | 5.6876      | 8.24801       | 4.94201       | 137         | Intron (ENSMUST000001677) | 40466006  | 40500854  | ll18r1   |
| Teff_1_peak_2130  | 4.8739      | 6.76096       | 3.64202       | 186         | Distal Intergenic         | 130932816 | 130940115 | ll19     |
| Teff_1_peak_23134 | 4.06257     | 5.34677       | 2.44727       | 111         | Promoter (1-2kb)          | 129299610 | 129309972 | ll1a     |
| Teff_1_peak_21463 | 6.97254     | 10.4526       | 6.9404        | 111         | Distal Intergenic         | 24291196  | 24293820  | ll1f10   |
| Teff_1_peak_21462 | 4.02382     | 5.24228       | 2.44727       | 103         | Distal Intergenic         | 24153161  | 24160519  | ll1f8    |
| Teff_1_peak_595   | 8.51062     | 13.6178       | 9.83287       | 123         | Intron (ENSMUST000000272) | 40266657  | 40277178  | ll1r1    |
| Teff_1_peak_593   | 7.42628     | 11.2985       | 7.72844       | 331         | Intron (ENSMUST000000272) | 40225080  | 40317257  | ll1r1    |
| Teff_1_peak_592   | 5.6876      | 8.24801       | 4.94201       | 112         | Distal Intergenic         | 40225080  | 40317257  | ll1r1    |
| Teff_1_peak_594   | 4.37955     | 5.76076       | 2.82232       | 104         | Intron (ENSMUST000000272) | 40266657  | 40277178  | ll1r1    |
| Teff_1_peak_589   | 5.2373      | 7.03074       | 3.87203       | 112         | Intron (ENSMUST000001916) | 40084698  | 40125231  | ll1r2    |
| Teff_1_peak_15584 | 7.78586     | 13.379        | 9.61786       | 121         | Intron (ENSMUST000000961) | 26624156  | 26715068  | ll1rap   |
| Teff_1_peak_15582 | 5.19839     | 7.05527       | 3.88204       | 146         | Distal Intergenic         | 26581704  | 26725264  | ll1rap   |
| Teff_1_peak_15583 | 4.06257     | 5.34677       | 2.44727       | 76          | Promoter (1-2kb)          | 26624156  | 26715068  | ll1rap   |
| Teff_1_peak_40729 | 12.6247     | 22.5167       | 18.2394       | 164         | Intron (ENSMUST000001139) | 86747242  | 87890235  | ll1rapl1 |
| Teff_1_peak_40731 | 5.94102     | 8.42072       | 5.08169       | 122         | Distal Intergenic         | 86769118  | 88115645  | ll1rapl1 |
| Teff_1_peak_40727 | 4.87509     | 6.76423       | 3.64202       | 117         | Intron (ENSMUST000001139) | 86747242  | 87890235  | ll1rapl1 |
| Teff_1_peak_40728 | 4.8739      | 6.76096       | 3.64202       | 135         | Intron (ENSMUST000001139) | 86747242  | 87890235  | ll1rapl1 |

|                   |         |         |         |     |                           |           |           |       |
|-------------------|---------|---------|---------|-----|---------------------------|-----------|-----------|-------|
| Teff_1_peak_602   | 6.97254 | 10.4526 | 6.9404  | 132 | Distal Intergenic         | 40429570  | 40446723  | 1r1   |
| Teff_1_peak_601   | 4.58264 | 5.84655 | 2.87288 | 199 | Distal Intergenic         | 40429570  | 40446723  | 1r1   |
| Teff_1_peak_24612 | 17.871  | 35.1453 | 30.3733 | 150 | Promoter (<=1kb)          | 37120523  | 37125959  | 2     |
| Teff_1_peak_24613 | 7.11067 | 10.8439 | 7.3222  | 160 | Distal Intergenic         | 37120523  | 37125959  | 2     |
| Teff_1_peak_3621  | 10.7056 | 20.977  | 16.776  | 158 | Distal Intergenic         | 19712570  | 19760053  | 20ra  |
| Teff_1_peak_39807 | 8.51062 | 13.6178 | 9.83287 | 145 | Intron (ENSMUST000000984) | 100465708 | 100486385 | 20rb  |
| Teff_1_peak_39808 | 8.12514 | 13.0194 | 9.27358 | 317 | Promoter (2-3kb)          | 100465708 | 100486385 | 20rb  |
| Teff_1_peak_35815 | 8.77087 | 14.2462 | 10.4486 | 157 | Intron (ENSMUST000002062) | 125603537 | 125633570 | 21r   |
| Teff_1_peak_35816 | 3.80321 | 4.50137 | 1.82856 | 105 | Intron (ENSMUST000002062) | 125603537 | 125633570 | 21r   |
| Teff_1_peak_28625 | 8.08438 | 16.5758 | 12.5918 | 135 | Distal Intergenic         | 135728172 | 135752140 | 22ra1 |
| Teff_1_peak_3617  | 6.49854 | 9.785   | 6.3163  | 142 | Distal Intergenic         | 19621998  | 19634681  | 22ra2 |
| Teff_1_peak_3618  | 4.58264 | 5.84655 | 2.87288 | 93  | Intron (ENSMUST000000365) | 19621998  | 19634681  | 22ra2 |
| Teff_1_peak_32502 | 11.3752 | 19.95   | 15.7816 | 153 | Intron (ENSMUST000001183) | 67422932  | 67491855  | 23r   |
| Teff_1_peak_32501 | 5.68622 | 8.24419 | 4.94201 | 98  | Intron (ENSMUST000001183) | 67422932  | 67491855  | 23r   |
| Teff_1_peak_2129  | 4.87509 | 6.76423 | 3.64202 | 106 | Distal Intergenic         | 130882074 | 130887454 | 24    |
| Teff_1_peak_35832 | 6.51595 | 9.47786 | 6.09566 | 128 | Distal Intergenic         | 126589010 | 126594941 | 27    |
| Teff_1_peak_21233 | 13.6253 | 29.2751 | 24.7091 | 154 | Promoter (2-3kb)          | 11642807  | 11693193  | 2ra   |
| Teff_1_peak_21234 | 3.80321 | 4.50137 | 1.82856 | 106 | Promoter (<=1kb)          | 11679708  | 11680209  | 2ra   |
| Teff_1_peak_6464  | 4.87509 | 6.76423 | 3.64202 | 113 | Promoter (<=1kb)          | 54265303  | 54267277  | 3     |
| Teff_1_peak_30917 | 14.7655 | 29.4594 | 24.883  | 182 | Intron (ENSMUST000001968) | 123480401 | 123489489 | 31    |
| Teff_1_peak_11492 | 6.54663 | 9.54535 | 6.14107 | 133 | Promoter (1-2kb)          | 112522795 | 112580662 | 31ra  |
| Teff_1_peak_11490 | 5.42108 | 8.78878 | 5.43457 | 264 | Intron (ENSMUST000002238) | 112525846 | 112532344 | 31ra  |
| Teff_1_peak_11491 | 3.25006 | 4.00752 | 1.3737  | 68  | Intron (ENSMUST000002238) | 112522795 | 112580662 | 31ra  |
| Teff_1_peak_6448  | 7.07355 | 11.8301 | 8.19063 | 135 | Distal Intergenic         | 53612460  | 53618669  | 4     |
| Teff_1_peak_29333 | 4.87509 | 6.76423 | 3.64202 | 128 | Intron (ENSMUST000000268) | 30013321  | 30019839  | 6     |
| Teff_1_peak_29332 | 4.06257 | 5.34677 | 2.44727 | 155 | Promoter (<=1kb)          | 30013321  | 30019839  | 6     |
| Teff_1_peak_25433 | 6.50011 | 9.78938 | 6.3163  | 125 | Distal Intergenic         | 89864059  | 89913196  | 6ra   |
| Teff_1_peak_25434 | 3.21906 | 3.9246  | 1.3737  | 61  | Distal Intergenic         | 89864059  | 89913196  | 6ra   |
| Teff_1_peak_24093 | 7.31263 | 11.3816 | 7.75927 | 129 | Distal Intergenic         | 7573182   | 7613760   | 7     |
| Teff_1_peak_24092 | 4.06257 | 5.34677 | 2.44727 | 124 | Intron (ENSMUST000001812) | 7573182   | 7613760   | 7     |
| Teff_1_peak_13646 | 13.8127 | 25.4723 | 21.0571 | 143 | Intron (ENSMUST000002287) | 9511898   | 9529766   | 7r    |
| Teff_1_peak_13647 | 5.6876  | 8.24801 | 4.94201 | 122 | Intron (ENSMUST000001602) | 9516409   | 9530176   | 7r    |
| Teff_1_peak_13645 | 4.8739  | 6.76096 | 3.64202 | 152 | Downstream (1-2kb)        | 9511898   | 9529766   | 7r    |
| Teff_1_peak_2726  | 4.87509 | 6.76423 | 3.64202 | 167 | Intron (ENSMUST000001114) | 166254193 | 166311270 | dr2   |
| Teff_1_peak_38590 | 6.50011 | 9.78938 | 6.3163  | 164 | Promoter (<=1kb)          | 21377126  | 21405090  | f3    |

Table S5: Narrow peaks ChIPseeker annotation of HDAC8 in Teff cells (2)

| name               | signalValue | '-log10pvalue | '-log10qvalue | peak_summit | annotation          | geneStart | geneEnd   | geneName |
|--------------------|-------------|---------------|---------------|-------------|---------------------|-----------|-----------|----------|
| Teff 2_peak 30502  | 3.97432     | 4.94962       | 2.1674        | 120         | Distal Intergenic   | 43662346  | 43740972  | Cc2d2a   |
| Teff 2_peak 30504  | 4.10242     | 5.458         | 2.50376       | 139         | Intron (ENSMUST0000 | 43696582  | 43717017  | Cc2d2a   |
| Teff 2_peak 30503  | 3.98284     | 4.81771       | 2.04745       | 192         | Promoter (<=1kb)    | 43662346  | 43740972  | Cc2d2a   |
| Teff 2_peak 21408  | 13.2761     | 24.5046       | 20.0717       | 149         | Promoter (2-3kb)    | 40774370  | 40778148  | Cc2d2b   |
| Teff 2_peak 20368  | 5.74473     | 8.40906       | 5.0264        | 106         | Distal Intergenic   | 66269021  | 66302741  | Ccbe1    |
| Teff 2_peak 20369  | 6.22957     | 9.18015       | 5.74621       | 127         | Distal Intergenic   | 66269021  | 66302741  | Ccbe1    |
| Teff 2_peak 41579  | 4.17367     | 5.17321       | 2.37415       | 148         | Distal Intergenic   | 121489824 | 121493564 | Cck      |
| Teff 2_peak 41580  | 4.6268      | 7.46535       | 4.22207       | 116         | Distal Intergenic   | 121489824 | 121493564 | Cck      |
| Teff 2_peak 7231   | 5.74473     | 8.40906       | 5.0264        | 109         | Distal Intergenic   | 82176657  | 82179812  | Ccl1     |
| Teff 2_peak 7237   | 14.6038     | 27.761        | 23.2049       | 182         | Distal Intergenic   | 82176657  | 82305690  | Ccl1     |
| Teff 2_peak 7233   | 4.92405     | 6.9017        | 3.72503       | 131         | Intron (ENSMUST0000 | 82176657  | 82305690  | Ccl1     |
| Teff 2_peak 7234   | 5.31046     | 7.1641        | 3.94449       | 161         | Intron (ENSMUST0000 | 82176657  | 82305690  | Ccl1     |
| Teff 2_peak 7235   | 4.92405     | 6.9017        | 3.72503       | 147         | Intron (ENSMUST0000 | 82176657  | 82305690  | Ccl1     |
| Teff 2_peak 7232   | 16.4135     | 31.6871       | 26.9664       | 256         | Intron (ENSMUST0000 | 82176659  | 82179812  | Ccl1     |
| Teff 2_peak 7236   | 4.9679      | 6.90231       | 3.72503       | 125         | Promoter (1-2kb)    | 82176657  | 82305690  | Ccl1     |
| Teff 2_peak 1281   | 4.36614     | 6.20454       | 3.16549       | 219         | Distal Intergenic   | 83116793  | 83119167  | Ccl20    |
| Teff 2_peak 38854  | 11.2936     | 19.5082       | 15.3251       | 132         | Distal Intergenic   | 94745590  | 94751699  | Ccl22    |
| Teff 2_peak 38855  | 3.76453     | 4.61687       | 1.89299       | 80          | Distal Intergenic   | 94745590  | 94751699  | Ccl22    |
| Teff 2_peak 38856  | 9.2933      | 15.2818       | 11.3219       | 209         | Distal Intergenic   | 94745590  | 94751699  | Ccl22    |
| Teff 2_peak 37363  | 7.38436     | 11.5849       | 7.89665       | 147         | Promoter (1-2kb)    | 4332259   | 4334807   | Ccl25    |
| Teff 2_peak 12037  | 3.2827      | 4.09797       | 1.41255       | 162         | Promoter (1-2kb)    | 119623819 | 119654359 | Ccl28    |
| Teff 2_peak 7254   | 8.28196     | 13.0543       | 9.2873        | 145         | Intron (ENSMUST0000 | 83587882  | 83593087  | Ccl6     |
| Teff 2_peak 7252   | 9.04295     | 14.6368       | 10.7517       | 146         | Distal Intergenic   | 83575318  | 83577142  | Ccl9     |
| Teff 2_peak 5953   | 4.92405     | 6.9017        | 3.72503       | 109         | Intron (ENSMUST0000 | 6561230   | 6596742   | Ccm2     |
| Teff 2_peak 14839  | 5.74473     | 8.40906       | 5.0264        | 156         | Distal Intergenic   | 54745702  | 54754039  | Ccn3     |
| Teff 2_peak 15053  | 15.5028     | 30.7666       | 26.0951       | 171         | Intron (ENSMUST0000 | 66909311  | 66919235  | Ccn4     |
| Teff 2_peak 27846  | 7.52906     | 11.528        | 7.88604       | 140         | Intron (ENSMUST0000 | 21727767  | 21748554  | Ccnc     |
| Teff 2_peak 18337  | 3.31903     | 3.7386        | 1.30114       | 172         | Intron (ENSMUST0000 | 47505241  | 47598649  | Ccnd3    |
| Teff 2_peak 18338  | 5.49671     | 7.74757       | 4.49151       | 112         | Intron (ENSMUST0000 | 47505241  | 47598649  | Ccnd3    |
| Teff 2_peak 18339  | 5.54433     | 7.86753       | 4.60879       | 121         | Intron (ENSMUST0000 | 47505241  | 47598649  | Ccnd3    |
| Teff 2_peak 18340  | 4.92291     | 6.89843       | 3.72503       | 127         | Intron (ENSMUST0000 | 47593436  | 47598174  | Ccnd3    |
| Teff 2_peak 23707  | 4.83251     | 6.30984       | 3.26795       | 104         | Promoter (<=1kb)    | 121011055 | 121011756 | Ccndbp1  |
| Teff 2_peak 35515a | 16.8908     | 38.7077       | 33.7558       | 180         | Distal Intergenic   | 38097984  | 38107534  | Ccne1    |
| Teff 2_peak 35515b | 5.86615     | 8.58555       | 5.19271       | 549         | Distal Intergenic   | 38097984  | 38107534  | Ccne1    |
| Teff 2_peak 6480   | 13.1278     | 23.9695       | 19.5727       | 178         | Distal Intergenic   | 40748552  | 40755311  | Ccng1    |
| Teff 2_peak 6481   | 3.47753     | 4.04546       | 1.41255       | 146         | Distal Intergenic   | 40748552  | 40755311  | Ccng1    |
| Teff 2_peak 6482   | 4.92405     | 6.9017        | 3.72503       | 137         | Distal Intergenic   | 40748552  | 40755311  | Ccng1    |
| Teff 2_peak 6483   | 4.10338     | 5.46071       | 2.50376       | 146         | Distal Intergenic   | 40748552  | 40755311  | Ccng1    |
| Teff 2_peak 31302  | 3.82758     | 4.75883       | 2.02433       | 62          | Distal Intergenic   | 93268708  | 93273485  | Ccng2    |
| Teff 2_peak 21409  | 3.47753     | 4.04546       | 1.41255       | 203         | Exon (ENSMUST0000   | 40831279  | 40848572  | Ccnj     |
| Teff 2_peak 21410  | 3.31903     | 3.7386        | 1.30114       | 101         | Intron (ENSMUST0000 | 40831279  | 40848572  | Ccnj     |
| Teff 2_peak 6514   | 6.39177     | 9.49669       | 6.05007       | 140         | Intron (ENSMUST0000 | 43529246  | 43556689  | Ccnjl    |
| Teff 2_peak 6515   | 6.77615     | 10.0428       | 6.48531       | 132         | Intron (ENSMUST0000 | 43529246  | 43556689  | Ccnjl    |
| Teff 2_peak 25861  | 4.10338     | 5.46071       | 2.50376       | 137         | Promoter (2-3kb)    | 65946782  | 65947998  | Ccnl1    |
| Teff 2_peak 7141   | 12.6123     | 22.9075       | 18.548        | 178         | Distal Intergenic   | 78750506  | 78751729  | Ccnq     |
| Teff 2_peak 41625  | 3.2827      | 4.09797       | 1.41255       | 100         | Distal Intergenic   | 123962124 | 123968692 | Ccr1     |
| Teff 2_peak 41626  | 4.87911     | 6.77535       | 3.70633       | 106         | Distal Intergenic   | 123977243 | 123978408 | Ccr1l1   |
| Teff 2_peak 41627  | 20.578      | 43.2871       | 38.1892       | 170         | Distal Intergenic   | 123977243 | 123978408 | Ccr1l1   |
| Teff 2_peak 41628  | 3.98284     | 4.81771       | 2.04745       | 213         | Distal Intergenic   | 124128748 | 124147699 | Ccr5     |
| Teff 2_peak 7551   | 5.74473     | 8.40906       | 5.0264        | 116         | Distal Intergenic   | 99144196  | 99155077  | Ccr7     |
| Teff 2_peak 33443  | 3.2827      | 4.09797       | 1.41255       | 189         | Intron (ENSMUST0000 | 61373997  | 61811178  | Ccser1   |
| Teff 2_peak 33446  | 11.4895     | 20.2764       | 16.0329       | 179         | Intron (ENSMUST0000 | 61570670  | 61820582  | Ccser1   |
| Teff 2_peak 33447  | 6.95506     | 11.272        | 7.64474       | 222         | Intron (ENSMUST0000 | 61570670  | 61820582  | Ccser1   |
| Teff 2_peak 33448  | 5.55691     | 9.01087       | 5.58791       | 124         | Intron (ENSMUST0000 | 61785111  | 61820121  | Ccser1   |
| Teff 2_peak 33449  | 7.96568     | 12.4285       | 8.69114       | 155         | Intron (ENSMUST0000 | 61785111  | 61820121  | Ccser1   |
| Teff 2_peak 33450  | 4.10338     | 5.46071       | 2.50376       | 102         | Intron (ENSMUST0000 | 61785111  | 61820121  | Ccser1   |
| Teff 2_peak 33451  | 4.10338     | 5.46071       | 2.50376       | 190         | Intron (ENSMUST0000 | 61956689  | 62382865  | Ccser1   |
| Teff 2_peak 33452  | 3.2827      | 4.09797       | 1.41255       | 84          | Intron (ENSMUST0000 | 61956689  | 62382865  | Ccser1   |
| Teff 2_peak 33444  | 11.2847     | 19.7813       | 15.58         | 146         | Promoter (<=1kb)    | 61374040  | 61470265  | Ccser1   |
| Teff 2_peak 33445  | 4.92405     | 6.9017        | 3.72503       | 90          | Promoter (1-2kb)    | 61570670  | 61820582  | Ccser1   |
| Teff 2_peak 12577  | 4.64665     | 5.96237       | 2.93175       | 190         | Distal Intergenic   | 36874936  | 36968777  | Ccser2   |
| Teff 2_peak 12573  | 4.92405     | 6.9017        | 3.72503       | 114         | Downstream (<1kb)   | 36879570  | 36886360  | Ccser2   |
| Teff 2_peak 12576  | 6.5654      | 9.97402       | 6.43068       | 143         | Intron (ENSMUST0000 | 36900790  | 36939945  | Ccser2   |
| Teff 2_peak 12575  | 6.02325     | 8.603         | 5.19669       | 177         | Promoter (<=1kb)    | 36878840  | 36906318  | Ccser2   |
| Teff 2_peak 12574  | 4.10338     | 5.46071       | 2.50376       | 148         | Promoter (2-3kb)    | 36878840  | 36906318  | Ccser2   |
| Teff 2_peak 26212  | 5.74339     | 8.40523       | 5.0264        | 446         | Intron (ENSMUST0000 | 88302838  | 88320650  | Cct3     |
| Teff 2_peak 26211  | 5.74473     | 8.40906       | 5.0264        | 128         | Promoter (<=1kb)    | 88302838  | 88320650  | Cct3     |
| Teff 2_peak 30201  | 4.10242     | 5.458         | 2.50376       | 192         | Promoter (<=1kb)    | 25516067  | 25518027  | Cct8l1   |
| Teff 2_peak 32264  | 4.64665     | 5.96237       | 2.93175       | 199         | Promoter (<=1kb)    | 143992478 | 144004159 | Ccz1     |
| Teff 2_peak 4098   | 5.74473     | 8.40906       | 5.0264        | 107         | Distal Intergenic   | 41520044  | 41526876  | Cd164    |
| Teff 2_peak 11723  | 3.98284     | 4.81771       | 2.04745       | 115         | Distal Intergenic   | 102693558 | 102706955 | Cd180    |
| Teff 2_peak 11724  | 3.79795     | 4.49235       | 1.79138       | 105         | Distal Intergenic   | 102693558 | 102706955 | Cd180    |
| Teff 2_peak 11725  | 5.74339     | 8.40523       | 5.0264        | 92          | Intron (ENSMUST0000 | 102693611 | 102739504 | Cd180    |
| Teff 2_peak 37052  | 5.97426     | 8.41633       | 5.0264        | 104         | Distal Intergenic   | 126409362 | 126409796 | Cd19     |
| Teff 2_peak 26195  | 7.30188     | 11.0524       | 7.43798       | 127         | Distal Intergenic   | 86986551  | 86989780  | Cd1d2    |
| Teff 2_peak 26444  | 3.92622     | 4.99313       | 2.20858       | 140         | Promoter (2-3kb)    | 101275899 | 101287939 | Cd2      |
| Teff 2_peak 16484  | 8.20675     | 13.2513       | 9.43183       | 132         | Distal Intergenic   | 45392245  | 45400312  | Cd200    |
| Teff 2_peak 16485  | 9.02533     | 14.9479       | 11.0176       | 136         | Downstream (1-2kb)  | 45392245  | 45400312  | Cd200    |
| Teff 2_peak 16486  | 7.30188     | 11.0524       | 7.43798       | 188         | Intron (ENSMUST0000 | 45392245  | 45400312  | Cd200    |
| Teff 2_peak 16487  | 4.10338     | 5.46071       | 2.50376       | 100         | Promoter (2-3kb)    | 45392245  | 45400312  | Cd200    |
| Teff 2_peak 16475  | 4.47111     | 5.90358       | 2.90631       | 115         | Intron (ENSMUST0000 | 44765826  | 44794344  | Cd200r1  |
| Teff 2_peak 16477  | 5.31046     | 7.1641        | 3.94449       | 112         | Distal Intergenic   | 44965254  | 44966854  | Cd200r3  |
| Teff 2_peak 16476  | 3.76453     | 4.61687       | 1.89299       | 210         | Intron (ENSMUST0000 | 44820728  | 44839150  | Cd200r4  |
| Teff 2_peak 37354  | 9.2933      | 15.2818       | 11.3219       | 362         | Downstream (1-2kb)  | 3743801   | 3748927   | Cd209a   |

|                   |         |         |         |     |                     |           |           |          |
|-------------------|---------|---------|---------|-----|---------------------|-----------|-----------|----------|
| Teff 2_peak 37355 | 3.2827  | 4.09797 | 1.41255 | 93  | Intron (ENSMUST0000 | 3743801   | 3748927   | Cd209a   |
| Teff 2_peak 37360 | 4.92291 | 6.89843 | 3.72503 | 113 | Intron (ENSMUST0000 | 3918677   | 3926813   | Cd209b   |
| Teff 2_peak 37358 | 4.79382 | 6.54641 | 3.48709 | 133 | Distal Intergenic   | 3871824   | 3878555   | Cd209d   |
| Teff 2_peak 37359 | 8.20675 | 13.2513 | 9.43183 | 154 | Distal Intergenic   | 3871824   | 3878555   | Cd209d   |
| Teff 2_peak 37357 | 4.10338 | 5.46071 | 2.50376 | 112 | Distal Intergenic   | 3847965   | 3854309   | Cd209e   |
| Teff 2_peak 37356 | 5.31046 | 7.1641  | 3.94449 | 171 | Intron (ENSMUST0000 | 3847965   | 3854309   | Cd209e   |
| Teff 2_peak 20829 | 4.92291 | 6.89843 | 3.72503 | 108 | Distal Intergenic   | 89206101  | 89207338  | Cd226    |
| Teff 2_peak 20827 | 4.92291 | 6.89843 | 3.72503 | 109 | Intron (ENSMUST0000 | 89206101  | 89207338  | Cd226    |
| Teff 2_peak 20828 | 4.64665 | 5.96237 | 2.93175 | 146 | Intron (ENSMUST0000 | 89206101  | 89207338  | Cd226    |
| Teff 2_peak 2907  | 7.1446  | 13.1601 | 9.38856 | 192 | Intron (ENSMUST0000 | 171579063 | 171585318 | Cd244a   |
| Teff 2_peak 2908  | 4.64665 | 5.96237 | 2.93175 | 95  | Intron (ENSMUST0000 | 171579063 | 171585318 | Cd244a   |
| Teff 2_peak 2768  | 11.4868 | 20.2686 | 16.0329 | 139 | Intron (ENSMUST0000 | 165788765 | 165870249 | Cd247    |
| Teff 2_peak 34523 | 6.95506 | 11.272  | 7.64474 | 123 | Exon (ENSMUST00000  | 125232622 | 125237010 | Cd27     |
| Teff 2_peak 931   | 5.31046 | 7.1641  | 3.94449 | 140 | Intron (ENSMUST0000 | 60746358  | 60773359  | Cd28     |
| Teff 2_peak 18242 | 4.51743 | 5.8824  | 2.89265 | 156 | Distal Intergenic   | 42816264  | 42876665  | Cd2ap    |
| Teff 2_peak 18243 | 5.97426 | 8.41633 | 5.0264  | 92  | Distal Intergenic   | 42816264  | 42876665  | Cd2ap    |
| Teff 2_peak 18244 | 4.51743 | 5.8824  | 2.89265 | 152 | Distal Intergenic   | 42816264  | 42876665  | Cd2ap    |
| Teff 2_peak 18245 | 5.31046 | 7.1641  | 3.94449 | 109 | Distal Intergenic   | 42816264  | 42876665  | Cd2ap    |
| Teff 2_peak 18246 | 4.64665 | 5.96237 | 2.93175 | 131 | Distal Intergenic   | 42816264  | 42876665  | Cd2ap    |
| Teff 2_peak 18241 | 7.24474 | 11.1372 | 7.51869 | 129 | Intron (ENSMUST0000 | 42825421  | 42831030  | Cd2ap    |
| Teff 2_peak 7883  | 6.22845 | 9.08335 | 5.65213 | 115 | Distal Intergenic   | 114890041 | 114904654 | Cd300a   |
| Teff 2_peak 7887  | 5.81779 | 8.13128 | 4.85068 | 95  | Exon (ENSMUST00000  | 115120357 | 115126791 | Cd300if  |
| Teff 2_peak 7888  | 7.16347 | 11.976  | 8.27117 | 103 | Intron (ENSMUST0000 | 115120357 | 115126791 | Cd300if  |
| Teff 2_peak 7890  | 4.64665 | 5.96237 | 2.93175 | 111 | Promoter (<=1kb)    | 115116214 | 115133992 | Cd300if  |
| Teff 2_peak 7889  | 4.52495 | 5.74368 | 2.77404 | 191 | Promoter (2-3kb)    | 115120261 | 115126850 | Cd300if  |
| Teff 2_peak 30085 | 4.17367 | 5.17321 | 2.37415 | 103 | Distal Intergenic   | 17782016  | 17835696  | Cd36     |
| Teff 2_peak 30086 | 5.74473 | 8.40906 | 5.0264  | 101 | Intron (ENSMUST0000 | 17782016  | 17835696  | Cd36     |
| Teff 2_peak 40243 | 5.54433 | 7.86753 | 4.60879 | 105 | Promoter (<=1kb)    | 44969572  | 44980431  | Cd3g     |
| Teff 2_peak 34512 | 3.04976 | 6.1612  | 3.12474 | 129 | Intron (ENSMUST0000 | 124867333 | 124888199 | Cd4      |
| Teff 2_peak 34513 | 3.85728 | 24.2124 | 19.795  | 189 | Intron (ENSMUST0000 | 124867333 | 124888199 | Cd4      |
| Teff 2_peak 34515 | 6.1603  | 15.5774 | 11.6101 | 150 | Promoter (<=1kb)    | 124867333 | 124888199 | Cd4      |
| Teff 2_peak 34514 | 15.3321 | 102.437 | 95.8422 | 234 | Promoter (1-2kb)    | 124867333 | 124888199 | Cd4      |
| Teff 2_peak 23420 | 7.92048 | 12.4712 | 8.72434 | 143 | Distal Intergenic   | 102811141 | 102901665 | Cd44     |
| Teff 2_peak 23419 | 3.96341 | 6.3117  | 3.26967 | 129 | Promoter (1-2kb)    | 102811141 | 102901665 | Cd44     |
| Teff 2_peak 3403  | 3.98284 | 4.81771 | 2.04745 | 130 | Promoter (2-3kb)    | 195036826 | 195092249 | Cd46     |
| Teff 2_peak 16579 | 5.74339 | 8.40523 | 5.0264  | 131 | Distal Intergenic   | 49866833  | 49911091  | Cd47     |
| Teff 2_peak 16580 | 9.2933  | 15.2818 | 11.3219 | 172 | Distal Intergenic   | 49866833  | 49911091  | Cd47     |
| Teff 2_peak 16581 | 6.56388 | 9.96963 | 6.43068 | 119 | Distal Intergenic   | 49866833  | 49911091  | Cd47     |
| Teff 2_peak 16582 | 4.10338 | 5.46071 | 2.50376 | 179 | Distal Intergenic   | 49866833  | 49911091  | Cd47     |
| Teff 2_peak 16583 | 9.02743 | 14.9539 | 11.0176 | 121 | Distal Intergenic   | 49866833  | 49911091  | Cd47     |
| Teff 2_peak 16577 | 3.2827  | 4.09797 | 1.41255 | 98  | Intron (ENSMUST0000 | 49866833  | 49911091  | Cd47     |
| Teff 2_peak 16578 | 8.20675 | 13.2513 | 9.43183 | 169 | Intron (ENSMUST0000 | 49866833  | 49911091  | Cd47     |
| Teff 2_peak 16576 | 4.92405 | 6.9017  | 3.72503 | 123 | Intron (ENSMUST0000 | 49866833  | 49911091  | Cd47     |
| Teff 2_peak 26522 | 5.97426 | 8.41633 | 5.0264  | 217 | Intron (ENSMUST0000 | 106759921 | 106790149 | Cd53     |
| Teff 2_peak 26523 | 3.98284 | 4.81771 | 2.04745 | 153 | Intron (ENSMUST0000 | 106759921 | 106790149 | Cd53     |
| Teff 2_peak 2157  | 4.92291 | 6.89843 | 3.72503 | 116 | Promoter (<=1kb)    | 130440154 | 130448849 | Cd55     |
| Teff 2_peak 2153  | 5.74473 | 8.40906 | 5.0264  | 117 | Distal Intergenic   | 130419601 | 130422740 | Cd55b    |
| Teff 2_peak 2154  | 4.47111 | 5.90358 | 2.90631 | 99  | Distal Intergenic   | 130419601 | 130422740 | Cd55b    |
| Teff 2_peak 2155  | 4.06593 | 5.35599 | 2.50376 | 87  | Intron (ENSMUST0000 | 130419601 | 130422740 | Cd55b    |
| Teff 2_peak 2156  | 4.83609 | 6.65819 | 3.594   | 146 | Intron (ENSMUST0000 | 130419601 | 130422740 | Cd55b    |
| Teff 2_peak 20957 | 4.64665 | 5.96237 | 2.93175 | 111 | Promoter (<=1kb)    | 10789341  | 10830058  | Cd6      |
| Teff 2_peak 20956 | 4.10338 | 5.46071 | 2.50376 | 192 | Promoter (2-3kb)    | 10794564  | 10829856  | Cd6      |
| Teff 2_peak 5848  | 4.92405 | 6.9017  | 3.72503 | 145 | Distal Intergenic   | 128900989 | 128912822 | Cd63     |
| Teff 2_peak 6983  | 12.1548 | 22.4558 | 18.1218 | 148 | Promoter (<=1kb)    | 69664306  | 69666062  | Cd68     |
| Teff 2_peak 34599 | 7.75705 | 12.0436 | 8.3332  | 133 | Distal Intergenic   | 129267325 | 129275436 | Cd69     |
| Teff 2_peak 28167 | 3.2827  | 4.09797 | 1.41255 | 98  | Distal Intergenic   | 43447724  | 43454628  | Cd72     |
| Teff 2_peak 20244 | 4.10242 | 5.458   | 2.50376 | 150 | Distal Intergenic   | 60803848  | 60809253  | Cd74     |
| Teff 2_peak 35301 | 8.97466 | 14.5018 | 10.6298 | 171 | Distal Intergenic   | 24897381  | 24902197  | Cd79a    |
| Teff 2_peak 7671  | 4.65667 | 5.98066 | 2.94866 | 100 | Downstream (<1kb)   | 106311344 | 106314529 | Cd79b    |
| Teff 2_peak 10667 | 6.02325 | 8.603   | 5.19669 | 153 | Distal Intergenic   | 43784775  | 43803132  | Cd83     |
| Teff 2_peak 10668 | 4.10242 | 5.458   | 2.50376 | 170 | Distal Intergenic   | 43785185  | 43803128  | Cd83     |
| Teff 2_peak 2915  | 9.8481  | 16.6943 | 12.6544 | 151 | Intron (ENSMUST0000 | 171840633 | 171886430 | Cd84     |
| Teff 2_peak 16333 | 5.96148 | 9.01831 | 5.58862 | 130 | Intron (ENSMUST0000 | 36603869  | 36606077  | Cd86     |
| Teff 2_peak 16332 | 10.6688 | 18.4693 | 14.3201 | 149 | Intron (ENSMUST0000 | 36603897  | 36604519  | Cd86     |
| Teff 2_peak 34528 | 7.11063 | 10.7008 | 7.11598 | 164 | Exon (ENSMUST00000  | 125460266 | 125494791 | Cd9      |
| Teff 2_peak 21310 | 5.74339 | 8.40523 | 5.0264  | 131 | Distal Intergenic   | 34300075  | 34316677  | Fas      |
| Teff 2_peak 21307 | 4.92405 | 6.9017  | 3.72503 | 146 | Intron (ENSMUST0000 | 34300075  | 34316677  | Fas      |
| Teff 2_peak 21308 | 4.10338 | 5.46071 | 2.50376 | 200 | Intron (ENSMUST0000 | 34300075  | 34316677  | Fas      |
| Teff 2_peak 21309 | 4.92405 | 6.9017  | 3.72503 | 189 | Intron (ENSMUST0000 | 34300075  | 34316677  | Fas      |
| Teff 2_peak 2683  | 4.10338 | 5.46071 | 2.50376 | 109 | Distal Intergenic   | 161780689 | 161788495 | Fasl     |
| Teff 2_peak 2682  | 4.92405 | 6.9017  | 3.72503 | 370 | Promoter (2-3kb)    | 161780689 | 161788495 | Fasl     |
| Teff 2_peak 5570  | 4.64665 | 5.96237 | 2.93175 | 122 | Distal Intergenic   | 118441046 | 118445892 | lfnng    |
| Teff 2_peak 5575  | 5.81779 | 8.13128 | 4.85068 | 93  | Distal Intergenic   | 118502035 | 118556525 | lfnngas1 |
| Teff 2_peak 5574  | 4.10242 | 5.458   | 2.50376 | 107 | Intron (ENSMUST0000 | 118502035 | 118555352 | lfnngas1 |
| Teff 2_peak 5573  | 17.2302 | 33.6584 | 28.8807 | 197 | Intron (ENSMUST0000 | 118502035 | 118555352 | lfnngas1 |
| Teff 2_peak 17305 | 3.31903 | 3.7386  | 1.30114 | 209 | Downstream (1-2kb)  | 91561323  | 91565169  | lfngr2   |
| Teff 2_peak 17297 | 4.10338 | 5.46071 | 2.50376 | 152 | Distal Intergenic   | 91406444  | 91414632  | l 10rb   |
| Teff 2_peak 25909 | 6.02325 | 8.603   | 5.19669 | 120 | Distal Intergenic   | 68690644  | 68698547  | l 12a    |
| Teff 2_peak 25911 | 7.24474 | 11.1372 | 7.51869 | 95  | Distal Intergenic   | 68694021  | 68698547  | l 12a    |
| Teff 2_peak 25910 | 10.2082 | 17.2243 | 13.1606 | 165 | Promoter (2-3kb)    | 68690644  | 68698547  | l 12a    |
| Teff 2_peak 33540 | 6.56388 | 9.96963 | 6.43068 | 129 | Exon (ENSMUST00000  | 67291318  | 67339694  | l 12rb2  |
| Teff 2_peak 33542 | 11.923  | 24.0808 | 19.6682 | 142 | Intron (ENSMUST0000 | 67292018  | 67376188  | l 12rb2  |
| Teff 2_peak 33541 | 4.92291 | 6.89843 | 3.72503 | 316 | Intron (ENSMUST0000 | 67291318  | 67339694  | l 12rb2  |
| Teff 2_peak 33543 | 7.26475 | 10.9834 | 7.39244 | 152 | Promoter (2-3kb)    | 67292018  | 67376188  | l 12rb2  |
| Teff 2_peak 6684  | 6.35075 | 11.0334 | 7.43798 | 124 | Downstream (1-2kb)  | 53631324  | 53634702  | l 13     |
| Teff 2_peak 41852 | 3.97432 | 4.94962 | 2.1674  | 119 | Intron (ENSMUST0000 | 36112110  | 36171259  | l 13ra1  |

|                   |         |         |         |     |                     |           |           |       |
|-------------------|---------|---------|---------|-----|---------------------|-----------|-----------|-------|
| Teff 2_peak 38669 | 8.20675 | 13.2513 | 9.43183 | 117 | Distal Intergenic   | 82331914  | 82344473  | 15    |
| Teff 2_peak 21982 | 4.92405 | 6.9017  | 3.72503 | 169 | Intron (ENSMUST0000 | 11723164  | 11733968  | 15ra  |
| Teff 2_peak 21981 | 11.9485 | 21.3327 | 17.0479 | 198 | Promoter (1-2kb)    | 11723164  | 11733968  | 15ra  |
| Teff 2_peak 268   | 23.7996 | 50.1937 | 44.8763 | 239 | Distal Intergenic   | 20730905  | 20734496  | 17a   |
| Teff 2_peak 269   | 3.76453 | 4.61687 | 1.89299 | 62  | Promoter (1-2kb)    | 20777679  | 20779554  | 17f   |
| Teff 2_peak 34443 | 4.51743 | 5.8824  | 2.89265 | 142 | Distal Intergenic   | 120463247 | 120483729 | 17ra  |
| Teff 2_peak 12404 | 4.92405 | 6.9017  | 3.72503 | 94  | Intron (ENSMUST0000 | 27067397  | 27100976  | 17rd  |
| Teff 2_peak 12405 | 6.85184 | 10.1183 | 6.55995 | 154 | Intron (ENSMUST0000 | 27067397  | 27100976  | 17rd  |
| Teff 2_peak 12406 | 12.3101 | 22.1134 | 17.791  | 234 | Intron (ENSMUST0000 | 27087765  | 27101491  | 17rd  |
| Teff 2_peak 40359 | 3.98284 | 4.81771 | 2.04745 | 144 | Distal Intergenic   | 50575273  | 50581837  | 18    |
| Teff 2_peak 626   | 5.74473 | 8.40906 | 5.0264  | 119 | Intron (ENSMUST0000 | 40466006  | 40500854  | 18r1  |
| Teff 2_peak 628   | 5.31046 | 7.1641  | 3.94449 | 96  | Intron (ENSMUST0000 | 40541692  | 40547903  | 18rap |
| Teff 2_peak 2164  | 4.10338 | 5.46071 | 2.50376 | 116 | Distal Intergenic   | 130932816 | 130940115 | 19    |
| Teff 2_peak 22207 | 5.31046 | 7.1641  | 3.94449 | 107 | Promoter (2-3kb)    | 24186476  | 24193568  | 1f9   |
| Teff 2_peak 610   | 3.31903 | 3.7386  | 1.30114 | 197 | Distal Intergenic   | 40225080  | 40317257  | 1r1   |
| Teff 2_peak 611   | 6.88964 | 10.3039 | 6.73513 | 111 | Distal Intergenic   | 40225080  | 40317257  | 1r1   |
| Teff 2_peak 612   | 3.2827  | 4.09797 | 1.41255 | 107 | Distal Intergenic   | 40225080  | 40317257  | 1r1   |
| Teff 2_peak 613   | 6.02325 | 8.603   | 5.19669 | 112 | Intron (ENSMUST0000 | 40225080  | 40317257  | 1r1   |
| Teff 2_peak 614   | 6.45827 | 10.1292 | 6.5638  | 113 | Intron (ENSMUST0000 | 40266657  | 40277178  | 1r1   |
| Teff 2_peak 615   | 6.63807 | 9.71386 | 6.24177 | 220 | Intron (ENSMUST0000 | 40266657  | 40277178  | 1r1   |
| Teff 2_peak 608   | 3.40043 | 3.8861  | 1.41255 | 229 | Distal Intergenic   | 40074079  | 40112136  | 1r2   |
| Teff 2_peak 609   | 4.10242 | 5.458   | 2.50376 | 100 | Promoter (2-3kb)    | 40084698  | 40125231  | 1r2   |
| Teff 2_peak 16139 | 4.92405 | 6.9017  | 3.72503 | 114 | Intron (ENSMUST0000 | 26727042  | 26728228  | 1rap  |
| Teff 2_peak 16138 | 5.31046 | 7.1641  | 3.94449 | 61  | Promoter (<=1kb)    | 26722434  | 26730117  | 1rap  |
| Teff 2_peak 42068 | 6.5654  | 9.97402 | 6.43068 | 165 | Intron (ENSMUST0000 | 86747242  | 87890235  | 1rap1 |
| Teff 2_peak 42069 | 9.78778 | 16.2169 | 12.225  | 151 | Intron (ENSMUST0000 | 86747242  | 87890235  | 1rap1 |
| Teff 2_peak 621   | 4.10338 | 5.46071 | 2.50376 | 179 | Distal Intergenic   | 40429570  | 40446723  | 1r1   |
| Teff 2_peak 622   | 4.03008 | 5.25891 | 2.45255 | 379 | Distal Intergenic   | 40429570  | 40446723  | 1r1   |
| Teff 2_peak 623   | 7.11063 | 10.7008 | 7.11598 | 118 | Distal Intergenic   | 40429570  | 40446723  | 1r1   |
| Teff 2_peak 625   | 4.10338 | 5.46071 | 2.50376 | 108 | Intron (ENSMUST0000 | 40440628  | 40465396  | 1r1   |
| Teff 2_peak 624   | 5.74473 | 8.40906 | 5.0264  | 118 | Promoter (1-2kb)    | 40429570  | 40446723  | 1r1   |
| Teff 2_peak 616   | 3.31903 | 3.7386  | 1.30114 | 126 | Intron (ENSMUST0000 | 40325611  | 40329171  | 1r2   |
| Teff 2_peak 25398 | 7.92048 | 12.4712 | 8.72434 | 127 | Distal Intergenic   | 37120523  | 37125959  | 2     |
| Teff 2_peak 25397 | 13.9482 | 25.8603 | 21.377  | 148 | Promoter (<=1kb)    | 37120523  | 37125959  | 2     |
| Teff 2_peak 3715  | 8.94221 | 16.1221 | 12.1431 | 175 | Distal Intergenic   | 19712570  | 19760053  | 20ra  |
| Teff 2_peak 41163 | 5.97426 | 8.41633 | 5.0264  | 186 | Intron (ENSMUST0000 | 100465708 | 100486385 | 20rb  |
| Teff 2_peak 41164 | 5.74473 | 8.40906 | 5.0264  | 170 | Intron (ENSMUST0000 | 100465708 | 100486385 | 20rb  |
| Teff 2_peak 37036 | 6.44812 | 9.64692 | 6.19689 | 133 | Intron (ENSMUST0000 | 125603537 | 125633570 | 21r   |
| Teff 2_peak 5566  | 4.92405 | 6.9017  | 3.72503 | 120 | Distal Intergenic   | 118204942 | 118210047 | 22    |
| Teff 2_peak 5567  | 6.63807 | 9.71386 | 6.24177 | 112 | Distal Intergenic   | 118204942 | 118210047 | 22    |
| Teff 2_peak 29576 | 6.84411 | 12.6561 | 8.90588 | 138 | Distal Intergenic   | 135728172 | 135752140 | 22ra1 |
| Teff 2_peak 3712  | 5.31046 | 7.1641  | 3.94449 | 247 | Distal Intergenic   | 19621998  | 19634681  | 22ra2 |
| Teff 2_peak 33546 | 8.20485 | 13.2458 | 9.43183 | 133 | Intron (ENSMUST0000 | 67422932  | 67491855  | 23r   |
| Teff 2_peak 33547 | 6.5654  | 9.97402 | 6.43068 | 160 | Intron (ENSMUST0000 | 67422932  | 67491855  | 23r   |
| Teff 2_peak 38701 | 5.64773 | 8.82844 | 5.41566 | 106 | Intron (ENSMUST0000 | 84041769  | 84042540  | 27ra  |
| Teff 2_peak 21980 | 8.94221 | 16.1221 | 12.1431 | 116 | Promoter (2-3kb)    | 11642807  | 11693191  | 2ra   |
| Teff 2_peak 6698  | 5.74473 | 8.40906 | 5.0264  | 110 | Distal Intergenic   | 54265303  | 54267277  | 3     |
| Teff 2_peak 31914 | 8.39674 | 13.6699 | 9.83431 | 140 | Intron (ENSMUST0000 | 123480401 | 123489489 | 31    |
| Teff 2_peak 11911 | 6.95506 | 11.272  | 7.64474 | 415 | Intron (ENSMUST0000 | 112525846 | 112532344 | 31ra  |
| Teff 2_peak 21233 | 4.10338 | 5.46071 | 2.50376 | 101 | Distal Intergenic   | 29951816  | 29952813  | 33    |
| Teff 2_peak 39127 | 3.76453 | 4.61687 | 1.89299 | 226 | Promoter (<=1kb)    | 110755525 | 110805924 | 34    |
| Teff 2_peak 6683  | 11.7062 | 23.7197 | 19.3462 | 153 | Distal Intergenic   | 53612460  | 53618669  | 4     |
| Teff 2_peak 6681  | 3.96024 | 5.07784 | 2.28876 | 89  | Intron (ENSMUST0000 | 53602982  | 53617224  | 4     |
| Teff 2_peak 6682  | 5.56489 | 7.64554 | 4.39188 | 151 | Promoter (<=1kb)    | 53602982  | 53617224  | 4     |
| Teff 2_peak 24886 | 3.31903 | 3.7386  | 1.30114 | 47  | Distal Intergenic   | 7573182   | 7613760   | 7     |
| Teff 2_peak 24887 | 6.5654  | 9.97402 | 6.43068 | 124 | Distal Intergenic   | 7573182   | 7613760   | 7     |
| Teff 2_peak 24885 | 4.92405 | 6.9017  | 3.72503 | 102 | Intron (ENSMUST0000 | 7573182   | 7613760   | 7     |
| Teff 2_peak 14147 | 3.28194 | 4.09582 | 1.41255 | 89  | Intron (ENSMUST0000 | 9516409   | 9530176   | 7r    |
| Teff 2_peak 14146 | 13.9515 | 25.8697 | 21.377  | 140 | Intron (ENSMUST0000 | 9511898   | 9529766   | 7r    |
| Teff 2_peak 14145 | 6.63807 | 9.71386 | 6.24177 | 108 | Intron (ENSMUST0000 | 9511898   | 9529766   | 7r    |
| Teff 2_peak 10937 | 5.48147 | 7.48443 | 4.24006 | 110 | Intron (ENSMUST0000 | 56479277  | 56482246  | 9     |
| Teff 2_peak 16334 | 4.83609 | 6.65819 | 3.594   | 171 | Intron (ENSMUST0000 | 36694038  | 36726741  | ldr1  |
| Teff 2_peak 39853 | 5.74473 | 8.40906 | 5.0264  | 145 | Promoter (<=1kb)    | 21377126  | 21405090  | f3    |
| Teff 2_peak 39854 | 4.51743 | 5.8824  | 2.89265 | 142 | Promoter (1-2kb)    | 21384218  | 21388030  | f3    |
| Teff 2_peak 5092  | 4.10338 | 5.46071 | 2.50376 | 107 | Downstream (1-2kb)  | 95387667  | 95392967  | Socs2 |
| Teff 2_peak 19113 | 7.11063 | 10.7008 | 7.11598 | 103 | Distal Intergenic   | 87107679  | 87137839  | Socs5 |
| Teff 2_peak 19114 | 5.33286 | 7.48319 | 4.23909 | 127 | Distal Intergenic   | 87107679  | 87137839  | Socs5 |
| Teff 2_peak 20822 | 10.5407 | 17.8476 | 13.755  | 160 | Intron (ENSMUST0000 | 88665224  | 88758491  | Socs6 |
| Teff 2_peak 20820 | 3.98284 | 4.81771 | 2.04745 | 210 | Intron (ENSMUST0000 | 88665224  | 88758491  | Socs6 |
| Teff 2_peak 20821 | 6.02325 | 8.603   | 5.19669 | 103 | Promoter (1-2kb)    | 88665224  | 88758491  | Socs6 |

Table S6: Narrow peaks ChIPseeker annotation of HDAC8 in Teff cells (3)

| name               | signalValue | <sup>-</sup> log10pvalue | <sup>-</sup> log10qvalue | peak_summit | annotation         | geneStart | geneEnd   | geneName |
|--------------------|-------------|--------------------------|--------------------------|-------------|--------------------|-----------|-----------|----------|
| Teff_3_peak_7464   | 7.05578     | 11.6449                  | 8.1365                   | 110         | Distal Intergenic  | 82176657  | 82305690  | Ccl1     |
| Teff_3_peak_7465   | 5.67971     | 7.87313                  | 4.72643                  | 154         | Distal Intergenic  | 82176657  | 82305690  | Ccl1     |
| Teff_3_peak_7462   | 5.67971     | 7.87313                  | 4.72643                  | 75          | Intron (ENSMUST000 | 82176659  | 82179812  | Ccl1     |
| Teff_3_peak_7463   | 13.2276     | 25.2647                  | 21.1312                  | 122         | Intron (ENSMUST000 | 82176659  | 82179812  | Ccl1     |
| Teff_3_peak_7460   | 5.82851     | 8.65643                  | 5.39801                  | 90          | Promoter (2-3kb)   | 82057823  | 82062955  | Ccl11    |
| Teff_3_peak_40601  | 4.96975     | 6.57871                  | 3.52008                  | 72          | Distal Intergenic  | 94810453  | 94812036  | Ccl17    |
| Teff_3_peak_1401   | 6.38967     | 9.21819                  | 5.92099                  | 141         | Distal Intergenic  | 83116766  | 83119166  | Ccl20    |
| Teff_3_peak_1402   | 7.15447     | 11.2639                  | 7.81453                  | 89          | Distal Intergenic  | 83116766  | 83119166  | Ccl20    |
| Teff_3_peak_1403   | 4.40986     | 6.4949                   | 3.4655                   | 141         | Distal Intergenic  | 83116793  | 83119167  | Ccl20    |
| Teff_3_peak_1404   | 6.05378     | 8.89083                  | 5.62235                  | 121         | Distal Intergenic  | 83116793  | 83119167  | Ccl20    |
| Teff_3_peak_40599  | 12.2732     | 22.9215                  | 18.8843                  | 134         | Distal Intergenic  | 94745590  | 94751699  | Ccl22    |
| Teff_3_peak_38940  | 11.4124     | 19.8174                  | 15.8785                  | 142         | Intron (ENSMUST000 | 4349588   | 4357993   | Ccl25    |
| Teff_3_peak_12391  | 5.29103     | 8.14461                  | 4.91462                  | 73          | Intron (ENSMUST000 | 119649516 | 119651156 | Ccl28    |
| Teff_3_peak_12390  | 8.81973     | 15.3473                  | 11.6033                  | 94          | Promoter (1-2kb)   | 119623819 | 119654359 | Ccl28    |
| Teff_3_peak_12392  | 5.29103     | 8.14461                  | 4.91462                  | 88          | Promoter (1-2kb)   | 119649516 | 119651156 | Ccl28    |
| Teff_3_peak_7484   | 5.67971     | 7.87313                  | 4.72643                  | 75          | Promoter (1-2kb)   | 83647844  | 83649355  | Ccl3     |
| Teff_3_peak_7479   | 5.50344     | 7.75885                  | 4.64312                  | 112         | Promoter (<=1kb)   | 83525778  | 83530518  | Ccl5     |
| Teff_3_peak_7482   | 7.09964     | 10.6086                  | 7.18149                  | 163         | Intron (ENSMUST000 | 83587882  | 83593087  | Ccl6     |
| Teff_3_peak_7481   | 4.25978     | 5.34154                  | 2.48427                  | 84          | Promoter (<=1kb)   | 83587882  | 83593087  | Ccl6     |
| Teff_3_peak_7461   | 4.40986     | 6.4949                   | 3.4655                   | 223         | Distal Intergenic  | 82115185  | 82116799  | Ccl8     |
| Teff_3_peak_7480a  | 9.98583     | 16.6443                  | 12.8592                  | 155         | Distal Intergenic  | 83575318  | 83577142  | Ccl9     |
| Teff_3_peak_7480b  | 11.17189    | 20.902                   | 16.9364                  | 544         | Distal Intergenic  | 83575318  | 83577142  | Ccl9     |
| Teff_3_peak_43696  | 6.66115     | 10.2576                  | 6.85385                  | 243         | Distal Intergenic  | 123977243 | 123978408 | Ccr11    |
| Teff_3_peak_43410  | 4.92235     | 6.48454                  | 3.4655                   | 116         | Intron (ENSMUST000 | 114491779 | 114496038 | Ccr4     |
| Teff_3_peak_43697  | 3.52735     | 4.9183                   | 2.11459                  | 41          | Intron (ENSMUST000 | 124128748 | 124147699 | Ccr5     |
| Teff_3_peak_18293  | 5.52054     | 7.80724                  | 4.68311                  | 105         | Promoter (<=1kb)   | 8236043   | 8256108   | Ccr6     |
| Teff_3_peak_18294  | 7.8096      | 12.0402                  | 8.49867                  | 99          | Promoter (<=1kb)   | 8236212   | 8257141   | Ccr6     |
| Teff_3_peak_18292  | 5.82851     | 8.65643                  | 5.39801                  | 102         | Promoter (1-2kb)   | 8236043   | 8256108   | Ccr6     |
| Teff_3_peak_43588  | 15.2257     | 28.6964                  | 24.4616                  | 292         | Distal Intergenic  | 120092114 | 120094906 | Ccr8     |
| Teff_3_peak_36761  | 5.8412      | 9.13862                  | 5.86439                  | 90          | Distal Intergenic  | 24743983  | 24760311  | Cd177    |
| Teff_3_peak_12052  | 4.96975     | 6.57871                  | 3.52008                  | 80          | Distal Intergenic  | 102693558 | 102706955 | Cd180    |
| Teff_3_peak_12053  | 9.70021     | 17.2565                  | 13.4304                  | 95          | Distal Intergenic  | 102693558 | 102706955 | Cd180    |
| Teff_3_peak_26925  | 8.56535     | 14.3858                  | 10.7187                  | 97          | Downstream (2-3kb) | 86995834  | 86997947  | Cd1d1    |
| Teff_3_peak_26924  | 5.29184     | 8.14792                  | 4.91462                  | 82          | Distal Intergenic  | 86986551  | 86989780  | Cd1d2    |
| Teff_3_peak_27103  | 15.8202     | 30.4076                  | 26.1215                  | 105         | Distal Intergenic  | 101275899 | 101287939 | Cd2      |
| Teff_3_peak_17176  | 8.46364     | 13.5312                  | 9.89627                  | 98          | Distal Intergenic  | 45392245  | 45400312  | Cd200    |
| Teff_3_peak_17177  | 26.475      | 127.639                  | 121.661                  | 187         | Distal Intergenic  | 45392245  | 45400312  | Cd200    |
| Teff_3_peak_17178  | 7.93775     | 13.4733                  | 9.85683                  | 82          | Promoter (2-3kb)   | 45392245  | 45400312  | Cd200    |
| Teff_3_peak_17172  | 3.52735     | 4.9183                   | 2.11459                  | 76          | Intron (ENSMUST000 | 44867097  | 44915840  | Cd200r2  |
| Teff_3_peak_17171  | 6.60413     | 10.0602                  | 6.67267                  | 89          | Promoter (2-3kb)   | 44867097  | 44915840  | Cd200r2  |
| Teff_3_peak_17170  | 6.17381     | 9.86754                  | 6.4921                   | 88          | Promoter (1-2kb)   | 44820728  | 44839150  | Cd200r4  |
| Teff_3_peak_38934  | 4.96975     | 6.57871                  | 3.52008                  | 91          | Downstream (1-2kb) | 3743801   | 3748927   | Cd209a   |
| Teff_3_peak_38939  | 5.67971     | 7.87313                  | 4.72643                  | 73          | Promoter (<=1kb)   | 4134098   | 4137516   | Cd209g   |
| Teff_3_peak_21510  | 4.94256     | 7.11533                  | 4.02182                  | 94          | Intron (ENSMUST000 | 89197330  | 89207052  | Cd226    |
| Teff_3_peak_21511  | 5.29184     | 8.14792                  | 4.91462                  | 82          | Intron (ENSMUST000 | 89206101  | 89207338  | Cd226    |
| Teff_3_peak_3135   | 9.90619     | 17.7217                  | 13.8788                  | 119         | Intron (ENSMUST000 | 171579063 | 171585318 | Cd244a   |
| Teff_3_peak_3003   | 3.56637     | 4.2029                   | 1.62158                  | 39          | Promoter (<=1kb)   | 165788681 | 165871153 | Cd247    |
| Teff_3_peak_4399   | 18.4591     | 36.8848                  | 32.4354                  | 288         | Distal Intergenic  | 43578284  | 43579197  | Cd24a    |
| Teff_3_peak_4400   | 10.8244     | 18.9339                  | 15.0531                  | 102         | Distal Intergenic  | 43578284  | 43579197  | Cd24a    |
| Teff_3_peak_35935  | 8.67514     | 13.9984                  | 10.3379                  | 89          | Distal Intergenic  | 125232622 | 125237010 | Cd27     |
| Teff_3_peak_986    | 6.38967     | 9.21819                  | 5.92099                  | 91          | Intron (ENSMUST000 | 60746358  | 60773359  | Cd28     |
| Teff_3_peak_31037  | 6.17286     | 9.86367                  | 6.4921                   | 85          | Intron (ENSMUST000 | 17782016  | 17835696  | Cd36     |
| Teff_3_peak_42080  | 9.47627     | 16.3962                  | 12.6294                  | 135         | Promoter (<=1kb)   | 44969572  | 44980431  | Cd3g     |
| Teff_3_peak_35931  | 8.23619     | 27.6783                  | 23.4732                  | 124         | Promoter (2-3kb)   | 124867333 | 124888199 | Cd4      |
| Teff_3_peak_24047  | 30.371      | 102.493                  | 96.9088                  | 173         | Promoter (1-2kb)   | 102811141 | 102901665 | Cd44     |
| Teff_3_peak_3678   | 11.4639     | 21.1961                  | 17.2103                  | 113         | Intron (ENSMUST000 | 195041835 | 195069114 | Cd46     |
| Teff_3_peak_17264  | 11.3594     | 19.708                   | 15.7709                  | 279         | Distal Intergenic  | 49866833  | 49911091  | Cd47     |
| Teff_3_peak_17265  | 9.70021     | 17.2565                  | 13.4304                  | 106         | Distal Intergenic  | 49866833  | 49911091  | Cd47     |
| Teff_3_peak_17261  | 3.85241     | 4.62535                  | 1.99578                  | 101         | Intron (ENSMUST000 | 49855366  | 49911091  | Cd47     |
| Teff_3_peak_17262  | 7.0547      | 11.6405                  | 8.1365                   | 100         | Promoter (1-2kb)   | 49866833  | 49911091  | Cd47     |
| Teff_3_peak_17263  | 6.17381     | 9.86754                  | 6.4921                   | 89          | Promoter (2-3kb)   | 49866833  | 49911091  | Cd47     |
| Teff_3_peak_27198  | 8.32644     | 13.6072                  | 9.9597                   | 100         | Distal Intergenic  | 106759921 | 106790149 | Cd53     |
| Teff_3_peak_2412   | 5.29184     | 8.14792                  | 4.91462                  | 96          | Distal Intergenic  | 130419601 | 130422740 | Cd55b    |
| Teff_3_peak_2413   | 3.85241     | 4.62535                  | 1.99578                  | 187         | Distal Intergenic  | 130419601 | 130422740 | Cd55b    |
| Teff_3_peak_2414   | 7.48606     | 11.558                   | 8.09739                  | 103         | Promoter (1-2kb)   | 130388537 | 130423009 | Cd55b    |
| Teff_3_peak_24073a | 4.55565     | 6.77297                  | 3.70269                  | 69          | Intron (ENSMUST000 | 104095801 | 104115349 | Cd59a    |
| Teff_3_peak_24073b | 6.66447     | 14.475                   | 10.807                   | 271         | Intron (ENSMUST000 | 104095801 | 104115349 | Cd59a    |
| Teff_3_peak_21586  | 3.52789     | 4.92049                  | 2.11459                  | 76          | Intron (ENSMUST000 | 10794564  | 10829856  | Cd6      |
| Teff_3_peak_36024  | 8.8055      | 15.0582                  | 11.36                    | 203         | Distal Intergenic  | 129267325 | 129275436 | Cd69     |
| Teff_3_peak_8219   | 7.05578     | 11.6449                  | 8.1365                   | 212         | Promoter (1-2kb)   | 121036747 | 121039418 | Cd7      |
| Teff_3_peak_7903   | 3.82208     | 4.74621                  | 2.11442                  | 129         | Downstream (<1kb)  | 106311344 | 106314529 | Cd79b    |
| Teff_3_peak_38879  | 13.3223     | 24.5518                  | 20.4528                  | 98          | Intron (ENSMUST000 | 143052739 | 143067934 | Cd81     |
| Teff_3_peak_17020  | 7.09964     | 10.6086                  | 7.18149                  | 79          | Intron (ENSMUST000 | 36603869  | 36666077  | Cd86     |
| Teff_3_peak_17021  | 8.25516     | 13.7649                  | 10.1104                  | 126         | Intron (ENSMUST000 | 36603869  | 36666077  | Cd86     |
| Teff_3_peak_17018  | 7.93775     | 13.4733                  | 9.85683                  | 216         | Intron (ENSMUST000 | 36603897  | 36604519  | Cd86     |
| Teff_3_peak_17019  | 6.17381     | 9.86754                  | 6.4921                   | 188         | Intron (ENSMUST000 | 36603897  | 36604519  | Cd86     |
| Teff_3_peak_34917  | 3.33058     | 4.23708                  | 1.63193                  | 80          | Exon (ENSMUST000   | 71322788  | 71337494  | Cd8b1    |
| Teff_3_peak_34916  | 7.09964     | 10.6086                  | 7.18149                  | 91          | Promoter (<=1kb)   | 71322788  | 71337494  | Cd8b1    |
| Teff_3_peak_35939  | 6.51854     | 11.7023                  | 8.19319                  | 114         | Distal Intergenic  | 125462116 | 125463024 | Cd9      |
| Teff_3_peak_35940  | 5.10989     | 7.47587                  | 4.37033                  | 85          | Distal Intergenic  | 125462116 | 125463024 | Cd9      |
| Teff_3_peak_35941  | 6.74163     | 9.96522                  | 6.58591                  | 87          | Intron (ENSMUST000 | 125460266 | 125494791 | Cd9      |
| Teff_3_peak_21973  | 5.67971     | 7.87313                  | 4.72643                  | 75          | Distal Intergenic  | 34300075  | 34316677  | Fas      |
| Teff_3_peak_2911   | 4.40986     | 6.4949                   | 3.4655                   | 77          | Distal Intergenic  | 161780689 | 161788495 | Fas1     |
| Teff_3_peak_2912   | 8.81973     | 15.3473                  | 11.6033                  | 123         | Distal Intergenic  | 161780689 | 161788495 | Fas1     |
| Teff_3_peak_2910   | 6.17286     | 9.86367                  | 6.4921                   | 104         | Downstream (2-3kb) | 161781422 | 161788358 | Fas1     |

|                    |         |         |         |     |                    |           |           |         |
|--------------------|---------|---------|---------|-----|--------------------|-----------|-----------|---------|
| Teff 3_peak 5832   | 5.82851 | 8.65643 | 5.39801 | 170 | Distal Intergenic  | 118441046 | 118445892 | lfng    |
| Teff 3_peak 5833   | 5.29184 | 8.14792 | 4.91462 | 81  | Distal Intergenic  | 118441046 | 118445892 | lfng    |
| Teff 3_peak 5834   | 4.25978 | 5.34154 | 2.48427 | 89  | Distal Intergenic  | 118441046 | 118445892 | lfng    |
| Teff 3_peak 5838   | 13.3223 | 24.5518 | 20.4528 | 132 | Distal Intergenic  | 118502035 | 118556525 | lfngas1 |
| Teff 3_peak 5839   | 4.40275 | 5.62147 | 2.74648 | 162 | Distal Intergenic  | 118502035 | 118556525 | lfngas1 |
| Teff 3_peak 5840   | 7.09784 | 10.8113 | 7.37327 | 83  | Distal Intergenic  | 118502035 | 118556525 | lfngas1 |
| Teff 3_peak 5841   | 9.93949 | 16.5488 | 12.7662 | 97  | Distal Intergenic  | 118502035 | 118556525 | lfngas1 |
| Teff 3_peak 5837   | 4.95309 | 6.66767 | 3.59937 | 80  | Intron (ENSMUST000 | 118502035 | 118555352 | lfngas1 |
| Teff 3_peak 5835   | 15.8731 | 31.5738 | 27.2616 | 92  | Intron (ENSMUST000 | 118502035 | 118555352 | lfngas1 |
| Teff 3_peak 5836   | 4.40986 | 6.4949  | 3.4655  | 85  | Intron (ENSMUST000 | 118502035 | 118555352 | lfngas1 |
| Teff 3_peak 2417   | 13.3223 | 24.5518 | 20.4528 | 162 | Distal Intergenic  | 131019845 | 131024974 | 10      |
| Teff 3_peak 18006  | 5.67971 | 7.87313 | 4.72643 | 112 | Intron (ENSMUST000 | 91406444  | 91414632  | 10rb    |
| Teff 3_peak 26617  | 5.29184 | 8.14792 | 4.91462 | 115 | Distal Intergenic  | 68690644  | 68698547  | 12a     |
| Teff 3_peak 26618  | 4.99586 | 7.11293 | 4.0208  | 88  | Distal Intergenic  | 68690644  | 68698547  | 12a     |
| Teff 3_peak 26619a | 4.94256 | 7.11533 | 4.02182 | 101 | Distal Intergenic  | 68694021  | 68698547  | 12a     |
| Teff 3_peak 26619b | 14.1993 | 26.3307 | 22.1625 | 282 | Distal Intergenic  | 68694021  | 68698547  | 12a     |
| Teff 3_peak 34868  | 4.95309 | 6.66767 | 3.59937 | 145 | Intron (ENSMUST000 | 67292018  | 67376188  | 12rb2   |
| Teff 3_peak 34867  | 3.52789 | 4.92049 | 2.11459 | 22  | Intron (ENSMUST000 | 67291318  | 67339694  | 12rb2   |
| Teff 3_peak 6955   | 6.82605 | 10.7251 | 7.29485 | 86  | Downstream (1-2kb) | 53631324  | 53634702  | 13      |
| Teff 3_peak 44227  | 5.29103 | 8.14461 | 4.91462 | 81  | Intron (ENSMUST000 | 36112110  | 36171259  | 13ra1   |
| Teff 3_peak 44228  | 6.05378 | 8.89083 | 5.62235 | 96  | Intron (ENSMUST000 | 36112110  | 36171259  | 13ra1   |
| Teff 3_peak 45287  | 17.6395 | 35.9109 | 31.4793 | 176 | Distal Intergenic  | 147383478 | 147403832 | 13ra2   |
| Teff 3_peak 45288  | 6.17286 | 9.86367 | 6.4921  | 85  | Intron (ENSMUST000 | 147383478 | 147403832 | 13ra2   |
| Teff 3_peak 22697  | 6.17381 | 9.86754 | 6.4921  | 86  | Distal Intergenic  | 11705290  | 11734317  | 15ra    |
| Teff 3_peak 22698  | 4.96975 | 6.57871 | 3.52008 | 84  | Intron (ENSMUST000 | 11705848  | 11733249  | 15ra    |
| Teff 3_peak 37834  | 6.17381 | 9.86754 | 6.4921  | 80  | Exon (ENSMUST0000  | 83649576  | 83655325  | 16      |
| Teff 3_peak 37838  | 5.10989 | 7.47587 | 4.37033 | 91  | Promoter (1-2kb)   | 83722510  | 83739937  | 16      |
| Teff 3_peak 270    | 6.17381 | 9.86754 | 6.4921  | 205 | Distal Intergenic  | 20730905  | 20734496  | 17a     |
| Teff 3_peak 12765  | 5.29184 | 8.14792 | 4.91462 | 89  | Intron (ENSMUST000 | 27087765  | 27101491  | 17rd    |
| Teff 3_peak 12766  | 5.99575 | 9.198   | 5.92099 | 84  | Promoter (1-2kb)   | 27087765  | 27101491  | 17rd    |
| Teff 3_peak 42220  | 5.67971 | 7.87313 | 4.72643 | 82  | Distal Intergenic  | 50575273  | 50581837  | 18      |
| Teff 3_peak 38106  | 3.50663 | 4.83586 | 2.11459 | 37  | Promoter (<=1kb)   | 102015315 | 102018690 | 18bp    |
| Teff 3_peak 642    | 4.99071 | 6.59507 | 3.53514 | 73  | Intron (ENSMUST000 | 40466006  | 40500854  | 18r1    |
| Teff 3_peak 644    | 4.99586 | 7.11293 | 4.0208  | 146 | Intron (ENSMUST000 | 40515362  | 40551705  | 18rap   |
| Teff 3_peak 645    | 5.82851 | 8.65643 | 5.39801 | 128 | Intron (ENSMUST000 | 40515362  | 40551705  | 18rap   |
| Teff 3_peak 643    | 4.25978 | 5.34154 | 2.48427 | 88  | Intron (ENSMUST000 | 40515362  | 40551705  | 18rap   |
| Teff 3_peak 22890  | 5.67971 | 7.87313 | 4.72643 | 80  | Distal Intergenic  | 24291196  | 24293820  | 1f10    |
| Teff 3_peak 637    | 10.9465 | 19.3181 | 15.4007 | 138 | Distal Intergenic  | 40225080  | 40317257  | 1r1     |
| Teff 3_peak 638    | 10.2111 | 17.2399 | 13.4304 | 81  | Distal Intergenic  | 40225080  | 40317257  | 1r1     |
| Teff 3_peak 639    | 11.657  | 20.7773 | 16.8176 | 155 | Intron (ENSMUST000 | 40266657  | 40277178  | 1r1     |
| Teff 3_peak 633a   | 15.3909 | 29.1494 | 24.9098 | 127 | Distal Intergenic  | 40074079  | 40112136  | 1r2     |
| Teff 3_peak 633b   | 26.5337 | 57.3123 | 52.4599 | 554 | Distal Intergenic  | 40074079  | 40112136  | 1r2     |
| Teff 3_peak 634    | 4.96975 | 6.57871 | 3.52008 | 92  | Intron (ENSMUST000 | 40084698  | 40125231  | 1r2     |
| Teff 3_peak 635    | 3.52735 | 4.9183  | 2.11459 | 70  | Promoter (2-3kb)   | 40084698  | 40125231  | 1r2     |
| Teff 3_peak 16826  | 9.65268 | 18.2254 | 14.3607 | 91  | Distal Intergenic  | 26581704  | 26725264  | 1rap    |
| Teff 3_peak 16827  | 7.4938  | 11.9096 | 8.38827 | 102 | Intron (ENSMUST000 | 26624156  | 26715068  | 1rap    |
| Teff 3_peak 16828  | 6.17381 | 9.86754 | 6.4921  | 90  | Intron (ENSMUST000 | 26722434  | 26730117  | 1rap    |
| Teff 3_peak 16829  | 4.99586 | 7.11293 | 4.0208  | 81  | Intron (ENSMUST000 | 26722434  | 26730117  | 1rap    |
| Teff 3_peak 16830  | 5.29184 | 8.14792 | 4.91462 | 109 | Intron (ENSMUST000 | 26727042  | 26728228  | 1rap    |
| Teff 3_peak 44721  | 6.66115 | 10.2576 | 6.85385 | 111 | Distal Intergenic  | 86769118  | 88115645  | 1rap1   |
| Teff 3_peak 44718  | 5.29184 | 8.14792 | 4.91462 | 145 | Intron (ENSMUST000 | 86747242  | 87890235  | 1rap1   |
| Teff 3_peak 44719  | 16.6529 | 32.4056 | 28.0653 | 176 | Intron (ENSMUST000 | 86747242  | 87890235  | 1rap1   |
| Teff 3_peak 45180  | 5.29184 | 8.14792 | 4.91462 | 103 | Distal Intergenic  | 137570608 | 138846946 | 1rap2   |
| Teff 3_peak 641    | 11.236  | 19.3773 | 15.4563 | 122 | Distal Intergenic  | 40429570  | 40446723  | 1r1     |
| Teff 3_peak 22891  | 8.98884 | 14.5141 | 10.8433 | 144 | Distal Intergenic  | 24345348  | 24346354  | 1rn     |
| Teff 3_peak 26089  | 19.0626 | 38.9834 | 34.4849 | 127 | Distal Intergenic  | 37120523  | 37125959  | 2       |
| Teff 3_peak 26088  | 9.70021 | 17.2565 | 13.4304 | 95  | Promoter (<=1kb)   | 37120523  | 37125959  | 2       |
| Teff 3_peak 3987   | 7.70481 | 12.4996 | 8.93984 | 127 | Distal Intergenic  | 19712570  | 19760053  | 20ra    |
| Teff 3_peak 3988   | 3.52735 | 4.9183  | 2.11459 | 120 | Distal Intergenic  | 19712570  | 19760053  | 20ra    |
| Teff 3_peak 30427  | 11.0095 | 21.4816 | 17.474  | 107 | Distal Intergenic  | 135728172 | 135752140 | 22ra1   |
| Teff 3_peak 3983   | 24.6915 | 53.9818 | 49.1824 | 276 | Distal Intergenic  | 19621998  | 19634681  | 22ra2   |
| Teff 3_peak 34871  | 9.7017  | 17.2626 | 13.4304 | 113 | Intron (ENSMUST000 | 67422932  | 67491855  | 23r     |
| Teff 3_peak 38554  | 5.99008 | 8.44561 | 5.20726 | 187 | Promoter (1-2kb)   | 126589010 | 126594941 | 27      |
| Teff 3_peak 22695  | 6.58765 | 10.0385 | 6.65643 | 108 | Distal Intergenic  | 11642807  | 11693193  | 2ra     |
| Teff 3_peak 22696  | 9.11469 | 14.9493 | 11.2708 | 192 | Promoter (2-3kb)   | 11642807  | 11693193  | 2ra     |
| Teff 3_peak 15838  | 3.85241 | 4.62535 | 1.99578 | 133 | Distal Intergenic  | 78479256  | 78495271  | 2rb     |
| Teff 3_peak 6965   | 6.17381 | 9.86754 | 6.4921  | 80  | Distal Intergenic  | 54265303  | 54267277  | 3       |
| Teff 3_peak 6966   | 5.29184 | 8.14792 | 4.91462 | 80  | Promoter (1-2kb)   | 54265303  | 54267277  | 3       |
| Teff 3_peak 33090  | 5.70619 | 7.92666 | 4.77616 | 78  | Intron (ENSMUST000 | 123480401 | 123489489 | 31      |
| Teff 3_peak 12248  | 7.05578 | 11.6449 | 8.1365  | 105 | Intron (ENSMUST000 | 112522795 | 112580662 | 31ra    |
| Teff 3_peak 12247  | 6.86222 | 10.2574 | 6.85385 | 80  | Intron (ENSMUST000 | 112523557 | 112562074 | 31ra    |
| Teff 3_peak 21910  | 3.52789 | 4.92049 | 2.11459 | 79  | Distal Intergenic  | 29951816  | 29952813  | 33      |
| Teff 3_peak 40880  | 7.70481 | 12.4996 | 8.93984 | 95  | Intron (ENSMUST000 | 110755236 | 110790888 | 34      |
| Teff 3_peak 6954   | 21.1279 | 46.6864 | 42.0369 | 316 | Distal Intergenic  | 53612460  | 53618669  | 4       |
| Teff 3_peak 25565  | 5.29184 | 8.14792 | 4.91462 | 103 | Distal Intergenic  | 7573182   | 7613760   | 7       |
| Teff 3_peak 25566  | 6.17381 | 9.86754 | 6.4921  | 80  | Distal Intergenic  | 7573182   | 7613760   | 7       |
| Teff 3_peak 14676  | 5.29103 | 8.14461 | 4.91462 | 100 | Intron (ENSMUST000 | 9516409   | 9530176   | 7r      |
| Teff 3_peak 14675  | 7.0547  | 11.6405 | 8.1365  | 99  | Intron (ENSMUST000 | 9511898   | 9529766   | 7r      |
| Teff 3_peak 14674  | 6.66115 | 10.2576 | 6.85385 | 115 | Intron (ENSMUST000 | 9511898   | 9529766   | 7r      |
| Teff 3_peak 11239  | 4.8603  | 6.72367 | 3.65433 | 72  | Downstream (1-2kb) | 56479277  | 56482246  | 9       |
| Teff 3_peak 16580  | 6.09765 | 8.96271 | 5.69345 | 105 | Distal Intergenic  | 10782240  | 10785536  | Socs1   |
| Teff 3_peak 16581  | 12.0694 | 21.3279 | 17.3227 | 94  | Distal Intergenic  | 10782240  | 10785536  | Socs1   |
| Teff 3_peak 16579  | 5.54714 | 7.61096 | 4.50306 | 122 | Intron (ENSMUST000 | 10782240  | 10785536  | Socs1   |
| Teff 3_peak 21504  | 6.66115 | 10.2576 | 6.85385 | 104 | Intron (ENSMUST000 | 88665224  | 88758491  | Socs6   |

Table S7: Narrow peaks ChIPseeker annotation of HDAC8 in Treg cells (1)

| name               | signalValue | '-log10pvalue | '-log10qvalue | peak summit | annotation         | geneStart | geneEnd   | geneName |
|--------------------|-------------|---------------|---------------|-------------|--------------------|-----------|-----------|----------|
| Treg_1_peak_12060  | 13.192      | 23.8427       | 19.8383       | 160         | Distal Intergenic  | 82176657  | 82305690  | Ccl1     |
| Treg_1_peak_12057  | 6.89044     | 10.3071       | 7.07804       | 210         | Intron (ENSMUST000 | 82176657  | 82305690  | Ccl1     |
| Treg_1_peak_12058  | 3.08117     | 3.58522       | 1.34861       | 100         | Intron (ENSMUST000 | 82176657  | 82305690  | Ccl1     |
| Treg_1_peak_12056  | 4.74975     | 6.43314       | 3.57669       | 117         | Intron (ENSMUST000 | 82176657  | 82305690  | Ccl1     |
| Treg_1_peak_12053  | 8.47322     | 13.5001       | 10.0067       | 199         | Intron (ENSMUST000 | 82176659  | 82179812  | Ccl1     |
| Treg_1_peak_12054  | 26.19       | 56.4623       | 51.6429       | 212         | Intron (ENSMUST000 | 82176659  | 82179812  | Ccl1     |
| Treg_1_peak_12055  | 5.54138     | 7.86          | 4.82256       | 151         | Intron (ENSMUST000 | 82176659  | 82179812  | Ccl1     |
| Treg_1_peak_12052  | 4.65598     | 6.20215       | 3.43047       | 100         | Promoter (<=1kb)   | 82176657  | 82179812  | Ccl1     |
| Treg_1_peak_12059  | 7.70293     | 11.9322       | 8.5491        | 173         | Promoter (1-2kb)   | 82176657  | 82305690  | Ccl1     |
| Treg_1_peak_12048  | 3.95813     | 5.07252       | 2.42876       | 120         | Distal Intergenic  | 82057823  | 82062955  | Ccl11    |
| Treg_1_peak_12049  | 3.1665      | 3.78996       | 1.3917        | 99          | Distal Intergenic  | 82057823  | 82062955  | Ccl11    |
| Treg_1_peak_12050  | 6.26404     | 9.03921       | 5.90404       | 126         | Distal Intergenic  | 82057823  | 82062955  | Ccl11    |
| Treg_1_peak_12046  | 4.6822      | 6.26545       | 3.49061       | 120         | Intron (ENSMUST000 | 82035571  | 82037453  | Ccl2     |
| Treg_1_peak_2292   | 3.95813     | 5.07252       | 2.42876       | 158         | Distal Intergenic  | 83116793  | 83119167  | Ccl20    |
| Treg_1_peak_2293   | 5.39205     | 7.49389       | 4.54135       | 174         | Distal Intergenic  | 83116793  | 83119167  | Ccl20    |
| Treg_1_peak_65213a | 5.45622     | 7.49968       | 4.54589       | 132         | Distal Intergenic  | 94745590  | 94751699  | Ccl22    |
| Treg_1_peak_65213b | 5.58271     | 7.68039       | 4.71114       | 492         | Distal Intergenic  | 94745590  | 94751699  | Ccl22    |
| Treg_1_peak_53662  | 4.38483     | 5.49927       | 2.81361       | 182         | Distal Intergenic  | 135570580 | 135573049 | Ccl24    |
| Treg_1_peak_53661  | 4.91827     | 6.6116        | 3.75113       | 119         | Promoter (<=1kb)   | 135570580 | 135573049 | Ccl24    |
| Treg_1_peak_62625  | 6.93264     | 10.4055       | 7.14268       | 204         | Promoter (1-2kb)   | 4332259   | 4334807   | Ccl25    |
| Treg_1_peak_20110  | 5.5248      | 7.81796       | 4.82256       | 121         | Promoter (1-2kb)   | 119623819 | 119654359 | Ccl28    |
| Treg_1_peak_20111  | 4.40907     | 5.64739       | 2.94543       | 146         | Promoter (2-3kb)   | 119623819 | 119654359 | Ccl28    |
| Treg_1_peak_12086  | 4.38483     | 5.49927       | 2.81361       | 188         | Distal Intergenic  | 83525778  | 83530518  | Ccl5     |
| Treg_1_peak_12091  | 9.24352     | 15.1056       | 11.5129       | 161         | Intron (ENSMUST000 | 83587882  | 83593087  | Ccl6     |
| Treg_1_peak_12090  | 5.54138     | 7.86          | 4.82256       | 125         | Promoter (<=1kb)   | 83588395  | 83589875  | Ccl6     |
| Treg_1_peak_12047  | 4.75029     | 6.34321       | 3.56123       | 203         | Distal Intergenic  | 82045712  | 82047525  | Ccl7     |
| Treg_1_peak_12051  | 4.62176     | 6.12093       | 3.35997       | 141         | Promoter (<=1kb)   | 82115185  | 82116799  | Ccl8     |
| Treg_1_peak_12087  | 5.07187     | 6.73627       | 3.85677       | 183         | Distal Intergenic  | 83575318  | 83577142  | Ccl9     |
| Treg_1_peak_12088  | 6.97382     | 10.4549       | 7.18992       | 150         | Distal Intergenic  | 83575318  | 83577142  | Ccl9     |
| Treg_1_peak_70077  | 6.93264     | 10.4055       | 7.14268       | 114         | Distal Intergenic  | 123977243 | 123978408 | Ccr11    |
| Treg_1_peak_70078  | 15.6601     | 31.0509       | 26.8041       | 199         | Distal Intergenic  | 123977243 | 123978408 | Ccr11    |
| Treg_1_peak_70079  | 3.95813     | 5.07252       | 2.42876       | 183         | Distal Intergenic  | 124101950 | 124113557 | Ccr2     |
| Treg_1_peak_70080  | 3.95813     | 5.07252       | 2.42876       | 141         | Distal Intergenic  | 124101950 | 124113557 | Ccr2     |
| Treg_1_peak_69689  | 5.78315     | 8.45152       | 5.38751       | 134         | Distal Intergenic  | 114491779 | 114496038 | Ccr4     |
| Treg_1_peak_69690  | 5.81222     | 8.12127       | 5.0776        | 151         | Promoter (<=1kb)   | 114490316 | 114496562 | Ccr4     |
| Treg_1_peak_29260  | 4.62176     | 6.12093       | 3.35997       | 167         | Promoter (<=1kb)   | 8236043   | 8256108   | Ccr6     |
| Treg_1_peak_12554  | 3.48778     | 4.38374       | 1.95309       | 104         | Distal Intergenic  | 99144196  | 99155077  | Ccr7     |
| Treg_1_peak_69926  | 4.52563     | 5.9889        | 3.27461       | 215         | Distal Intergenic  | 120092114 | 120094906 | Ccr8     |
| Treg_1_peak_70074  | 3.95813     | 5.07252       | 2.42876       | 235         | Intron (ENSMUST000 | 123774540 | 123783457 | Ccr9     |
| Treg_1_peak_70073  | 5.80591     | 8.48822       | 5.41921       | 145         | Promoter (<=1kb)   | 123774540 | 123783457 | Ccr9     |
| Treg_1_peak_68636  | 4.62176     | 6.12093       | 3.35997       | 76          | Distal Intergenic  | 78615546  | 78716253  | Cd109    |
| Treg_1_peak_68637  | 6.16235     | 8.9243        | 5.81442       | 192         | Distal Intergenic  | 78615546  | 78716253  | Cd109    |
| Treg_1_peak_68638  | 5.5248      | 7.81796       | 4.82256       | 164         | Distal Intergenic  | 78615546  | 78716253  | Cd109    |
| Treg_1_peak_32774  | 5.31504     | 7.17252       | 4.27037       | 112         | Distal Intergenic  | 36725871  | 36726738  | Cd14     |
| Treg_1_peak_62482  | 5.02534     | 14.3214       | 10.771        | 138         | Promoter (2-3kb)   | 140218541 | 140230982 | Cd1631   |
| Treg_1_peak_59078  | 4.40907     | 5.64739       | 2.94543       | 125         | Distal Intergenic  | 24743983  | 24760311  | Cd177    |
| Treg_1_peak_59076  | 8.136       | 14.7988       | 11.2302       | 187         | Downstream (1-2kb) | 24745127  | 24750821  | Cd177    |
| Treg_1_peak_59077  | 4.17919     | 5.66768       | 2.96525       | 211         | Promoter (1-2kb)   | 24745127  | 24750821  | Cd177    |
| Treg_1_peak_19630  | 10.0344     | 17.9375       | 14.1933       | 149         | Distal Intergenic  | 102693558 | 102706955 | Cd180    |
| Treg_1_peak_19631  | 9.24352     | 15.1056       | 11.5129       | 153         | Intron (ENSMUST000 | 102693611 | 102739504 | Cd180    |
| Treg_1_peak_62059  | 4.22248     | 5.33598       | 2.6712        | 149         | Promoter (1-2kb)   | 126408451 | 126414889 | Cd19     |
| Treg_1_peak_43525  | 4.74975     | 6.43314       | 3.57669       | 126         | Distal Intergenic  | 86986551  | 86989780  | Cd1d2    |
| Treg_1_peak_43526  | 7.70293     | 11.9322       | 8.5491        | 159         | Distal Intergenic  | 86986551  | 86989780  | Cd1d2    |
| Treg_1_peak_43527  | 4.74975     | 6.43314       | 3.57669       | 171         | Distal Intergenic  | 86986551  | 86989780  | Cd1d2    |
| Treg_1_peak_27595  | 5.94666     | 15.505        | 11.9005       | 200         | Distal Intergenic  | 45392245  | 45400312  | Cd200    |
| Treg_1_peak_27596  | 6.89044     | 10.3071       | 7.07804       | 130         | Downstream (1-2kb) | 45392245  | 45400312  | Cd200    |
| Treg_1_peak_27597  | 8.76966     | 14.3242       | 10.771        | 188         | Intron (ENSMUST000 | 45392245  | 45400312  | Cd200    |
| Treg_1_peak_27598  | 7.70293     | 11.9322       | 8.5491        | 369         | Promoter (2-3kb)   | 45392245  | 45400312  | Cd200    |
| Treg_1_peak_27592  | 4.62176     | 6.12093       | 3.35997       | 216         | Distal Intergenic  | 44943678  | 44964682  | Cd200r3  |
| Treg_1_peak_27593  | 5.2781      | 7.39534       | 4.48065       | 208         | Distal Intergenic  | 44965254  | 44966854  | Cd200r3  |
| Treg_1_peak_62606  | 7.12463     | 10.8796       | 7.56521       | 129         | Downstream (1-2kb) | 3743801   | 3748927   | Cd209a   |
| Treg_1_peak_62613  | 3.08117     | 3.58522       | 1.34861       | 81          | Distal Intergenic  | 3918677   | 3926813   | Cd209b   |
| Treg_1_peak_62614  | 3.08117     | 3.58522       | 1.34861       | 226         | Distal Intergenic  | 3918677   | 3926813   | Cd209b   |
| Treg_1_peak_62615  | 6.333       | 9.34439       | 6.16031       | 137         | Distal Intergenic  | 3917655   | 3926844   | Cd209b   |
| Treg_1_peak_62610  | 8.70788     | 14.0823       | 10.5478       | 162         | Distal Intergenic  | 3871824   | 3878555   | Cd209d   |
| Treg_1_peak_62611  | 4.74975     | 6.43314       | 3.57669       | 214         | Distal Intergenic  | 3871824   | 3878555   | Cd209d   |
| Treg_1_peak_62612  | 5.54138     | 7.86          | 4.82256       | 179         | Distal Intergenic  | 3871824   | 3878555   | Cd209d   |
| Treg_1_peak_62608  | 4.62176     | 6.12093       | 3.35997       | 119         | Distal Intergenic  | 3847965   | 3854309   | Cd209e   |
| Treg_1_peak_62609  | 7.91625     | 12.4603       | 9.03111       | 167         | Distal Intergenic  | 3847965   | 3854309   | Cd209e   |
| Treg_1_peak_62607  | 5.54138     | 7.86          | 4.82256       | 110         | Intron (ENSMUST000 | 3847965   | 3854309   | Cd209e   |
| Treg_1_peak_62621  | 6.06246     | 8.68979       | 5.61559       | 134         | Distal Intergenic  | 4134652   | 4137707   | Cd209g   |
| Treg_1_peak_34310  | 3.95813     | 5.07252       | 2.42876       | 219         | Intron (ENSMUST000 | 89206101  | 89207338  | Cd226    |
| Treg_1_peak_5099   | 7.51685     | 11.6125       | 8.26253       | 159         | Intron (ENSMUST000 | 171579063 | 171585318 | Cd244a   |
| Treg_1_peak_4894   | 8.37406     | 13.2159       | 9.74736       | 127         | Intron (ENSMUST000 | 165788765 | 165870249 | Cd247    |
| Treg_1_peak_4893   | 5.01123     | 6.63059       | 3.75453       | 114         | Promoter (<=1kb)   | 165788681 | 165871153 | Cd247    |
| Treg_1_peak_7085   | 5.37988     | 7.55887       | 4.60357       | 387         | Distal Intergenic  | 43578284  | 43579197  | Cd24a    |
| Treg_1_peak_7086   | 4.62176     | 6.12093       | 3.35997       | 260         | Distal Intergenic  | 43578284  | 43579197  | Cd24a    |
| Treg_1_peak_68006  | 6.20798     | 9.03363       | 5.90404       | 192         | Distal Intergenic  | 58535576  | 58537471  | Cd276    |
| Treg_1_peak_30215  | 7.12463     | 10.8796       | 7.56521       | 150         | Distal Intergenic  | 42792952  | 42799888  | Cd2ap    |
| Treg_1_peak_30218  | 13.8653     | 25.3877       | 21.3241       | 171         | Distal Intergenic  | 42816264  | 42876665  | Cd2ap    |
| Treg_1_peak_30219  | 6.61086     | 9.82156       | 6.61457       | 119         | Distal Intergenic  | 42816264  | 42876665  | Cd2ap    |
| Treg_1_peak_30220  | 7.70293     | 11.9322       | 8.5491        | 157         | Distal Intergenic  | 42816264  | 42876665  | Cd2ap    |
| Treg_1_peak_30216  | 11.5544     | 20.1201       | 16.2607       | 181         | Intron (ENSMUST000 | 42825421  | 42831030  | Cd2ap    |
| Treg_1_peak_30217  | 4.62176     | 6.12093       | 3.35997       | 113         | Intron (ENSMUST000 | 42792951  | 42876389  | Cd2ap    |
| Treg_1_peak_13085  | 7.8745      | 12.1733       | 8.77774       | 154         | Distal Intergenic  | 114890041 | 114904654 | Cd300a   |
| Treg_1_peak_13086  | 9.24352     | 15.1056       | 11.5129       | 146         | Distal Intergenic  | 114890041 | 114904654 | Cd300a   |

|                   |         |         |         |     |                    |           |           |         |
|-------------------|---------|---------|---------|-----|--------------------|-----------|-----------|---------|
| Treg_1_peak_13089 | 4.62176 | 6.12093 | 3.35997 | 124 | Downstream (<1kb)  | 114982274 | 114989922 | Cd300ld |
| Treg_1_peak_13088 | 4.40907 | 5.64739 | 2.94543 | 139 | Downstream (1-2kb) | 114982274 | 114989922 | Cd300ld |
| Treg_1_peak_13090 | 6.26404 | 9.03921 | 5.90404 | 414 | Promoter (<=1kb)   | 114982274 | 114989922 | Cd300ld |
| Treg_1_peak_13097 | 3.75842 | 4.42484 | 1.96438 | 117 | Intron (ENSMUST000 | 115120357 | 115126791 | Cd300lf |
| Treg_1_peak_13098 | 5.40173 | 7.51681 | 4.56243 | 192 | Intron (ENSMUST000 | 115120357 | 115126791 | Cd300lf |
| Treg_1_peak_13099 | 5.63764 | 7.8123  | 4.82256 | 154 | Intron (ENSMUST000 | 115120357 | 115126791 | Cd300lf |
| Treg_1_peak_13096 | 3.85147 | 4.81413 | 2.28385 | 94  | Intron (ENSMUST000 | 115120357 | 115126791 | Cd300lf |
| Treg_1_peak_13102 | 8.68183 | 14.0155 | 10.5057 | 165 | Promoter (<=1kb)   | 115118848 | 115133991 | Cd300lf |
| Treg_1_peak_13103 | 11.64   | 20.3281 | 16.4631 | 139 | Promoter (<=1kb)   | 115116214 | 115133992 | Cd300lf |
| Treg_1_peak_13101 | 4.65066 | 5.96969 | 3.25562 | 117 | Promoter (2-3kb)   | 115120261 | 115126850 | Cd300lf |
| Treg_1_peak_13100 | 13.9621 | 25.6451 | 21.5714 | 204 | Promoter (2-3kb)   | 115120357 | 115126791 | Cd300lf |
| Treg_1_peak_37478 | 3.95813 | 5.07252 | 2.42876 | 229 | Intron (ENSMUST000 | 60251993  | 60284488  | Cd302   |
| Treg_1_peak_59606 | 8.14325 | 12.9523 | 9.94681 | 195 | Promoter (<=1kb)   | 43528526  | 43532678  | Cd33    |
| Treg_1_peak_59607 | 3.75842 | 4.42484 | 1.96438 | 151 | Promoter (<=1kb)   | 43524216  | 43533171  | Cd33    |
| Treg_1_peak_5865  | 5.54138 | 7.86    | 4.82256 | 124 | Distal Intergenic  | 194938819 | 194961279 | Cd34    |
| Treg_1_peak_50170 | 5.39205 | 7.49389 | 4.54135 | 115 | Distal Intergenic  | 17814675  | 17888801  | Cd36    |
| Treg_1_peak_50169 | 4.74975 | 6.43314 | 3.57669 | 129 | Intron (ENSMUST000 | 17781690  | 17849792  | Cd36    |
| Treg_1_peak_50168 | 5.54138 | 7.86    | 4.82256 | 150 | Intron (ENSMUST000 | 17782016  | 17835696  | Cd36    |
| Treg_1_peak_50875 | 8.14325 | 12.9523 | 9.94681 | 137 | Promoter (2-3kb)   | 43868553  | 43912375  | Cd38    |
| Treg_1_peak_67545 | 4.74975 | 6.43314 | 3.57669 | 116 | Promoter (<=1kb)   | 44981786  | 44987339  | Cd3d    |
| Treg_1_peak_57756 | 6.61916 | 41.3825 | 36.8683 | 223 | Promoter (2-3kb)   | 124867333 | 124888199 | Cd4     |
| Treg_1_peak_40489 | 5.86393 | 8.86216 | 5.78445 | 191 | Intron (ENSMUST000 | 165062676 | 165066695 | Cd40    |
| Treg_1_peak_40487 | 7.50479 | 11.5911 | 8.25233 | 144 | Promoter (1-2kb)   | 165062676 | 165066695 | Cd40    |
| Treg_1_peak_40488 | 4.12763 | 5.1875  | 2.54049 | 117 | Promoter (2-3kb)   | 165062676 | 165066695 | Cd40    |
| Treg_1_peak_38656 | 7.34339 | 11.1301 | 7.8015  | 119 | Distal Intergenic  | 102811141 | 102901665 | Cd44    |
| Treg_1_peak_38657 | 8.81814 | 14.1372 | 10.596  | 139 | Distal Intergenic  | 102811141 | 102901665 | Cd44    |
| Treg_1_peak_38658 | 6.16235 | 8.9243  | 5.81442 | 141 | Distal Intergenic  | 102811141 | 102901665 | Cd44    |
| Treg_1_peak_38659 | 3.85147 | 4.81413 | 2.28385 | 90  | Distal Intergenic  | 102811141 | 102901665 | Cd44    |
| Treg_1_peak_38655 | 7.22591 | 13.2958 | 9.8262  | 250 | Promoter (1-2kb)   | 102811141 | 102901665 | Cd44    |
| Treg_1_peak_5867  | 4.31749 | 5.45752 | 2.78881 | 119 | Intron (ENSMUST000 | 195041835 | 195069114 | Cd46    |
| Treg_1_peak_5868  | 5.54138 | 7.86    | 4.82256 | 150 | Intron (ENSMUST000 | 195041835 | 195069114 | Cd46    |
| Treg_1_peak_5870  | 4.74975 | 6.43314 | 3.57669 | 184 | Promoter (<=1kb)   | 195041835 | 195069114 | Cd46    |
| Treg_1_peak_5869  | 4.74975 | 6.43314 | 3.57669 | 130 | Promoter (2-3kb)   | 195041835 | 195069114 | Cd46    |
| Treg_1_peak_27717 | 10.6489 | 18.6112 | 14.8258 | 213 | Distal Intergenic  | 49866833  | 49911091  | Cd47    |
| Treg_1_peak_27718 | 5.54138 | 7.86    | 4.82256 | 126 | Distal Intergenic  | 49866833  | 49911091  | Cd47    |
| Treg_1_peak_27716 | 11.9017 | 21.5956 | 17.6791 | 150 | Intron (ENSMUST000 | 49866833  | 49911091  | Cd47    |
| Treg_1_peak_27715 | 5.39205 | 7.49389 | 4.54135 | 149 | Intron (ENSMUST000 | 49800533  | 49911046  | Cd47    |
| Treg_1_peak_44059 | 3.95813 | 5.07252 | 2.42876 | 93  | Distal Intergenic  | 106759921 | 106790149 | Cd53    |
| Treg_1_peak_3941  | 6.33372 | 9.6184  | 6.42472 | 117 | Distal Intergenic  | 130419601 | 130422740 | Cd55b   |
| Treg_1_peak_3942  | 5.63764 | 7.8123  | 4.82256 | 111 | Distal Intergenic  | 130419601 | 130422740 | Cd55b   |
| Treg_1_peak_3943  | 3.85147 | 4.81413 | 2.28385 | 87  | Distal Intergenic  | 130419601 | 130422740 | Cd55b   |
| Treg_1_peak_3944  | 3.85147 | 4.81413 | 2.28385 | 106 | Intron (ENSMUST000 | 130419601 | 130422740 | Cd55b   |
| Treg_1_peak_3945  | 6.98398 | 10.5289 | 7.25751 | 142 | Intron (ENSMUST000 | 130419601 | 130422740 | Cd55b   |
| Treg_1_peak_43540 | 4.18703 | 5.19897 | 2.54561 | 172 | Intron (ENSMUST000 | 87357881  | 87371073  | Cd5l    |
| Treg_1_peak_34494 | 5.14392 | 6.93808 | 4.0439  | 164 | Promoter (<=1kb)   | 10789341  | 10830058  | Cd6     |
| Treg_1_peak_11669 | 9.73065 | 17.8784 | 14.135  | 180 | Promoter (<=1kb)   | 69664306  | 69666062  | Cd68    |
| Treg_1_peak_57891 | 6.2783  | 9.20629 | 6.06554 | 159 | Distal Intergenic  | 129267325 | 129275436 | Cd69    |
| Treg_1_peak_30604 | 3.1665  | 3.78996 | 1.3917  | 106 | Distal Intergenic  | 57145997  | 57149777  | Cd70    |
| Treg_1_peak_33422 | 3.75842 | 4.42484 | 1.96438 | 399 | Promoter (2-3kb)   | 60803848  | 60809253  | Cd74    |
| Treg_1_peak_12751 | 5.09926 | 6.90493 | 4.02125 | 231 | Downstream (<1kb)  | 106311344 | 106314529 | Cd79b   |
| Treg_1_peak_12750 | 3.19222 | 3.61568 | 1.37597 | 96  | Downstream (1-2kb) | 106311344 | 106314529 | Cd79b   |
| Treg_1_peak_27440 | 5.54138 | 7.86    | 4.82256 | 136 | Intron (ENSMUST000 | 38459118  | 38486447  | Cd80    |
| Treg_1_peak_62534 | 10.864  | 18.6118 | 14.8258 | 186 | Intron (ENSMUST000 | 143052739 | 143067934 | Cd81    |
| Treg_1_peak_62533 | 6.26404 | 9.03921 | 5.90404 | 129 | Intron (ENSMUST000 | 143052739 | 143067934 | Cd81    |
| Treg_1_peak_17776 | 3.08117 | 3.58522 | 1.34861 | 259 | Distal Intergenic  | 43784775  | 43803132  | Cd83    |
| Treg_1_peak_5110  | 6.24294 | 9.11882 | 5.9812  | 150 | Distal Intergenic  | 171839697 | 171890718 | Cd84    |
| Treg_1_peak_5112  | 5.39205 | 7.49389 | 4.54135 | 124 | Intron (ENSMUST000 | 171840633 | 171886430 | Cd84    |
| Treg_1_peak_27386 | 14.6969 | 27.3892 | 23.262  | 205 | Intron (ENSMUST000 | 36603869  | 36666077  | Cd86    |
| Treg_1_peak_27384 | 5.01123 | 6.63059 | 3.75453 | 127 | Intron (ENSMUST000 | 36620713  | 36642805  | Cd86    |
| Treg_1_peak_27387 | 7.12463 | 10.8796 | 7.56521 | 166 | Promoter (1-2kb)   | 36603869  | 36666077  | Cd86    |
| Treg_1_peak_27385 | 3.0527  | 3.52025 | 1.34861 | 71  | Promoter (2-3kb)   | 36620713  | 36642805  | Cd86    |
| Treg_1_peak_56106 | 6.26404 | 9.03921 | 5.90404 | 136 | Exon (ENSMUST000   | 71322788  | 71337494  | Cd8b1   |
| Treg_1_peak_57767 | 6.2783  | 9.20629 | 6.06554 | 173 | Distal Intergenic  | 125462116 | 125463024 | Cd9     |
| Treg_1_peak_57768 | 5.87876 | 8.28611 | 5.22734 | 124 | Distal Intergenic  | 125462116 | 125463024 | Cd9     |
| Treg_1_peak_57769 | 4.57905 | 6.02171 | 3.30528 | 104 | Distal Intergenic  | 125462116 | 125463024 | Cd9     |
| Treg_1_peak_57770 | 5.45622 | 7.49968 | 4.54589 | 153 | Intron (ENSMUST000 | 125460589 | 125478302 | Cd9     |
| Treg_1_peak_40011 | 6.77133 | 10.3366 | 7.10727 | 146 | Distal Intergenic  | 148436640 | 148443563 | Cd93    |
| Treg_1_peak_35090 | 4.74975 | 6.43314 | 3.57669 | 128 | Distal Intergenic  | 34300075  | 34316677  | Fas     |
| Treg_1_peak_35089 | 6.333   | 9.34439 | 6.16031 | 163 | Intron (ENSMUST000 | 34300075  | 34316677  | Fas     |
| Treg_1_peak_4756  | 4.62176 | 6.12093 | 3.35997 | 138 | Promoter (2-3kb)   | 161780689 | 161788495 | Fasl    |
| Treg_1_peak_3968  | 3.95813 | 5.07252 | 2.42876 | 125 | Distal Intergenic  | 131019845 | 131024974 | Il10    |
| Treg_1_peak_67550 | 3.95813 | 5.07252 | 2.42876 | 123 | Distal Intergenic  | 45253840  | 45269149  | Il10ra  |
| Treg_1_peak_46743 | 7.62573 | 12.7279 | 9.28642 | 128 | Intron (ENSMUST000 | 41699989  | 41769474  | Il11ra1 |
| Treg_1_peak_43044 | 5.39205 | 7.49389 | 4.54135 | 140 | Distal Intergenic  | 68690644  | 68698547  | Il12a   |
| Treg_1_peak_43045 | 5.14392 | 6.93808 | 4.0439  | 124 | Distal Intergenic  | 68690644  | 68698547  | Il12a   |
| Treg_1_peak_43047 | 6.66871 | 9.92084 | 6.71096 | 279 | Distal Intergenic  | 68694021  | 68698547  | Il12a   |
| Treg_1_peak_43048 | 4.62176 | 6.12093 | 3.35997 | 128 | Distal Intergenic  | 68694021  | 68698547  | Il12a   |
| Treg_1_peak_43046 | 9.81319 | 16.275  | 12.6162 | 154 | Promoter (2-3kb)   | 68690644  | 68698547  | Il12a   |
| Treg_1_peak_56008 | 6.333   | 9.34439 | 6.16031 | 211 | Intron (ENSMUST000 | 67292018  | 67376188  | Il12rb2 |
| Treg_1_peak_56009 | 9.50058 | 17.0445 | 13.35   | 152 | Intron (ENSMUST000 | 67292018  | 67376188  | Il12rb2 |
| Treg_1_peak_56005 | 5.54138 | 7.86    | 4.82256 | 143 | Intron (ENSMUST000 | 67291318  | 67339694  | Il12rb2 |
| Treg_1_peak_56006 | 4.38483 | 5.49927 | 2.81361 | 231 | Intron (ENSMUST000 | 67291318  | 67339694  | Il12rb2 |
| Treg_1_peak_56007 | 5.54138 | 7.86    | 4.82256 | 128 | Promoter (2-3kb)   | 67291318  | 67339694  | Il12rb2 |
| Treg_1_peak_11123 | 5.88864 | 11.0129 | 7.69541 | 156 | Downstream (1-2kb) | 53631324  | 53634702  | Il13    |
| Treg_1_peak_70429 | 5.39205 | 7.49389 | 4.54135 | 191 | Intron (ENSMUST000 | 36112110  | 36171259  | Il13ra1 |
| Treg_1_peak_71230 | 4.74975 | 6.43314 | 3.57669 | 114 | Distal Intergenic  | 147383478 | 147403832 | Il13ra2 |
| Treg_1_peak_71231 | 8.70788 | 14.0823 | 10.5478 | 156 | Distal Intergenic  | 147383478 | 147403832 | Il13ra2 |
| Treg_1_peak_64852 | 11.0828 | 19.1625 | 15.347  | 167 | Distal Intergenic  | 82331914  | 82344473  | Il15    |

|                   |         |         |         |     |                    |           |           |         |
|-------------------|---------|---------|---------|-----|--------------------|-----------|-----------|---------|
| Treg_1_peak_64853 | 5.01123 | 6.63059 | 3.75453 | 152 | Promoter (<=1kb)   | 82345662  | 82398627  | II15    |
| Treg_1_peak_36218 | 7.75997 | 12.0697 | 8.67583 | 143 | Distal Intergenic  | 11705290  | 11734317  | II15ra  |
| Treg_1_peak_36219 | 11.084  | 21.0945 | 17.1941 | 235 | Promoter (1-2kb)   | 11723164  | 11733968  | II15ra  |
| Treg_1_peak_60754 | 4.73554 | 6.39728 | 3.57669 | 135 | Promoter (1-2kb)   | 83722510  | 83739937  | II16    |
| Treg_1_peak_497   | 3.1665  | 3.78996 | 1.3917  | 160 | Distal Intergenic  | 20730905  | 20734496  | II17a   |
| Treg_1_peak_498   | 12.6674 | 25.3261 | 21.2737 | 177 | Distal Intergenic  | 20730905  | 20734496  | II17a   |
| Treg_1_peak_499   | 5.54138 | 7.86    | 4.82256 | 150 | Promoter (1-2kb)   | 20777679  | 20779554  | II17f   |
| Treg_1_peak_57601 | 7.70293 | 11.9322 | 8.5491  | 188 | Distal Intergenic  | 120463247 | 120483729 | II17ra  |
| Treg_1_peak_20744 | 4.74975 | 6.43314 | 3.57669 | 111 | Distal Intergenic  | 27038941  | 27107286  | II17rd  |
| Treg_1_peak_20745 | 6.93264 | 10.4055 | 7.14268 | 157 | Intron (ENSMUST000 | 27039256  | 27102509  | II17rd  |
| Treg_1_peak_20746 | 4.74975 | 6.43314 | 3.57669 | 114 | Intron (ENSMUST000 | 27039256  | 27102509  | II17rd  |
| Treg_1_peak_20747 | 7.12463 | 10.8796 | 7.56521 | 144 | Intron (ENSMUST000 | 27067397  | 27100976  | II17rd  |
| Treg_1_peak_20748 | 6.61361 | 9.68484 | 6.48229 | 154 | Intron (ENSMUST000 | 27087765  | 27101491  | II17rd  |
| Treg_1_peak_57386 | 4.75029 | 6.34321 | 3.56123 | 115 | Distal Intergenic  | 113458484 | 113470758 | II17re  |
| Treg_1_peak_57387 | 4.47476 | 6.91967 | 4.03572 | 124 | Promoter (<=1kb)   | 113466360 | 113469987 | II17re  |
| Treg_1_peak_67764 | 10.0225 | 17.1554 | 13.4511 | 152 | Distal Intergenic  | 50575273  | 50581837  | II18    |
| Treg_1_peak_3964  | 5.39205 | 7.49389 | 4.54135 | 123 | Distal Intergenic  | 130932816 | 130940115 | II19    |
| Treg_1_peak_3965  | 8.14325 | 12.9523 | 9.49681 | 168 | Distal Intergenic  | 130932816 | 130940115 | II19    |
| Treg_1_peak_3966  | 4.62176 | 6.12093 | 3.35997 | 231 | Distal Intergenic  | 130932816 | 130940115 | II19    |
| Treg_1_peak_3967  | 6.94508 | 10.4352 | 7.1716  | 280 | Distal Intergenic  | 130932816 | 130940115 | II19    |
| Treg_1_peak_36582 | 5.80591 | 8.48822 | 5.41921 | 139 | Distal Intergenic  | 24291196  | 24293820  | II1f10  |
| Treg_1_peak_36581 | 4.62176 | 6.12093 | 3.35997 | 118 | Distal Intergenic  | 24276954  | 24282432  | II1f5   |
| Treg_1_peak_36580 | 4.62176 | 6.12093 | 3.35997 | 134 | Promoter (2-3kb)   | 24215505  | 24225525  | II1f6   |
| Treg_1_peak_36578 | 4.74975 | 6.43314 | 3.57669 | 123 | Distal Intergenic  | 24153161  | 24160519  | II1f8   |
| Treg_1_peak_36579 | 4.74975 | 6.43314 | 3.57669 | 140 | Promoter (<=1kb)   | 24153161  | 24160519  | II1f8   |
| Treg_1_peak_1093  | 5.54138 | 7.86    | 4.82256 | 177 | Distal Intergenic  | 40225080  | 40317257  | II1r1   |
| Treg_1_peak_1094  | 4.41584 | 6.28336 | 3.50757 | 139 | Distal Intergenic  | 40225080  | 40317257  | II1r1   |
| Treg_1_peak_1095  | 7.12463 | 10.8796 | 7.56521 | 166 | Distal Intergenic  | 40225080  | 40317257  | II1r1   |
| Treg_1_peak_1096  | 3.1665  | 3.78996 | 1.3917  | 115 | Distal Intergenic  | 40225080  | 40317257  | II1r1   |
| Treg_1_peak_1097  | 5.39205 | 7.49389 | 4.54135 | 237 | Intron (ENSMUST000 | 40225080  | 40317257  | II1r1   |
| Treg_1_peak_1099  | 6.16235 | 8.9243  | 5.81442 | 146 | Intron (ENSMUST000 | 40266657  | 40277178  | II1r1   |
| Treg_1_peak_1102  | 7.84787 | 12.2867 | 8.88865 | 168 | Intron (ENSMUST000 | 40266657  | 40277178  | II1r1   |
| Treg_1_peak_1100  | 4.75029 | 6.34321 | 3.56123 | 157 | Intron (ENSMUST000 | 40266657  | 40277178  | II1r1   |
| Treg_1_peak_1101  | 5.5248  | 7.81796 | 4.82256 | 95  | Intron (ENSMUST000 | 40266657  | 40277178  | II1r1   |
| Treg_1_peak_1087a | 5.65411 | 7.8411  | 4.82256 | 120 | Distal Intergenic  | 40074079  | 40112136  | II1r2   |
| Treg_1_peak_1087b | 5.36237 | 7.34092 | 4.43196 | 520 | Distal Intergenic  | 40074079  | 40112136  | II1r2   |
| Treg_1_peak_1088  | 3.85147 | 4.81413 | 2.28385 | 65  | Promoter (2-3kb)   | 40084698  | 40125231  | II1r2   |
| Treg_1_peak_27079 | 5.91033 | 10.6722 | 7.39786 | 143 | Distal Intergenic  | 26581704  | 26725264  | II1rap  |
| Treg_1_peak_27080 | 5.84775 | 8.22008 | 5.17329 | 134 | Distal Intergenic  | 26581704  | 26725264  | II1rap  |
| Treg_1_peak_27081 | 4.62176 | 6.12093 | 3.35997 | 148 | Distal Intergenic  | 26581704  | 26725264  | II1rap  |
| Treg_1_peak_27082 | 5.14392 | 6.93808 | 4.0439  | 109 | Intron (ENSMUST000 | 26727042  | 26728228  | II1rap  |
| Treg_1_peak_70793 | 7.51685 | 11.6125 | 8.26253 | 196 | Intron (ENSMUST000 | 86747242  | 87890235  | II1rap1 |
| Treg_1_peak_70794 | 11.8744 | 20.9188 | 17.0233 | 217 | Intron (ENSMUST000 | 86747242  | 87890235  | II1rap1 |
| Treg_1_peak_71153 | 4.62176 | 6.12093 | 3.35997 | 117 | Distal Intergenic  | 137570608 | 138846946 | II1rap2 |
| Treg_1_peak_71154 | 4.74975 | 6.43314 | 3.57669 | 119 | Intron (ENSMUST000 | 137571019 | 138506311 | II1rap2 |
| Treg_1_peak_1107  | 3.95813 | 5.07252 | 2.42876 | 126 | Intron (ENSMUST000 | 40440628  | 40465396  | II1r11  |
| Treg_1_peak_1103  | 3.19222 | 3.61568 | 1.37597 | 117 | Intron (ENSMUST000 | 40324610  | 40329441  | II1r2   |
| Treg_1_peak_42167 | 5.63764 | 7.8123  | 4.82256 | 158 | Distal Intergenic  | 37120523  | 37125959  | II2     |
| Treg_1_peak_42168 | 10.4542 | 17.6518 | 13.9137 | 131 | Distal Intergenic  | 37120523  | 37125959  | II2     |
| Treg_1_peak_42166 | 14.2493 | 26.3487 | 22.2482 | 309 | Promoter (<=1kb)   | 37120523  | 37125959  | II2     |
| Treg_1_peak_3963  | 5.49351 | 7.73962 | 4.76883 | 164 | Distal Intergenic  | 130906985 | 130911451 | II20    |
| Treg_1_peak_3962  | 5.70585 | 7.932   | 4.89178 | 113 | Promoter (1-2kb)   | 130906985 | 130911451 | II20    |
| Treg_1_peak_6391  | 9.39606 | 15.7258 | 12.0953 | 249 | Distal Intergenic  | 19712570  | 19760053  | II20ra  |
| Treg_1_peak_69235 | 6.333   | 9.34439 | 6.16031 | 147 | Intron (ENSMUST000 | 100465708 | 100486385 | II20rb  |
| Treg_1_peak_69236 | 7.91625 | 12.4603 | 9.03111 | 395 | Promoter (2-3kb)   | 100465708 | 100486385 | II20rb  |
| Treg_1_peak_9343  | 4.62176 | 6.12093 | 3.35997 | 108 | Distal Intergenic  | 118204942 | 118210047 | II22    |
| Treg_1_peak_9344  | 6.6438  | 9.72451 | 6.51922 | 125 | Distal Intergenic  | 118204942 | 118210047 | II22    |
| Treg_1_peak_49290 | 10.6446 | 26.5882 | 22.4837 | 227 | Distal Intergenic  | 135728172 | 135752140 | II22ra1 |
| Treg_1_peak_49291 | 11.1654 | 19.3137 | 15.4938 | 126 | Intron (ENSMUST000 | 135728172 | 135752140 | II22ra1 |
| Treg_1_peak_6387  | 10.5562 | 19.723  | 15.8944 | 220 | Distal Intergenic  | 19621998  | 19634681  | II22ra2 |
| Treg_1_peak_56012 | 6.89044 | 10.3071 | 7.07804 | 153 | Intron (ENSMUST000 | 67422932  | 67491855  | II23r   |
| Treg_1_peak_56013 | 9.24352 | 15.1056 | 11.5129 | 164 | Intron (ENSMUST000 | 67422932  | 67491855  | II23r   |
| Treg_1_peak_62061 | 5.54138 | 7.86    | 4.82256 | 145 | Distal Intergenic  | 126589010 | 126594941 | II27    |
| Treg_1_peak_36217 | 4.75029 | 6.34321 | 3.56123 | 129 | Promoter (2-3kb)   | 11642807  | 11693193  | II2ra   |
| Treg_1_peak_25544 | 6.38918 | 9.4461  | 6.25977 | 148 | Exon (ENSMUST000   | 78481324  | 78493756  | II2rb   |
| Treg_1_peak_11144 | 6.16235 | 8.9243  | 5.81442 | 316 | Distal Intergenic  | 54265303  | 54267277  | II3     |
| Treg_1_peak_11143 | 4.74975 | 6.43314 | 3.57669 | 163 | Promoter (<=1kb)   | 54265303  | 54267277  | II3     |
| Treg_1_peak_53228 | 5.39205 | 7.49389 | 4.54135 | 134 | Downstream (2-3kb) | 123480157 | 123482101 | II31    |
| Treg_1_peak_53230 | 7.82953 | 14.2949 | 10.7518 | 149 | Intron (ENSMUST000 | 123480401 | 123489489 | II31    |
| Treg_1_peak_19915 | 3.06961 | 3.55865 | 1.34861 | 283 | Intron (ENSMUST000 | 112525846 | 112532344 | II31ra  |
| Treg_1_peak_19914 | 11.4008 | 23.7739 | 19.7727 | 446 | Intron (ENSMUST000 | 112525846 | 112532344 | II31ra  |
| Treg_1_peak_34975 | 4.62176 | 6.12093 | 3.35997 | 210 | Distal Intergenic  | 29925114  | 29960718  | II33    |
| Treg_1_peak_11122 | 11.5623 | 25.8014 | 21.7264 | 234 | Distal Intergenic  | 53612460  | 53618669  | II4     |
| Treg_1_peak_11120 | 6.26404 | 9.03921 | 5.90404 | 133 | Intron (ENSMUST000 | 53602982  | 53617224  | II4     |
| Treg_1_peak_11121 | 6.89044 | 10.3071 | 7.07804 | 161 | Promoter (<=1kb)   | 53602982  | 53617224  | II4     |
| Treg_1_peak_57224 | 3.75842 | 4.42484 | 1.96438 | 252 | Promoter (<=1kb)   | 106710357 | 106749037 | II5ra   |
| Treg_1_peak_50523 | 4.74975 | 6.43314 | 3.57669 | 107 | Distal Intergenic  | 30013321  | 30019839  | II6     |
| Treg_1_peak_41238 | 8.47322 | 13.5001 | 10.0067 | 230 | Distal Intergenic  | 7573182   | 7613760   | II7     |
| Treg_1_peak_41239 | 4.74975 | 6.43314 | 3.57669 | 110 | Distal Intergenic  | 7573182   | 7613760   | II7     |
| Treg_1_peak_41235 | 3.1665  | 3.78996 | 1.3917  | 104 | Intron (ENSMUST000 | 7573182   | 7613760   | II7     |
| Treg_1_peak_41236 | 5.39205 | 7.49389 | 4.54135 | 180 | Intron (ENSMUST000 | 7573182   | 7613760   | II7     |
| Treg_1_peak_41237 | 4.65598 | 6.20215 | 3.43047 | 147 | Intron (ENSMUST000 | 7573182   | 7613760   | II7     |
| Treg_1_peak_41234 | 3.85147 | 4.81413 | 2.28385 | 117 | Intron (ENSMUST000 | 7572028   | 7605864   | II7     |
| Treg_1_peak_23685 | 5.01123 | 6.63059 | 3.75453 | 191 | Intron (ENSMUST000 | 9516409   | 9530176   | II7r    |
| Treg_1_peak_23684 | 6.16235 | 8.9243  | 5.81442 | 124 | Intron (ENSMUST000 | 9511898   | 9529766   | II7r    |
| Treg_1_peak_26640 | 4.56032 | 6.26269 | 3.48849 | 153 | Distal Intergenic  | 10782240  | 10785536  | Socs1   |
| Treg_1_peak_8671  | 6.16235 | 8.9243  | 5.81442 | 200 | Distal Intergenic  | 95387667  | 95392967  | Socs2   |
| Treg_1_peak_8674  | 5.24951 | 7.15236 | 4.25278 | 127 | Exon (ENSMUST000   | 95387667  | 95392967  | Socs2   |

|                   |         |         |         |     |                    |          |          |       |
|-------------------|---------|---------|---------|-----|--------------------|----------|----------|-------|
| Treg_1_peak_8673  | 10.0344 | 17.9375 | 14.1933 | 151 | Intron (ENSMUST000 | 95387667 | 95392967 | Socs2 |
| Treg_1_peak_8672  | 5.80591 | 8.48822 | 5.41921 | 142 | Promoter (<=1kb)   | 95387667 | 95392967 | Socs2 |
| Treg_1_peak_31551 | 7.75255 | 13.7376 | 10.2352 | 179 | Distal Intergenic  | 87107679 | 87137839 | Socs5 |
| Treg_1_peak_31552 | 6.33372 | 9.6184  | 6.42472 | 130 | Distal Intergenic  | 87107858 | 87122990 | Socs5 |
| Treg_1_peak_34304 | 10.088  | 16.9255 | 13.2351 | 136 | Intron (ENSMUST000 | 88665224 | 88758491 | Socs6 |
| Treg_1_peak_34303 | 4.74975 | 6.43314 | 3.57669 | 110 | Promoter (<=1kb)   | 88665224 | 88758491 | Socs6 |
| Treg_1_peak_34302 | 4.62176 | 6.12093 | 3.35997 | 115 | Promoter (1-2kb)   | 88665224 | 88758491 | Socs6 |
| Treg_1_peak_34308 | 3.95813 | 5.07252 | 2.42876 | 162 | Promoter (1-2kb)   | 88870765 | 88927481 | Socs6 |

Table S8: Narrow peaks ChIPseeker annotation of HDAC8 in Treg cells (2)

| name               | signalValue | '-log10pvalue | '-log10qvalue | peak_summit | annotation            | geneStart | geneEnd   | geneName |
|--------------------|-------------|---------------|---------------|-------------|-----------------------|-----------|-----------|----------|
| Treg_2_peak_24111  | 3.69374     | 5.73445       | 3.33556       | 99          | Distal Intergenic     | 82176657  | 82179812  | Ccl1     |
| Treg_2_peak_24112  | 4.61717     | 7.516         | 4.89772       | 137         | Distal Intergenic     | 82176657  | 82179812  | Ccl1     |
| Treg_2_peak_24113  | 3.6359      | 5.41249       | 3.16527       | 98          | Distal Intergenic     | 82176657  | 82179812  | Ccl1     |
| Treg_2_peak_24114  | 3.69374     | 5.73445       | 3.33556       | 97          | Distal Intergenic     | 82176657  | 82179812  | Ccl1     |
| Treg_2_peak_24123  | 4.54487     | 7.11231       | 4.62813       | 113         | Distal Intergenic     | 82176657  | 82305690  | Ccl1     |
| Treg_2_peak_24124  | 3.6666      | 5.57696       | 3.31807       | 199         | Distal Intergenic     | 82176657  | 82305690  | Ccl1     |
| Treg_2_peak_24125  | 4.61717     | 7.516         | 4.89772       | 115         | Distal Intergenic     | 82176657  | 82305690  | Ccl1     |
| Treg_2_peak_24126  | 6.41655     | 11.0261       | 8.13533       | 104         | Distal Intergenic     | 82176657  | 82305690  | Ccl1     |
| Treg_2_peak_24127  | 6.15184     | 8.89942       | 6.19613       | 130         | Distal Intergenic     | 82176657  | 82305690  | Ccl1     |
| Treg_2_peak_24120  | 5.48847     | 9.07546       | 6.36882       | 121         | Intron (ENSMUST00000) | 82176657  | 82305690  | Ccl1     |
| Treg_2_peak_24119  | 3.69374     | 5.73445       | 3.33556       | 122         | Intron (ENSMUST00000) | 82176657  | 82305690  | Ccl1     |
| Treg_2_peak_24118  | 3.69374     | 5.73445       | 3.33556       | 114         | Intron (ENSMUST00000) | 82176657  | 82305690  | Ccl1     |
| Treg_2_peak_24116  | 12.7256     | 24.9724       | 21.2937       | 157         | Intron (ENSMUST00000) | 82176659  | 82179812  | Ccl1     |
| Treg_2_peak_24117  | 4.59282     | 7.37271       | 4.8659        | 110         | Intron (ENSMUST00000) | 82176659  | 82179812  | Ccl1     |
| Treg_2_peak_24115  | 4.54487     | 7.11231       | 4.62813       | 314         | Intron (ENSMUST00000) | 82176659  | 82179812  | Ccl1     |
| Treg_2_peak_24121  | 4.39989     | 6.45451       | 4.03544       | 201         | Promoter (<=1kb)      | 82176657  | 82305690  | Ccl1     |
| Treg_2_peak_24122  | 8.9794      | 16.0485       | 12.7895       | 174         | Promoter (1-2kb)      | 82176657  | 82305690  | Ccl1     |
| Treg_2_peak_24102  | 4.61717     | 7.516         | 4.89772       | 209         | Distal Intergenic     | 82057823  | 82062955  | Ccl11    |
| Treg_2_peak_24103  | 5.5406      | 9.37639       | 6.57036       | 194         | Distal Intergenic     | 82057823  | 82062955  | Ccl11    |
| Treg_2_peak_24104  | 3.6359      | 5.41249       | 3.16527       | 102         | Distal Intergenic     | 82101845  | 82103400  | Ccl12    |
| Treg_2_peak_129840 | 7.49823     | 11.9232       | 8.93461       | 146         | Promoter (<=1kb)      | 94810453  | 94812036  | Ccl17    |
| Treg_2_peak_24099  | 4.48055     | 6.80003       | 4.37459       | 237         | Intron (ENSMUST00000) | 82035571  | 82037453  | Ccl2     |
| Treg_2_peak_24100  | 3.59176     | 5.19719       | 3.00172       | 121         | Intron (ENSMUST00000) | 82035571  | 82037453  | Ccl2     |
| Treg_2_peak_4995   | 3.69374     | 5.73445       | 3.33556       | 120         | Distal Intergenic     | 83116766  | 83119166  | Ccl20    |
| Treg_2_peak_4996   | 4.54487     | 7.11231       | 4.62813       | 205         | Distal Intergenic     | 83116766  | 83119166  | Ccl20    |
| Treg_2_peak_129835 | 6.15984     | 9.81068       | 6.96648       | 121         | Distal Intergenic     | 94745590  | 94751699  | Ccl22    |
| Treg_2_peak_129836 | 10.9996     | 19.4911       | 16.0704       | 143         | Distal Intergenic     | 94745590  | 94751699  | Ccl22    |
| Treg_2_peak_129837 | 7.49823     | 11.9232       | 8.93461       | 120         | Distal Intergenic     | 94745590  | 94751699  | Ccl22    |
| Treg_2_peak_106999 | 2.7703      | 4.04921       | 1.90871       | 242         | Distal Intergenic     | 135570580 | 135573049 | Ccl24    |
| Treg_2_peak_106998 | 4.39989     | 6.45451       | 4.03544       | 202         | Promoter (2-3kb)      | 135569937 | 135573049 | Ccl24    |
| Treg_2_peak_124388 | 7.27179     | 12.6392       | 9.60486       | 479         | Intron (ENSMUST00000) | 4349588   | 4360020   | Ccl25    |
| Treg_2_peak_124387 | 7.49823     | 11.9232       | 8.93461       | 195         | Promoter (1-2kb)      | 4332259   | 4334807   | Ccl25    |
| Treg_2_peak_39684  | 5.78926     | 8.5388        | 5.90073       | 109         | Intron (ENSMUST00000) | 119623819 | 119654359 | Ccl28    |
| Treg_2_peak_39683  | 5.83196     | 8.66693       | 6.00946       | 139         | Promoter (<=1kb)      | 119623819 | 119654359 | Ccl28    |
| Treg_2_peak_24175  | 5.5406      | 9.37639       | 6.57036       | 156         | Promoter (<=1kb)      | 83647844  | 83649355  | Ccl3     |
| Treg_2_peak_24101  | 4.54487     | 7.11231       | 4.62813       | 129         | Promoter (<=1kb)      | 82045712  | 82047525  | Ccl7     |
| Treg_2_peak_24105  | 3.6359      | 5.41249       | 3.16527       | 107         | Distal Intergenic     | 82115185  | 82116799  | Ccl8     |
| Treg_2_peak_24106  | 3.69374     | 5.73445       | 3.33556       | 101         | Distal Intergenic     | 82115185  | 82116799  | Ccl8     |
| Treg_2_peak_24107  | 3.69374     | 5.73445       | 3.33556       | 156         | Distal Intergenic     | 82115185  | 82116799  | Ccl8     |
| Treg_2_peak_24108  | 4.99882     | 7.12189       | 4.62813       | 204         | Distal Intergenic     | 82115185  | 82116799  | Ccl8     |
| Treg_2_peak_24109  | 5.45384     | 8.8909        | 6.19058       | 113         | Distal Intergenic     | 82115185  | 82116799  | Ccl8     |
| Treg_2_peak_24110  | 7.27179     | 12.6392       | 9.60486       | 162         | Distal Intergenic     | 82115185  | 82116799  | Ccl8     |
| Treg_2_peak_24168  | 4.54487     | 7.11231       | 4.62813       | 84          | Distal Intergenic     | 83575318  | 83577142  | Ccl9     |
| Treg_2_peak_24169  | 4.4897      | 6.84221       | 4.40836       | 118         | Promoter (1-2kb)      | 83572919  | 83578636  | Ccl9     |
| Treg_2_peak_138512 | 3.51991     | 4.88833       | 2.70632       | 12          | Distal Intergenic     | 123962124 | 123968692 | Ccr1     |
| Treg_2_peak_138513 | 3.69374     | 5.73445       | 3.33556       | 84          | Distal Intergenic     | 123962124 | 123968692 | Ccr1     |
| Treg_2_peak_138514 | 3.69374     | 5.73445       | 3.33556       | 180         | Distal Intergenic     | 123962124 | 123968692 | Ccr1     |
| Treg_2_peak_138515 | 3.69374     | 5.73445       | 3.33556       | 130         | Distal Intergenic     | 123962124 | 123968692 | Ccr1     |
| Treg_2_peak_138521 | 4.61717     | 7.516         | 4.89772       | 188         | Distal Intergenic     | 124101950 | 124113557 | Ccr2     |
| Treg_2_peak_138522 | 5.5406      | 9.37639       | 6.57036       | 734         | Distal Intergenic     | 124101950 | 124113557 | Ccr2     |
| Treg_2_peak_138523 | 4.99882     | 7.12189       | 4.62813       | 187         | Distal Intergenic     | 124101950 | 124113557 | Ccr2     |
| Treg_2_peak_138524 | 3.6359      | 5.41249       | 3.16527       | 109         | Distal Intergenic     | 124101950 | 124113557 | Ccr2     |
| Treg_2_peak_138525 | 3.69374     | 5.73445       | 3.33556       | 106         | Promoter (<=1kb)      | 124105626 | 124109140 | Ccr2     |
| Treg_2_peak_138516 | 4.99882     | 7.12189       | 4.62813       | 113         | Distal Intergenic     | 124021972 | 124031689 | Ccr3     |
| Treg_2_peak_138517 | 5.35089     | 7.32162       | 4.81655       | 107         | Distal Intergenic     | 124021972 | 124031689 | Ccr3     |
| Treg_2_peak_138518 | 4.99882     | 7.12189       | 4.62813       | 125         | Distal Intergenic     | 124021972 | 124031689 | Ccr3     |
| Treg_2_peak_138519 | 6.46404     | 11.3035       | 8.33659       | 134         | Distal Intergenic     | 124021972 | 124031689 | Ccr3     |
| Treg_2_peak_138520 | 4.58325     | 7.31856       | 4.81351       | 85          | Distal Intergenic     | 124021972 | 124031689 | Ccr3     |
| Treg_2_peak_138527 | 10.7753     | 20.0586       | 16.5916       | 167         | Distal Intergenic     | 124128748 | 124147699 | Ccr5     |
| Treg_2_peak_138526 | 4.61717     | 7.516         | 4.89772       | 136         | Promoter (<=1kb)      | 124126684 | 124130250 | Ccr5     |
| Treg_2_peak_58230  | 7.27179     | 12.6392       | 9.60486       | 174         | Promoter (<=1kb)      | 8236043   | 8256108   | Ccr6     |
| Treg_2_peak_24904  | 7.49823     | 11.9232       | 8.93461       | 142         | Distal Intergenic     | 99144196  | 99155077  | Ccr7     |
| Treg_2_peak_24905  | 3.59176     | 5.19719       | 3.00172       | 154         | Distal Intergenic     | 99144196  | 99155077  | Ccr7     |
| Treg_2_peak_24903  | 4.37364     | 6.35102       | 3.93704       | 107         | Promoter (1-2kb)      | 99144196  | 99155077  | Ccr7     |
| Treg_2_peak_87666  | 4.61717     | 7.516         | 4.89772       | 137         | Promoter (1-2kb)      | 100993529 | 101029556 | Cd101    |
| Treg_2_peak_136039 | 7.38747     | 13.2885       | 10.182        | 490         | Distal Intergenic     | 78615546  | 78716253  | Cd109    |
| Treg_2_peak_65103  | 3.6359      | 5.41249       | 3.16527       | 125         | Distal Intergenic     | 36725871  | 36726738  | Cd14     |
| Treg_2_peak_87414  | 3.69374     | 5.73445       | 3.33556       | 123         | Intron (ENSMUST00000) | 96800155  | 96814521  | Cd160    |
| Treg_2_peak_87413  | 3.69374     | 5.73445       | 3.33556       | 102         | Promoter (<=1kb)      | 96800155  | 96814521  | Cd160    |
| Treg_2_peak_87412  | 12.0046     | 23.8855       | 20.2454       | 155         | Promoter (2-3kb)      | 96800155  | 96814521  | Cd160    |
| Treg_2_peak_115068 | 4.99882     | 7.12189       | 4.62813       | 195         | Exon (ENSMUST00000)   | 124304700 | 124330527 | Cd163    |
| Treg_2_peak_115067 | 4.61717     | 7.516         | 4.89772       | 114         | Promoter (2-3kb)      | 124304700 | 124330527 | Cd163    |
| Treg_2_peak_124141 | 6.10727     | 8.9785        | 6.27358       | 128         | Intron (ENSMUST00000) | 140224943 | 140228400 | Cd163i1  |
| Treg_2_peak_99082  | 9.0839      | 17.2866       | 13.9723       | 152         | Distal Intergenic     | 133221534 | 133224242 | Cd164i2  |
| Treg_2_peak_117618 | 5.27987     | 8.0993        | 5.46746       | 134         | Distal Intergenic     | 24743983  | 24760311  | Cd177    |
| Treg_2_peak_38562  | 4.61717     | 7.516         | 4.89772       | 117         | Distal Intergenic     | 102693558 | 102706955 | Cd180    |
| Treg_2_peak_38564  | 3.69374     | 5.73445       | 3.33556       | 30          | Intron (ENSMUST00000) | 102693611 | 102739504 | Cd180    |
| Treg_2_peak_38563  | 3.6359      | 5.41249       | 3.16527       | 116         | Promoter (<=1kb)      | 102693558 | 102706955 | Cd180    |
| Treg_2_peak_123432 | 6.6651      | 10.2696       | 7.44017       | 113         | Promoter (<=1kb)      | 126409362 | 126409796 | Cd19     |
| Treg_2_peak_86915  | 3.59176     | 5.19719       | 3.00172       | 110         | Distal Intergenic     | 86986551  | 86989780  | Cd1d2    |
| Treg_2_peak_86916  | 3.69374     | 5.73445       | 3.33556       | 98          | Distal Intergenic     | 86986551  | 86989780  | Cd1d2    |
| Treg_2_peak_86917  | 3.6666      | 5.57696       | 3.31807       | 111         | Distal Intergenic     | 86986551  | 86989780  | Cd1d2    |
| Treg_2_peak_86918  | 6.36282     | 10.7362       | 7.85556       | 136         | Distal Intergenic     | 86986551  | 86989780  | Cd1d2    |
| Treg_2_peak_87676  | 3.51991     | 4.88833       | 2.70632       | 275         | Distal Intergenic     | 101275908 | 101280389 | Cd2      |
| Treg_2_peak_87677  | 4.28398     | 5.38986       | 3.16527       | 165         | Distal Intergenic     | 101275908 | 101280389 | Cd2      |
| Treg_2_peak_87678  | 6.35351     | 9.39706       | 6.59071       | 122         | Promoter (1-2kb)      | 101275908 | 101280389 | Cd2      |
| Treg_2_peak_54762  | 13.7718     | 25.2339       | 21.5516       | 202         | Distal Intergenic     | 45392245  | 45400312  | Cd200    |

|                    |         |         |         |     |                        |           |           |          |
|--------------------|---------|---------|---------|-----|------------------------|-----------|-----------|----------|
| Treg_2_peak_54763  | 6.46404 | 11.3035 | 8.33659 | 136 | Distal Intergenic      | 45392245  | 45400312  | Cd200    |
| Treg_2_peak_54764  | 5.38764 | 8.56594 | 5.92038 | 107 | Downstream (1-2kb)     | 45392245  | 45400312  | Cd200    |
| Treg_2_peak_54765  | 21.6616 | 44.8466 | 40.604  | 209 | Intron (ENSMUST000000) | 45392245  | 45400312  | Cd200    |
| Treg_2_peak_54767  | 2.7703  | 4.04921 | 1.90871 | 110 | Promoter (<=1kb)       | 45392245  | 45400312  | Cd200    |
| Treg_2_peak_54768  | 3.69374 | 5.73445 | 3.33556 | 106 | Promoter (<=1kb)       | 45392245  | 45400312  | Cd200    |
| Treg_2_peak_54766  | 8.33137 | 13.6223 | 10.4966 | 150 | Promoter (2-3kb)       | 45392245  | 45400312  | Cd200    |
| Treg_2_peak_112716 | 6.6651  | 10.2696 | 7.44017 | 129 | Exon (ENSMUST000000)   | 83671215  | 83677857  | Cd207    |
| Treg_2_peak_112717 | 4.54487 | 7.11231 | 4.62813 | 112 | Promoter (2-3kb)       | 83671215  | 83677857  | Cd207    |
| Treg_2_peak_10131  | 7.49823 | 11.9232 | 8.93461 | 160 | Intron (ENSMUST000000) | 165788765 | 165870249 | Cd247    |
| Treg_2_peak_10132  | 3.69374 | 5.73445 | 3.33556 | 144 | Intron (ENSMUST000000) | 165788765 | 165870249 | Cd247    |
| Treg_2_peak_10133  | 4.61717 | 7.516   | 4.89772 | 116 | Intron (ENSMUST000000) | 165788765 | 165870249 | Cd247    |
| Treg_2_peak_10138  | 8.49082 | 13.5423 | 10.4274 | 204 | Promoter (<=1kb)       | 165858216 | 165861555 | Cd247    |
| Treg_2_peak_14385  | 7.78725 | 12.1363 | 9.14491 | 140 | Distal Intergenic      | 43578284  | 43579197  | Cd24a    |
| Treg_2_peak_134984 | 3.65138 | 5.49377 | 3.2443  | 109 | Downstream (1-2kb)     | 58535576  | 58537471  | Cd276    |
| Treg_2_peak_3673   | 24.6074 | 52.2592 | 47.8487 | 170 | Intron (ENSMUST000000) | 60746358  | 60773359  | Cd28     |
| Treg_2_peak_25628  | 15.1108 | 29.9533 | 26.1103 | 169 | Distal Intergenic      | 114890041 | 114904654 | Cd300a   |
| Treg_2_peak_25629  | 4.20636 | 5.76872 | 3.36924 | 113 | Intron (ENSMUST000000) | 114890294 | 114893470 | Cd300a   |
| Treg_2_peak_25631  | 3.68967 | 5.71003 | 3.33556 | 192 | Distal Intergenic      | 114956116 | 114969157 | Cd300c   |
| Treg_2_peak_25635  | 4.61717 | 7.516   | 4.89772 | 137 | Intron (ENSMUST000000) | 115051917 | 115062177 | Cd300e   |
| Treg_2_peak_25632  | 4.16569 | 5.64327 | 3.33556 | 155 | Promoter (1-2kb)       | 114982274 | 114989922 | Cd300ld  |
| Treg_2_peak_25633  | 3.6359  | 5.41249 | 3.16527 | 197 | Promoter (2-3kb)       | 114982274 | 114989922 | Cd300ld  |
| Treg_2_peak_25634  | 4.61717 | 7.516   | 4.89772 | 117 | Promoter (2-3kb)       | 115031486 | 115037769 | Cd300ld5 |
| Treg_2_peak_25637  | 5.45384 | 8.8909  | 6.19058 | 127 | Intron (ENSMUST000000) | 115116214 | 115133992 | Cd300lf  |
| Treg_2_peak_25636  | 9.22417 | 17.3445 | 14.0296 | 151 | Promoter (<=1kb)       | 115118848 | 115133991 | Cd300lf  |
| Treg_2_peak_74524  | 3.6666  | 5.57696 | 3.31807 | 112 | Intron (ENSMUST000000) | 60251993  | 60284488  | Cd302    |
| Treg_2_peak_59452  | 3.6359  | 5.41249 | 3.16527 | 108 | Distal Intergenic      | 33843426  | 33848751  | Cd320    |
| Treg_2_peak_11845  | 8.18077 | 14.5934 | 11.4246 | 126 | Distal Intergenic      | 194938819 | 194961279 | Cd34     |
| Treg_2_peak_11846  | 3.6359  | 5.41249 | 3.16527 | 116 | Intron (ENSMUST000000) | 194938995 | 194958550 | Cd34     |
| Treg_2_peak_100601 | 3.69374 | 5.73445 | 3.33556 | 111 | Distal Intergenic      | 17782016  | 17835696  | Cd36     |
| Treg_2_peak_100605 | 6.36282 | 10.7362 | 7.85556 | 119 | Distal Intergenic      | 17814675  | 17888801  | Cd36     |
| Treg_2_peak_100606 | 5.24837 | 7.9747  | 5.34802 | 276 | Distal Intergenic      | 17814675  | 17888801  | Cd36     |
| Treg_2_peak_100603 | 3.6359  | 5.41249 | 3.16527 | 115 | Intron (ENSMUST000000) | 17781690  | 17849792  | Cd36     |
| Treg_2_peak_100604 | 3.6359  | 5.41249 | 3.16527 | 96  | Intron (ENSMUST000000) | 17782367  | 17888747  | Cd36     |
| Treg_2_peak_100602 | 3.69374 | 5.73445 | 3.33556 | 112 | Promoter (1-2kb)       | 17781690  | 17849792  | Cd36     |
| Treg_2_peak_102022 | 8.24985 | 14.967  | 11.7883 | 149 | Distal Intergenic      | 43868553  | 43912375  | Cd38     |
| Treg_2_peak_102023 | 4.54487 | 7.11231 | 4.62813 | 135 | Distal Intergenic      | 43868553  | 43912375  | Cd38     |
| Treg_2_peak_102024 | 3.69374 | 5.73445 | 3.33556 | 109 | Distal Intergenic      | 43868553  | 43912375  | Cd38     |
| Treg_2_peak_102025 | 9.23434 | 17.4062 | 14.0484 | 194 | Promoter (2-3kb)       | 43868860  | 43869740  | Cd38     |
| Treg_2_peak_134345 | 3.69374 | 5.73445 | 3.33556 | 96  | Promoter (1-2kb)       | 44985823  | 44986421  | Cd3d     |
| Treg_2_peak_134346 | 5.45384 | 8.8909  | 6.19058 | 153 | Promoter (1-2kb)       | 44985952  | 44986422  | Cd3d     |
| Treg_2_peak_134347 | 5.5406  | 9.37639 | 6.57036 | 121 | Distal Intergenic      | 45003159  | 45009627  | Cd3e     |
| Treg_2_peak_115095 | 6.04117 | 15.3112 | 12.0866 | 120 | Promoter (2-3kb)       | 124867333 | 124888199 | Cd4      |
| Treg_2_peak_80904  | 9.16451 | 15.3628 | 12.1145 | 139 | Promoter (2-3kb)       | 165055704 | 165071000 | Cd40     |
| Treg_2_peak_140914 | 5.5406  | 9.37639 | 6.57036 | 143 | Intron (ENSMUST000000) | 57212143  | 57224042  | Cd40lg   |
| Treg_2_peak_77113  | 4.61717 | 7.516   | 4.89772 | 147 | Distal Intergenic      | 102811141 | 102901665 | Cd44     |
| Treg_2_peak_77114  | 3.69374 | 5.73445 | 3.33556 | 150 | Distal Intergenic      | 102811141 | 102901665 | Cd44     |
| Treg_2_peak_77115  | 3.69374 | 5.73445 | 3.33556 | 117 | Distal Intergenic      | 102811141 | 102901665 | Cd44     |
| Treg_2_peak_77116  | 2.7703  | 4.04921 | 1.90871 | 110 | Distal Intergenic      | 102811141 | 102901665 | Cd44     |
| Treg_2_peak_77117  | 3.69374 | 5.73445 | 3.33556 | 213 | Distal Intergenic      | 102811141 | 102901665 | Cd44     |
| Treg_2_peak_11851  | 8.72992 | 14.989  | 11.8101 | 318 | Promoter (<=1kb)       | 195036826 | 195092249 | Cd46     |
| Treg_2_peak_11852  | 4.99882 | 7.12189 | 4.62813 | 130 | Promoter (2-3kb)       | 195036826 | 195092249 | Cd46     |
| Treg_2_peak_55081  | 3.69374 | 5.73445 | 3.33556 | 107 | Distal Intergenic      | 49866833  | 49911091  | Cd47     |
| Treg_2_peak_55079  | 3.69374 | 5.73445 | 3.33556 | 102 | Intron (ENSMUST000000) | 49866833  | 49911091  | Cd47     |
| Treg_2_peak_55076  | 4.61717 | 7.516   | 4.89772 | 287 | Intron (ENSMUST000000) | 49800533  | 49911046  | Cd47     |
| Treg_2_peak_55077  | 4.61717 | 7.516   | 4.89772 | 119 | Intron (ENSMUST000000) | 49855366  | 49911091  | Cd47     |
| Treg_2_peak_55078  | 5.5406  | 9.37639 | 6.57036 | 145 | Promoter (<=1kb)       | 49866833  | 49911091  | Cd47     |
| Treg_2_peak_87981  | 9.1665  | 17.0087 | 13.7075 | 177 | Intron (ENSMUST000000) | 106759921 | 106790149 | Cd53     |
| Treg_2_peak_87980  | 4.61717 | 7.516   | 4.89772 | 125 | Intron (ENSMUST000000) | 106759921 | 106790149 | Cd53     |
| Treg_2_peak_87982  | 7.38747 | 13.2885 | 10.182  | 144 | Promoter (1-2kb)       | 106759921 | 106790149 | Cd53     |
| Treg_2_peak_8203   | 20.8284 | 42.7332 | 38.5282 | 173 | Distal Intergenic      | 130419601 | 130422740 | Cd55b    |
| Treg_2_peak_8204   | 8.18077 | 14.5934 | 11.4246 | 284 | Distal Intergenic      | 130419601 | 130422740 | Cd55b    |
| Treg_2_peak_77182  | 5.80017 | 8.57116 | 5.92547 | 110 | Intron (ENSMUST000000) | 104071066 | 104084820 | Cd59b    |
| Treg_2_peak_77183  | 6.15184 | 8.89942 | 6.19613 | 333 | Intron (ENSMUST000000) | 104071066 | 104084820 | Cd59b    |
| Treg_2_peak_86933  | 4.58325 | 7.31856 | 4.81351 | 102 | Distal Intergenic      | 87357881  | 87371073  | Cd5l     |
| Treg_2_peak_86934  | 7.3332  | 12.971  | 9.92589 | 164 | Distal Intergenic      | 87357881  | 87371073  | Cd5l     |
| Treg_2_peak_68447  | 4.49888 | 6.88526 | 4.45067 | 148 | Exon (ENSMUST000000)   | 10794564  | 10829856  | Cd6      |
| Treg_2_peak_68446  | 8.18077 | 14.5934 | 11.4246 | 130 | Intron (ENSMUST000000) | 10794564  | 10829856  | Cd6      |
| Treg_2_peak_65898  | 6.76901 | 10.5978 | 7.75479 | 127 | Promoter (<=1kb)       | 50134726  | 50135600  | Cd63-ps  |
| Treg_2_peak_65899  | 8.79978 | 15.2657 | 12.0779 | 237 | Promoter (<=1kb)       | 50134726  | 50135600  | Cd63-ps  |
| Treg_2_peak_65900  | 5.5406  | 9.37639 | 6.57036 | 169 | Promoter (1-2kb)       | 50134795  | 50135511  | Cd63-ps  |
| Treg_2_peak_115290 | 16.5688 | 34.9863 | 30.9936 | 161 | Distal Intergenic      | 129267325 | 129275436 | Cd69     |
| Treg_2_peak_115291 | 3.69374 | 5.73445 | 3.33556 | 106 | Distal Intergenic      | 129267325 | 129275436 | Cd69     |
| Treg_2_peak_115292 | 3.6666  | 5.57696 | 3.31807 | 109 | Distal Intergenic      | 129267325 | 129275436 | Cd69     |
| Treg_2_peak_115289 | 2.69382 | 3.64824 | 1.70993 | 261 | Promoter (<=1kb)       | 129267325 | 129275436 | Cd69     |
| Treg_2_peak_60623  | 3.69374 | 5.73445 | 3.33556 | 110 | Distal Intergenic      | 57145997  | 57149777  | Cd70     |
| Treg_2_peak_60624  | 6.15984 | 9.81068 | 6.99648 | 140 | Distal Intergenic      | 57145997  | 57149777  | Cd70     |
| Treg_2_peak_94068  | 6.46682 | 9.57675 | 6.76836 | 115 | Distal Intergenic      | 43447724  | 43454628  | Cd72     |
| Treg_2_peak_117628 | 4.35632 | 6.2848  | 3.87192 | 138 | Distal Intergenic      | 24897381  | 24902197  | Cd79a    |
| Treg_2_peak_25187  | 6.39973 | 9.51766 | 6.71009 | 145 | Promoter (<=1kb)       | 106311341 | 106314762 | Cd79b    |
| Treg_2_peak_54331  | 3.69374 | 5.73445 | 3.33556 | 136 | Intron (ENSMUST000000) | 38459118  | 38486447  | Cd80     |
| Treg_2_peak_124255 | 3.07592 | 3.57312 | 1.64459 | 153 | Intron (ENSMUST000000) | 143052739 | 143067934 | Cd81     |
| Treg_2_peak_76459  | 5.68624 | 7.8863  | 5.26161 | 121 | Exon (ENSMUST000000)   | 93419154  | 93420287  | Cd82     |
| Treg_2_peak_76458  | 6.6651  | 10.2696 | 7.44017 | 155 | Intron (ENSMUST000000) | 93419154  | 93420287  | Cd82     |
| Treg_2_peak_76460  | 5.6567  | 7.84563 | 5.22151 | 105 | Promoter (<=1kb)       | 93430127  | 93463140  | Cd82     |
| Treg_2_peak_35112  | 5.5406  | 9.37639 | 6.57036 | 123 | Distal Intergenic      | 43784775  | 43803132  | Cd83     |
| Treg_2_peak_35113  | 3.59911 | 5.2315  | 3.03527 | 123 | Distal Intergenic      | 43784775  | 43803132  | Cd83     |
| Treg_2_peak_35114  | 9.28197 | 15.1209 | 11.9376 | 201 | Distal Intergenic      | 43784775  | 43803132  | Cd83     |
| Treg_2_peak_10496  | 3.69374 | 5.73445 | 3.33556 | 165 | Distal Intergenic      | 171839697 | 171890718 | Cd84     |
| Treg_2_peak_10497  | 9.99872 | 18.6343 | 15.2353 | 158 | Distal Intergenic      | 171839697 | 171890718 | Cd84     |

|                    |         |         |         |     |                        |           |           |         |
|--------------------|---------|---------|---------|-----|------------------------|-----------|-----------|---------|
| Treg_2_peak_10498  | 4.60243 | 7.4283  | 4.89772 | 375 | Distal Intergenic      | 171839697 | 171890718 | Cd84    |
| Treg_2_peak_10499  | 4.85274 | 6.70311 | 4.27939 | 169 | Distal Intergenic      | 171839697 | 171890718 | Cd84    |
| Treg_2_peak_54242  | 25.1423 | 55.9747 | 51.4976 | 151 | Intron (ENSMUST000000) | 36603869  | 36666077  | Cd86    |
| Treg_2_peak_54241  | 9.16451 | 15.3628 | 12.1145 | 194 | Intron (ENSMUST000000) | 36620713  | 36642805  | Cd86    |
| Treg_2_peak_54240  | 4.16569 | 5.64327 | 3.33556 | 150 | Intron (ENSMUST000000) | 36603897  | 36604519  | Cd86    |
| Treg_2_peak_54243  | 3.6359  | 5.41249 | 3.16527 | 103 | Promoter (<=1kb)       | 36603869  | 36666077  | Cd86    |
| Treg_2_peak_111871 | 11.6732 | 22.1172 | 18.5566 | 135 | Exon (ENSMUST000000)   | 71322788  | 71337494  | Cd8b1   |
| Treg_2_peak_111870 | 3.33255 | 4.24299 | 2.08194 | 74  | Promoter (<=1kb)       | 71322788  | 71337494  | Cd8b1   |
| Treg_2_peak_115110 | 7.03982 | 11.5798 | 8.60681 | 137 | Intron (ENSMUST000000) | 125460266 | 125494791 | Cd9     |
| Treg_2_peak_80020  | 16.8914 | 32.7027 | 28.7754 | 198 | Distal Intergenic      | 148436640 | 148443563 | Cd93    |
| Treg_2_peak_80021  | 4.54487 | 7.11231 | 4.62813 | 186 | Distal Intergenic      | 148436640 | 148443563 | Cd93    |
| Treg_2_peak_80019  | 9.99764 | 17.1409 | 13.8303 | 169 | Downstream (<1kb)      | 148436640 | 148443563 | Cd93    |
| Treg_2_peak_54819  | 5.45384 | 8.8909  | 6.19058 | 121 | Distal Intergenic      | 46035657  | 46120251  | Cd96    |
| Treg_2_peak_54818  | 4.51736 | 6.97411 | 4.53802 | 111 | Intron (ENSMUST000000) | 46035657  | 46120251  | Cd96    |
| Treg_2_peak_69872  | 3.69374 | 5.73445 | 3.33556 | 112 | Distal Intergenic      | 34300075  | 34316677  | Fas     |
| Treg_2_peak_69873  | 6.46404 | 11.3035 | 8.33659 | 167 | Distal Intergenic      | 34300075  | 34316677  | Fas     |
| Treg_2_peak_69874  | 3.6359  | 5.41249 | 3.16527 | 94  | Distal Intergenic      | 34300075  | 34316677  | Fas     |
| Treg_2_peak_69871  | 4.61717 | 7.516   | 4.89772 | 83  | Intron (ENSMUST000000) | 34300075  | 34316677  | Fas     |
| Treg_2_peak_69869  | 5.5406  | 9.37639 | 6.57036 | 159 | Promoter (1-2kb)       | 34300075  | 34316677  | Fas     |
| Treg_2_peak_9912   | 3.69374 | 5.73445 | 3.33556 | 119 | Distal Intergenic      | 161781422 | 161788358 | Fasl    |
| Treg_2_peak_9913   | 4.61717 | 7.516   | 4.89772 | 120 | Distal Intergenic      | 161781422 | 161788358 | Fasl    |
| Treg_2_peak_9914   | 5.45384 | 8.8909  | 6.19058 | 131 | Promoter (2-3kb)       | 161780689 | 161788495 | Fasl    |
| Treg_2_peak_18974  | 3.59176 | 5.19719 | 3.00172 | 112 | Distal Intergenic      | 118441046 | 118445892 | lfng    |
| Treg_2_peak_18975  | 14.367  | 28.4773 | 24.6642 | 205 | Distal Intergenic      | 118441046 | 118445892 | lfng    |
| Treg_2_peak_18976  | 3.69374 | 5.73445 | 3.33556 | 108 | Distal Intergenic      | 118441046 | 118445892 | lfng    |
| Treg_2_peak_18977  | 4.99882 | 7.12189 | 4.62813 | 146 | Distal Intergenic      | 118441046 | 118445892 | lfng    |
| Treg_2_peak_18987  | 4.61717 | 7.516   | 4.89772 | 129 | Distal Intergenic      | 118502035 | 118556525 | lfngas1 |
| Treg_2_peak_18988  | 4.45334 | 6.67838 | 4.25491 | 121 | Distal Intergenic      | 118502035 | 118556525 | lfngas1 |
| Treg_2_peak_18989  | 3.69374 | 5.73445 | 3.33556 | 150 | Distal Intergenic      | 118502035 | 118556525 | lfngas1 |
| Treg_2_peak_18990  | 30.9051 | 72.4915 | 67.7773 | 166 | Distal Intergenic      | 118502035 | 118556525 | lfngas1 |
| Treg_2_peak_18991  | 9.99872 | 18.6343 | 15.2353 | 236 | Distal Intergenic      | 118502035 | 118556525 | lfngas1 |
| Treg_2_peak_18985  | 5.27987 | 8.0993  | 5.46746 | 142 | Intron (ENSMUST000000) | 118502035 | 118556525 | lfngas1 |
| Treg_2_peak_18986  | 4.4897  | 6.84221 | 4.40836 | 272 | Intron (ENSMUST000000) | 118502035 | 118556525 | lfngas1 |
| Treg_2_peak_18984  | 12.6919 | 23.2946 | 19.6948 | 155 | Intron (ENSMUST000000) | 118502035 | 118556525 | lfngas1 |
| Treg_2_peak_18983  | 3.69374 | 5.73445 | 3.33556 | 110 | Intron (ENSMUST000000) | 118502035 | 118556525 | lfngas1 |
| Treg_2_peak_12912  | 3.69374 | 5.73445 | 3.33556 | 102 | Distal Intergenic      | 19591949  | 19610229  | lfngr1  |
| Treg_2_peak_12913  | 2.72692 | 3.80885 | 1.81786 | 59  | Distal Intergenic      | 19591949  | 19610229  | lfngr1  |
| Treg_2_peak_12914  | 10.7533 | 19.9563 | 16.495  | 136 | Distal Intergenic      | 19605919  | 19609256  | lfngr1  |
| Treg_2_peak_12915  | 7.76448 | 12.8063 | 9.76846 | 146 | Distal Intergenic      | 19605919  | 19609256  | lfngr1  |
| Treg_2_peak_57647  | 4.99798 | 6.6355  | 4.21298 | 109 | Downstream (1-2kb)     | 91561323  | 91565169  | lfngr2  |
| Treg_2_peak_57646  | 6.24064 | 8.99819 | 6.29309 | 119 | Promoter (2-3kb)       | 91547072  | 91565623  | lfngr2  |
| Treg_2_peak_8244   | 4.54487 | 7.11231 | 4.62813 | 102 | Distal Intergenic      | 131019845 | 131024974 | ll10    |
| Treg_2_peak_8245   | 3.69374 | 5.73445 | 3.33556 | 96  | Distal Intergenic      | 131019845 | 131024974 | ll10    |
| Treg_2_peak_8246   | 4.54487 | 7.11231 | 4.62813 | 199 | Distal Intergenic      | 131019845 | 131024974 | ll10    |
| Treg_2_peak_8247   | 4.4897  | 6.84221 | 4.40836 | 116 | Distal Intergenic      | 131019845 | 131024974 | ll10    |
| Treg_2_peak_8248   | 4.98095 | 7.06806 | 4.62813 | 111 | Distal Intergenic      | 131019845 | 131024974 | ll10    |
| Treg_2_peak_94026  | 10.388  | 18.1473 | 14.7785 | 165 | Promoter (<=1kb)       | 41767799  | 41769474  | ll11ra1 |
| Treg_2_peak_85743  | 4.61717 | 7.516   | 4.89772 | 123 | Distal Intergenic      | 68690644  | 68698547  | ll12a   |
| Treg_2_peak_85744  | 5.5406  | 9.37639 | 6.57036 | 116 | Distal Intergenic      | 68690644  | 68698547  | ll12a   |
| Treg_2_peak_85746  | 6.15184 | 8.89942 | 6.19613 | 462 | Distal Intergenic      | 68694021  | 68698547  | ll12a   |
| Treg_2_peak_85745  | 3.62133 | 5.33889 | 3.14027 | 94  | Promoter (2-3kb)       | 68690644  | 68698547  | ll12a   |
| Treg_2_peak_22154  | 3.69374 | 5.73445 | 3.33556 | 119 | Distal Intergenic      | 44400063  | 44414033  | ll12b   |
| Treg_2_peak_22152  | 3.69374 | 5.73445 | 3.33556 | 99  | Exon (ENSMUST000001)   | 44400063  | 44414033  | ll12b   |
| Treg_2_peak_22153  | 4.61717 | 7.516   | 4.89772 | 118 | Intron (ENSMUST000000) | 44400063  | 44414033  | ll12b   |
| Treg_2_peak_111628 | 14.7749 | 30.6564 | 26.7723 | 151 | Intron (ENSMUST000000) | 67291318  | 67339694  | ll12rb2 |
| Treg_2_peak_111626 | 7.38747 | 13.2885 | 10.182  | 181 | Intron (ENSMUST000000) | 67291318  | 67339694  | ll12rb2 |
| Treg_2_peak_111627 | 3.69374 | 5.73445 | 3.33556 | 138 | Intron (ENSMUST000000) | 67291318  | 67339694  | ll12rb2 |
| Treg_2_peak_111625 | 3.69374 | 5.73445 | 3.33556 | 186 | Intron (ENSMUST000000) | 67291318  | 67339694  | ll12rb2 |
| Treg_2_peak_139991 | 5.5406  | 9.37639 | 6.57036 | 128 | Distal Intergenic      | 36112110  | 36171259  | ll13ra1 |
| Treg_2_peak_139992 | 9.99872 | 18.6343 | 15.2353 | 140 | Distal Intergenic      | 36112110  | 36171259  | ll13ra1 |
| Treg_2_peak_139993 | 3.69374 | 5.73445 | 3.33556 | 110 | Intron (ENSMUST000000) | 36112110  | 36171259  | ll13ra1 |
| Treg_2_peak_145119 | 4.65586 | 6.20186 | 3.79026 | 106 | Distal Intergenic      | 147383478 | 147403832 | ll13ra2 |
| Treg_2_peak_145120 | 7.97318 | 12.3792 | 9.37861 | 121 | Distal Intergenic      | 147383478 | 147403832 | ll13ra2 |
| Treg_2_peak_145121 | 3.69374 | 5.73445 | 3.33556 | 131 | Distal Intergenic      | 147383478 | 147403832 | ll13ra2 |
| Treg_2_peak_145122 | 3.69374 | 5.73445 | 3.33556 | 143 | Distal Intergenic      | 147383478 | 147403832 | ll13ra2 |
| Treg_2_peak_145123 | 3.8449  | 4.79884 | 2.62253 | 109 | Distal Intergenic      | 147383478 | 147403832 | ll13ra2 |
| Treg_2_peak_145124 | 5.5406  | 9.37639 | 6.57036 | 131 | Distal Intergenic      | 147383478 | 147403832 | ll13ra2 |
| Treg_2_peak_145125 | 3.69374 | 5.73445 | 3.33556 | 97  | Distal Intergenic      | 147383478 | 147403832 | ll13ra2 |
| Treg_2_peak_145126 | 5.83196 | 8.66693 | 6.00946 | 138 | Distal Intergenic      | 147383478 | 147403832 | ll13ra2 |
| Treg_2_peak_145127 | 2.7703  | 4.04921 | 1.90871 | 46  | Distal Intergenic      | 147383478 | 147403832 | ll13ra2 |
| Treg_2_peak_145128 | 4.61717 | 7.516   | 4.89772 | 107 | Distal Intergenic      | 147383478 | 147403832 | ll13ra2 |
| Treg_2_peak_145130 | 4.54487 | 7.11231 | 4.62813 | 137 | Intron (ENSMUST000000) | 147383478 | 147403832 | ll13ra2 |
| Treg_2_peak_145129 | 2.72692 | 3.80885 | 1.81786 | 112 | Promoter (1-2kb)       | 147383478 | 147403832 | ll13ra2 |
| Treg_2_peak_129177 | 5.5406  | 9.37639 | 6.57036 | 76  | Distal Intergenic      | 82331914  | 82344473  | ll15    |
| Treg_2_peak_129183 | 2.72692 | 3.80885 | 1.81786 | 112 | Intron (ENSMUST000000) | 82345662  | 82398627  | ll15    |
| Treg_2_peak_129179 | 3.69374 | 5.73445 | 3.33556 | 103 | Intron (ENSMUST000000) | 82331739  | 82345683  | ll15    |
| Treg_2_peak_129180 | 2.72692 | 3.80885 | 1.81786 | 127 | Intron (ENSMUST000000) | 82331739  | 82345683  | ll15    |
| Treg_2_peak_129181 | 5.5406  | 9.37639 | 6.57036 | 133 | Intron (ENSMUST000000) | 82331739  | 82345683  | ll15    |
| Treg_2_peak_129182 | 3.69374 | 5.73445 | 3.33556 | 103 | Intron (ENSMUST000000) | 82331739  | 82345683  | ll15    |
| Treg_2_peak_129178 | 3.69374 | 5.73445 | 3.33556 | 99  | Intron (ENSMUST000000) | 82331914  | 82344473  | ll15    |
| Treg_2_peak_129184 | 15.5595 | 30.3521 | 26.5025 | 135 | Promoter (<=1kb)       | 82345662  | 82398627  | ll15    |
| Treg_2_peak_71792  | 3.6359  | 5.41249 | 3.16527 | 196 | Promoter (<=1kb)       | 11718431  | 11733417  | ll15ra  |
| Treg_2_peak_120953 | 3.6666  | 5.57696 | 3.31807 | 225 | Distal Intergenic      | 83660897  | 83745726  | ll16    |
| Treg_2_peak_120951 | 8.09799 | 14.1818 | 11.045  | 202 | Intron (ENSMUST000000) | 83722510  | 83732407  | ll16    |
| Treg_2_peak_120947 | 5.5406  | 9.37639 | 6.57036 | 203 | Promoter (<=1kb)       | 83649576  | 83655325  | ll16    |
| Treg_2_peak_120952 | 3.5699  | 5.09832 | 2.91222 | 380 | Promoter (2-3kb)       | 83722510  | 83732407  | ll16    |
| Treg_2_peak_1286   | 3.69374 | 5.73445 | 3.33556 | 359 | Promoter (<=1kb)       | 20777679  | 20779554  | ll17f   |
| Treg_2_peak_1285   | 9.08974 | 16.5931 | 13.3034 | 174 | Promoter (2-3kb)       | 20777679  | 20779554  | ll17f   |
| Treg_2_peak_114818 | 3.59176 | 5.19719 | 3.00172 | 148 | Distal Intergenic      | 120463247 | 120483729 | ll17ra  |

|                    |         |         |         |     |                        |           |           |         |
|--------------------|---------|---------|---------|-----|------------------------|-----------|-----------|---------|
| Treg_2_peak_114819 | 5.5406  | 9.37639 | 6.57036 | 121 | Distal Intergenic      | 120463247 | 120483729 | II17ra  |
| Treg_2_peak_114820 | 9.08974 | 16.5931 | 13.3034 | 205 | Distal Intergenic      | 120463247 | 120483729 | II17ra  |
| Treg_2_peak_41166  | 3.68967 | 5.71003 | 3.33556 | 116 | Promoter (<=1kb)       | 29996471  | 30000094  | II17rb  |
| Treg_2_peak_41167  | 6.45965 | 9.36103 | 6.57036 | 139 | Promoter (2-3kb)       | 29996199  | 30008809  | II17rb  |
| Treg_2_peak_40973  | 8.18077 | 14.5934 | 11.4246 | 495 | Intron (ENSMUST000000) | 27067397  | 27100976  | II17rd  |
| Treg_2_peak_40974  | 4.99882 | 7.12189 | 4.62813 | 110 | Intron (ENSMUST000000) | 27067397  | 27100976  | II17rd  |
| Treg_2_peak_40975  | 4.4897  | 6.84221 | 4.40836 | 203 | Intron (ENSMUST000000) | 27067397  | 27100976  | II17rd  |
| Treg_2_peak_40976  | 4.16569 | 5.64327 | 3.33556 | 116 | Intron (ENSMUST000000) | 27067397  | 27100976  | II17rd  |
| Treg_2_peak_40977  | 6.28558 | 10.3563 | 7.5188  | 132 | Intron (ENSMUST000000) | 27087765  | 27101491  | II17rd  |
| Treg_2_peak_40978  | 10.9077 | 20.7131 | 17.2181 | 148 | Promoter (1-2kb)       | 27087765  | 27101491  | II17rd  |
| Treg_2_peak_114479 | 3.29576 | 4.13512 | 1.99322 | 32  | Distal Intergenic      | 113458484 | 113470758 | II17re  |
| Treg_2_peak_134606 | 4.61717 | 7.516   | 4.89772 | 117 | Intron (ENSMUST000000) | 50554827  | 50581840  | II18    |
| Treg_2_peak_134607 | 4.61717 | 7.516   | 4.89772 | 246 | Promoter (2-3kb)       | 50556374  | 50581837  | II18    |
| Treg_2_peak_2439   | 4.54487 | 7.11231 | 4.62813 | 134 | Intron (ENSMUST000000) | 40466006  | 40500854  | II18r1  |
| Treg_2_peak_2440   | 4.61717 | 7.516   | 4.89772 | 165 | Intron (ENSMUST000000) | 40466006  | 40500854  | II18r1  |
| Treg_2_peak_2441   | 4.54487 | 7.11231 | 4.62813 | 89  | Intron (ENSMUST000000) | 40466006  | 40500854  | II18r1  |
| Treg_2_peak_2446   | 3.6359  | 5.41249 | 3.16527 | 139 | Distal Intergenic      | 40541692  | 40547903  | II18rap |
| Treg_2_peak_2444   | 3.6359  | 5.41249 | 3.16527 | 153 | Exon (ENSMUST000000)   | 40515448  | 40526917  | II18rap |
| Treg_2_peak_2442   | 9.16451 | 15.3628 | 12.1145 | 491 | Intron (ENSMUST000000) | 40515362  | 40551705  | II18rap |
| Treg_2_peak_2443   | 4.54487 | 7.11231 | 4.62813 | 129 | Intron (ENSMUST000000) | 40515362  | 40551705  | II18rap |
| Treg_2_peak_2445   | 3.69374 | 5.73445 | 3.33556 | 102 | Promoter (1-2kb)       | 40541692  | 40547903  | II18rap |
| Treg_2_peak_8239   | 5.5406  | 9.37639 | 6.57036 | 388 | Distal Intergenic      | 130932816 | 130940115 | II19    |
| Treg_2_peak_8240   | 9.1665  | 17.0087 | 13.7075 | 159 | Distal Intergenic      | 130932816 | 130940115 | II19    |
| Treg_2_peak_8241   | 3.69374 | 5.73445 | 3.33556 | 126 | Distal Intergenic      | 130932816 | 130940115 | II19    |
| Treg_2_peak_8242   | 4.58325 | 7.31856 | 4.81351 | 123 | Distal Intergenic      | 130932816 | 130940115 | II19    |
| Treg_2_peak_8243   | 6.42995 | 11.1022 | 8.20899 | 128 | Distal Intergenic      | 130932816 | 130940115 | II19    |
| Treg_2_peak_8237   | 4.54487 | 7.11231 | 4.62813 | 128 | Exon (ENSMUST000000)   | 130932658 | 130939241 | II19    |
| Treg_2_peak_8744   | 3.6359  | 5.41249 | 3.16527 | 172 | Promoter (<=1kb)       | 129369897 | 129375748 | II1bos  |
| Treg_2_peak_72630  | 5.38286 | 7.47221 | 4.89772 | 120 | Distal Intergenic      | 24291196  | 24293820  | II1f10  |
| Treg_2_peak_72628  | 3.6359  | 5.41249 | 3.16527 | 134 | Promoter (<=1kb)       | 24277282  | 24281629  | II1f5   |
| Treg_2_peak_72619  | 6.36282 | 10.7362 | 7.85556 | 151 | Intron (ENSMUST000000) | 24215505  | 24225525  | II1f6   |
| Treg_2_peak_72620  | 4.99882 | 7.12189 | 4.62813 | 125 | Intron (ENSMUST000000) | 24215505  | 24225525  | II1f6   |
| Treg_2_peak_72618  | 3.6666  | 5.57696 | 3.31807 | 108 | Promoter (1-2kb)       | 24215505  | 24225525  | II1f6   |
| Treg_2_peak_72613  | 6.46404 | 11.3035 | 8.33659 | 239 | Distal Intergenic      | 24153161  | 24160519  | II1f8   |
| Treg_2_peak_72614  | 5.45384 | 8.8909  | 6.19058 | 207 | Distal Intergenic      | 24153161  | 24160519  | II1f8   |
| Treg_2_peak_72615  | 6.36282 | 10.7362 | 7.85556 | 151 | Distal Intergenic      | 24153161  | 24160519  | II1f8   |
| Treg_2_peak_72617  | 5.68243 | 8.23372 | 5.6002  | 186 | Distal Intergenic      | 24153161  | 24160519  | II1f8   |
| Treg_2_peak_72616  | 4.61717 | 7.516   | 4.89772 | 222 | Promoter (<=1kb)       | 24153161  | 24160519  | II1f8   |
| Treg_2_peak_2421   | 3.6359  | 5.41249 | 3.16527 | 131 | Distal Intergenic      | 40225080  | 40317257  | II1r1   |
| Treg_2_peak_2422   | 3.69374 | 5.73445 | 3.33556 | 104 | Distal Intergenic      | 40225080  | 40317257  | II1r1   |
| Treg_2_peak_2423   | 4.61717 | 7.516   | 4.89772 | 127 | Distal Intergenic      | 40225080  | 40317257  | II1r1   |
| Treg_2_peak_2424   | 3.69374 | 5.73445 | 3.33556 | 255 | Promoter (<=1kb)       | 40225080  | 40317257  | II1r1   |
| Treg_2_peak_2425   | 3.68967 | 5.71003 | 3.33556 | 57  | Promoter (1-2kb)       | 40225080  | 40317257  | II1r1   |
| Treg_2_peak_2411   | 8.3109  | 15.3245 | 12.0866 | 127 | Distal Intergenic      | 40074079  | 40112136  | II1r2   |
| Treg_2_peak_2412   | 9.53279 | 15.651  | 12.4006 | 178 | Promoter (<=1kb)       | 40074079  | 40112136  | II1r2   |
| Treg_2_peak_2413   | 5.4999  | 9.13896 | 6.42463 | 128 | Promoter (<=1kb)       | 40084698  | 40125231  | II1r2   |
| Treg_2_peak_53715  | 6.46404 | 11.3035 | 8.33659 | 213 | Distal Intergenic      | 26581704  | 26725264  | II1rap  |
| Treg_2_peak_53716  | 3.69374 | 5.73445 | 3.33556 | 123 | Intron (ENSMUST000000) | 26624156  | 26715068  | II1rap  |
| Treg_2_peak_53717  | 7.38747 | 13.2885 | 10.182  | 119 | Intron (ENSMUST000000) | 26624156  | 26715068  | II1rap  |
| Treg_2_peak_53720  | 3.69374 | 5.73445 | 3.33556 | 94  | Intron (ENSMUST000000) | 26722434  | 26730117  | II1rap  |
| Treg_2_peak_53718  | 6.36282 | 10.7362 | 7.85556 | 178 | Intron (ENSMUST000000) | 26624156  | 26715068  | II1rap  |
| Treg_2_peak_53719  | 5.5406  | 9.37639 | 6.57036 | 118 | Intron (ENSMUST000000) | 26624156  | 26715068  | II1rap  |
| Treg_2_peak_53723  | 17.0609 | 35.0754 | 31.0786 | 277 | Intron (ENSMUST000000) | 26727042  | 26728228  | II1rap  |
| Treg_2_peak_53722  | 3.6359  | 5.41249 | 3.16527 | 196 | Promoter (<=1kb)       | 26722434  | 26730117  | II1rap  |
| Treg_2_peak_142371 | 4.61717 | 7.516   | 4.89772 | 141 | Intron (ENSMUST000000) | 86740870  | 88115645  | II1rap1 |
| Treg_2_peak_142370 | 3.69374 | 5.73445 | 3.33556 | 172 | Intron (ENSMUST000000) | 86740870  | 88115645  | II1rap1 |
| Treg_2_peak_142357 | 4.41756 | 6.52649 | 4.10642 | 135 | Intron (ENSMUST000000) | 86747242  | 87890235  | II1rap1 |
| Treg_2_peak_142358 | 9.23434 | 17.4062 | 14.0484 | 179 | Intron (ENSMUST000000) | 86747242  | 87890235  | II1rap1 |
| Treg_2_peak_144669 | 5.5406  | 9.37639 | 6.57036 | 138 | Distal Intergenic      | 137570608 | 138846946 | II1rap2 |
| Treg_2_peak_144670 | 5.25883 | 8.01554 | 5.38817 | 122 | Distal Intergenic      | 137570608 | 138846946 | II1rap2 |
| Treg_2_peak_144671 | 4.61717 | 7.516   | 4.89772 | 116 | Distal Intergenic      | 137570608 | 138846946 | II1rap2 |
| Treg_2_peak_144672 | 3.69374 | 5.73445 | 3.33556 | 110 | Distal Intergenic      | 137570608 | 138846946 | II1rap2 |
| Treg_2_peak_144673 | 3.69374 | 5.73445 | 3.33556 | 112 | Distal Intergenic      | 137570608 | 138846946 | II1rap2 |
| Treg_2_peak_144674 | 8.18077 | 14.5934 | 11.4246 | 166 | Distal Intergenic      | 137570608 | 138846946 | II1rap2 |
| Treg_2_peak_144675 | 3.69374 | 5.73445 | 3.33556 | 116 | Distal Intergenic      | 137570608 | 138846946 | II1rap2 |
| Treg_2_peak_144676 | 4.61717 | 7.516   | 4.89772 | 157 | Distal Intergenic      | 137570608 | 138846946 | II1rap2 |
| Treg_2_peak_144677 | 8.3109  | 15.3245 | 12.0866 | 217 | Distal Intergenic      | 137570608 | 138846946 | II1rap2 |
| Treg_2_peak_144678 | 4.61717 | 7.516   | 4.89772 | 107 | Distal Intergenic      | 137570608 | 138846946 | II1rap2 |
| Treg_2_peak_144679 | 3.69374 | 5.73445 | 3.33556 | 165 | Distal Intergenic      | 137570608 | 138846946 | II1rap2 |
| Treg_2_peak_144680 | 17.4527 | 37.1153 | 33.0614 | 172 | Intron (ENSMUST000000) | 137571019 | 138506311 | II1rap2 |
| Treg_2_peak_144681 | 4.61717 | 7.516   | 4.89772 | 243 | Intron (ENSMUST000000) | 137571019 | 138506311 | II1rap2 |
| Treg_2_peak_144682 | 2.7703  | 4.04921 | 1.90871 | 134 | Intron (ENSMUST000000) | 137571019 | 138506311 | II1rap2 |
| Treg_2_peak_144687 | 4.61717 | 7.516   | 4.89772 | 140 | Intron (ENSMUST000000) | 137651720 | 138846624 | II1rap2 |
| Treg_2_peak_144685 | 4.61717 | 7.516   | 4.89772 | 228 | Intron (ENSMUST000000) | 137651720 | 138846624 | II1rap2 |
| Treg_2_peak_144686 | 6.46404 | 11.3035 | 8.33659 | 679 | Intron (ENSMUST000000) | 137651720 | 138846624 | II1rap2 |
| Treg_2_peak_2433   | 7.38747 | 13.2885 | 10.182  | 130 | Distal Intergenic      | 40429570  | 40446723  | II1r1   |
| Treg_2_peak_2434   | 8.79978 | 15.2657 | 12.0779 | 638 | Distal Intergenic      | 40429570  | 40446723  | II1r1   |
| Treg_2_peak_2435   | 12.9281 | 26.1132 | 22.3932 | 273 | Distal Intergenic      | 40429570  | 40446723  | II1r1   |
| Treg_2_peak_2436   | 7.27179 | 12.6392 | 9.60486 | 130 | Distal Intergenic      | 40429570  | 40446723  | II1r1   |
| Treg_2_peak_2437   | 4.54487 | 7.11231 | 4.62813 | 101 | Distal Intergenic      | 40429570  | 40446723  | II1r1   |
| Treg_2_peak_2438   | 8.3109  | 15.3245 | 12.0866 | 372 | Intron (ENSMUST000000) | 40440628  | 40465396  | II1r1   |
| Treg_2_peak_2428   | 6.6651  | 10.2696 | 7.44017 | 213 | Distal Intergenic      | 40324610  | 40329441  | II1r2   |
| Treg_2_peak_2429   | 4.43538 | 6.60105 | 4.17962 | 158 | Distal Intergenic      | 40324610  | 40329441  | II1r2   |
| Treg_2_peak_2427   | 8.3109  | 15.3245 | 12.0866 | 142 | Intron (ENSMUST000000) | 40324610  | 40329441  | II1r2   |
| Treg_2_peak_2430   | 6.26002 | 10.2388 | 7.41941 | 166 | Intron (ENSMUST000000) | 40325611  | 40329171  | II1r2   |
| Treg_2_peak_72633  | 4.61717 | 7.516   | 4.89772 | 137 | Intron (ENSMUST000000) | 24345288  | 24349807  | II1rn   |
| Treg_2_peak_83703  | 7.38747 | 13.2885 | 10.182  | 176 | Distal Intergenic      | 37120523  | 37125959  | II2     |
| Treg_2_peak_8234   | 7.49823 | 11.9232 | 8.93461 | 128 | Distal Intergenic      | 130907415 | 130911226 | II20    |
| Treg_2_peak_8235   | 3.69374 | 5.73445 | 3.33556 | 109 | Distal Intergenic      | 130907415 | 130911226 | II20    |



Table S9: Narrow peaks ChIPseeker annotation of HDAC8 in Treg cells (3)

| name              | signalValue | '-log10pvalue | '-log10qvalue | peak_summit | annotation              | geneStart | geneEnd   | geneName |
|-------------------|-------------|---------------|---------------|-------------|-------------------------|-----------|-----------|----------|
| Treg_3_peak_8968  | 12.3944     | 22.362        | 18.1596       | 161         | Distal Intergenic       | 82176657  | 82305690  | Ccl1     |
| Treg_3_peak_8960  | 5.40459     | 7.41211       | 4.32469       | 130         | Distal Intergenic       | 82176657  | 82179812  | Ccl1     |
| Treg_3_peak_8961  | 4.19571     | 5.73537       | 2.89041       | 118         | Distal Intergenic       | 82176657  | 82179812  | Ccl1     |
| Treg_3_peak_8966  | 4.15656     | 5.14039       | 2.50004       | 257         | Intron (ENSMUST0000013) | 82176657  | 82305690  | Ccl1     |
| Treg_3_peak_8965  | 9.23057     | 15.5688       | 11.7215       | 218         | Intron (ENSMUST0000013) | 82176659  | 82179812  | Ccl1     |
| Treg_3_peak_8962  | 5.72948     | 8.36552       | 5.18008       | 129         | Intron (ENSMUST0000013) | 82176659  | 82179812  | Ccl1     |
| Treg_3_peak_8963  | 5.72948     | 8.36552       | 5.18008       | 58          | Intron (ENSMUST0000013) | 82176659  | 82179812  | Ccl1     |
| Treg_3_peak_8964  | 3.35657     | 4.31618       | 1.74912       | 159         | Intron (ENSMUST0000013) | 82176659  | 82179812  | Ccl1     |
| Treg_3_peak_8967  | 4.75144     | 6.43742       | 3.52783       | 114         | Promoter (1-2kb)        | 82176657  | 82305690  | Ccl1     |
| Treg_3_peak_8957  | 6.84239     | 10.194        | 6.80657       | 292         | Distal Intergenic       | 82057823  | 82062955  | Ccl11    |
| Treg_3_peak_48919 | 13.4624     | 24.5259       | 20.2379       | 150         | Distal Intergenic       | 94810453  | 94812036  | Ccl17    |
| Treg_3_peak_1649  | 7.36648     | 11.5336       | 8.01027       | 142         | Distal Intergenic       | 83116793  | 83119167  | Ccl20    |
| Treg_3_peak_1648  | 4.09249     | 5.4299        | 2.7156        | 175         | Distal Intergenic       | 83116766  | 83119166  | Ccl20    |
| Treg_3_peak_48915 | 4.19571     | 5.73537       | 2.89041       | 80          | Distal Intergenic       | 94745590  | 94751699  | Ccl22    |
| Treg_3_peak_48916 | 3.60306     | 4.16554       | 1.74912       | 321         | Distal Intergenic       | 94745590  | 94751699  | Ccl22    |
| Treg_3_peak_48917 | 3.24875     | 4.00398       | 1.68449       | 113         | Distal Intergenic       | 94745590  | 94751699  | Ccl22    |
| Treg_3_peak_48918 | 4.91099     | 6.86453       | 3.89362       | 113         | Intron (ENSMUST0000003) | 94745680  | 94749873  | Ccl22    |
| Treg_3_peak_40213 | 5.874       | 8.79695       | 5.52216       | 146         | Distal Intergenic       | 135570580 | 135573049 | Ccl24    |
| Treg_3_peak_40212 | 3.4638      | 4.00435       | 1.68449       | 206         | Distal Intergenic       | 135570580 | 135573049 | Ccl24    |
| Treg_3_peak_40211 | 5.32186     | 7.33064       | 4.25169       | 106         | Downstream (<1kb)       | 135569937 | 135573049 | Ccl24    |
| Treg_3_peak_46947 | 10.6405     | 18.3874       | 14.3776       | 268         | Promoter (1-2kb)        | 4332259   | 4334807   | Ccl25    |
| Treg_3_peak_8995  | 16.37       | 31.5605       | 27.0276       | 170         | Intron (ENSMUST0000012) | 83587882  | 83593087  | Ccl6     |
| Treg_3_peak_8958  | 7.12716     | 10.8861       | 7.41243       | 119         | Distal Intergenic       | 82115185  | 82116799  | Ccl8     |
| Treg_3_peak_8959  | 5.03486     | 7.23294       | 4.1628        | 136         | Distal Intergenic       | 82115185  | 82116799  | Ccl8     |
| Treg_3_peak_8994  | 4.38634     | 5.59955       | 2.86402       | 202         | Distal Intergenic       | 83575318  | 83577142  | Ccl9     |
| Treg_3_peak_52720 | 4.19571     | 5.73537       | 2.89041       | 90          | Promoter (<=1kb)        | 123962124 | 123968622 | Ccr1     |
| Treg_3_peak_52721 | 12.4697     | 22.3446       | 18.1451       | 147         | Distal Intergenic       | 123977243 | 123978408 | Ccr11    |
| Treg_3_peak_52723 | 4.19571     | 5.73537       | 2.89041       | 155         | Promoter (<=1kb)        | 124101950 | 124113557 | Ccr2     |
| Treg_3_peak_52722 | 5.72948     | 8.36552       | 5.18008       | 122         | Distal Intergenic       | 124021972 | 124031689 | Ccr3     |
| Treg_3_peak_52724 | 6.23484     | 8.91071       | 5.61864       | 202         | Distal Intergenic       | 124128748 | 124147699 | Ccr5     |
| Treg_3_peak_21824 | 5.874       | 8.79695       | 5.52216       | 152         | Promoter (<=1kb)        | 8236043   | 8256108   | Ccr6     |
| Treg_3_peak_21825 | 3.91071     | 4.95521       | 2.35137       | 109         | Promoter (<=1kb)        | 8245065   | 8257120   | Ccr6     |
| Treg_3_peak_21826 | 6.13188     | 8.71216       | 5.50146       | 159         | Promoter (2-3kb)        | 8245065   | 8257120   | Ccr6     |
| Treg_3_peak_9337  | 4.89402     | 6.8168        | 3.89225       | 110         | Distal Intergenic       | 99144196  | 99155077  | Ccr7     |
| Treg_3_peak_52610 | 7.04128     | 10.7895       | 7.32935       | 122         | Distal Intergenic       | 120092114 | 120094906 | Ccr8     |
| Treg_3_peak_3453  | 4.91099     | 6.86453       | 3.89362       | 122         | Distal Intergenic       | 161780689 | 161788495 | FasI     |
| Treg_3_peak_6921  | 4.13148     | 5.54171       | 2.81239       | 162         | Distal Intergenic       | 118441046 | 11845892  | Irfng    |
| Treg_3_peak_6929  | 7.31056     | 11.0477       | 7.56841       | 233         | Distal Intergenic       | 118502035 | 118556525 | Irfngas1 |
| Treg_3_peak_6933  | 5.874       | 8.79695       | 5.52216       | 135         | Distal Intergenic       | 118502035 | 118556525 | Irfngas1 |
| Treg_3_peak_6928  | 4.91099     | 6.86453       | 3.89362       | 113         | Distal Intergenic       | 118502035 | 118556525 | Irfngas1 |
| Treg_3_peak_6930  | 3.65528     | 4.38317       | 1.80968       | 103         | Distal Intergenic       | 118502035 | 118556525 | Irfngas1 |
| Treg_3_peak_6927  | 3.27399     | 4.07351       | 1.6853        | 194         | Distal Intergenic       | 118502035 | 118556525 | Irfngas1 |
| Treg_3_peak_6932  | 3.27399     | 4.07351       | 1.6853        | 117         | Distal Intergenic       | 118502035 | 118556525 | Irfngas1 |
| Treg_3_peak_6931  | 3.4638      | 4.00435       | 1.68449       | 127         | Distal Intergenic       | 118502035 | 118556525 | Irfngas1 |
| Treg_3_peak_6926  | 3.4638      | 4.00435       | 1.68449       | 114         | Intron (ENSMUST0000023) | 118502035 | 118555352 | Irfngas1 |
| Treg_3_peak_6925  | 9.1521      | 14.8555       | 11.0764       | 184         | Intron (ENSMUST0000023) | 118502035 | 118555352 | Irfngas1 |
| Treg_3_peak_6924  | 4.91099     | 6.86453       | 3.89362       | 168         | Intron (ENSMUST0000023) | 118502035 | 118555352 | Irfngas1 |
| Treg_3_peak_4673  | 5.03486     | 7.23294       | 4.1628        | 97          | Distal Intergenic       | 19605919  | 19609256  | Irfngr1  |
| Treg_3_peak_21488 | 4.98017     | 7.17466       | 4.1628        | 246         | Intron (ENSMUST0000002) | 91547147  | 91560649  | Irfngr2  |
| Treg_3_peak_35085 | 5.67657     | 9.2058        | 5.90597       | 120         | Promoter (<=1kb)        | 41767799  | 41769474  | Il11ra1  |
| Treg_3_peak_32251 | 20.9761     | 44.5818       | 39.7466       | 194         | Distal Intergenic       | 68694021  | 68698547  | Il12a    |
| Treg_3_peak_32250 | 7.43667     | 11.7378       | 8.18836       | 136         | Distal Intergenic       | 68694021  | 68698547  | Il12a    |
| Treg_3_peak_32249 | 12.9398     | 23.4361       | 19.1964       | 215         | Promoter (2-3kb)        | 68690644  | 68698547  | Il12a    |
| Treg_3_peak_8041  | 4.79132     | 6.5399        | 3.62572       | 110         | Distal Intergenic       | 44400063  | 44414010  | Il12b    |
| Treg_3_peak_42009 | 3.70959     | 4.40186       | 1.82607       | 97          | Intron (ENSMUST0000001) | 67292018  | 67376188  | Il12rb2  |
| Treg_3_peak_42007 | 3.4638      | 4.00435       | 1.68449       | 127         | Intron (ENSMUST0000011) | 67291318  | 67339694  | Il12rb2  |
| Treg_3_peak_42010 | 7.65907     | 11.738        | 8.18836       | 132         | Promoter (2-3kb)        | 67292018  | 67376188  | Il12rb2  |
| Treg_3_peak_42008 | 4.19571     | 5.73537       | 2.89041       | 223         | Promoter (2-3kb)        | 67291318  | 67339694  | Il12rb2  |
| Treg_3_peak_8256  | 6.4056      | 11.124        | 7.63862       | 157         | Downstream (1-2kb)      | 53631324  | 53634702  | Il13     |
| Treg_3_peak_53055 | 4.09249     | 5.4299        | 2.7156        | 98          | Distal Intergenic       | 36112110  | 36117259  | Il13ra1  |
| Treg_3_peak_53846 | 4.19571     | 5.73537       | 2.89041       | 132         | Distal Intergenic       | 147383478 | 147403832 | Il13ra2  |
| Treg_3_peak_48619 | 4.19571     | 5.73537       | 2.89041       | 159         | Distal Intergenic       | 82331914  | 82344473  | Il15     |
| Treg_3_peak_48621 | 5.72948     | 8.36552       | 5.18008       | 148         | Intron (ENSMUST0000020) | 82331739  | 82345683  | Il15     |
| Treg_3_peak_48620 | 5.72948     | 8.36552       | 5.18008       | 117         | Promoter (<=1kb)        | 82331739  | 82345683  | Il15     |
| Treg_3_peak_27130 | 8.26296     | 13.416        | 9.72605       | 141         | Intron (ENSMUST0000013) | 11723164  | 11733968  | Il15ra   |
| Treg_3_peak_382   | 6.0051      | 8.59188       | 5.38576       | 148         | Distal Intergenic       | 20730905  | 20734496  | Il17a    |
| Treg_3_peak_381   | 4.76947     | 6.37369       | 3.47838       | 140         | Distal Intergenic       | 20730905  | 20734496  | Il17a    |
| Treg_3_peak_16249 | 10.1833     | 17.1861       | 13.2553       | 182         | Distal Intergenic       | 57524777  | 57543166  | Il17d    |
| Treg_3_peak_15623 | 15.1046     | 28.7983       | 24.3496       | 141         | Intron (ENSMUST0000003) | 27067397  | 27100976  | Il17rd   |
| Treg_3_peak_15625 | 8.41695     | 13.3016       | 9.62041       | 161         | Intron (ENSMUST0000003) | 27067397  | 27100976  | Il17rd   |
| Treg_3_peak_15624 | 4.15656     | 5.14039       | 2.50004       | 106         | Intron (ENSMUST0000003) | 27067397  | 27100976  | Il17rd   |
| Treg_3_peak_15626 | 8.85717     | 14.2727       | 10.5215       | 117         | Promoter (1-2kb)        | 27067397  | 27100976  | Il17rd   |
| Treg_3_peak_50974 | 9.60816     | 16.4245       | 12.5385       | 176         | Distal Intergenic       | 50575273  | 50581837  | Il18     |
| Treg_3_peak_2859  | 7.36648     | 11.5336       | 8.01027       | 131         | Distal Intergenic       | 130932816 | 130940115 | Il19     |
| Treg_3_peak_2860  | 4.15656     | 5.14039       | 2.50004       | 141         | Distal Intergenic       | 130932816 | 130940115 | Il19     |
| Treg_3_peak_27427 | 5.03486     | 7.23294       | 4.1628        | 131         | Exon (ENSMUST00000057)  | 24186476  | 24193568  | Il1f9    |
| Treg_3_peak_772   | 4.91099     | 6.86453       | 3.89362       | 142         | Distal Intergenic       | 40225080  | 40317257  | Il1r1    |
| Treg_3_peak_773   | 4.19571     | 5.73537       | 2.89041       | 118         | Distal Intergenic       | 40225080  | 40317257  | Il1r1    |
| Treg_3_peak_775   | 6.54798     | 9.9241        | 6.55583       | 186         | Intron (ENSMUST0000002) | 40266657  | 40277178  | Il1r1    |
| Treg_3_peak_776   | 6.66829     | 10.2794       | 6.87692       | 173         | Intron (ENSMUST0000002) | 40266657  | 40277178  | Il1r1    |
| Treg_3_peak_770   | 3.43117     | 3.94307       | 1.64231       | 139         | Distal Intergenic       | 40074079  | 40112136  | Il1r2    |
| Treg_3_peak_20231 | 6.86547     | 11.879        | 8.326         | 135         | Distal Intergenic       | 26581704  | 26725264  | Il1rap   |
| Treg_3_peak_20230 | 4.09249     | 5.4299        | 2.7156        | 115         | Distal Intergenic       | 26581704  | 26725264  | Il1rap   |
| Treg_3_peak_20232 | 8.31312     | 13.0952       | 9.44846       | 168         | Intron (ENSMUST0000009) | 26624156  | 26715068  | Il1rap   |
| Treg_3_peak_20233 | 5.78408     | 8.52349       | 5.32538       | 164         | Intron (ENSMUST0000009) | 26722434  | 26730117  | Il1rap   |
| Treg_3_peak_53408 | 10.0697     | 17.3659       | 13.4112       | 134         | Intron (ENSMUST0000011) | 86747242  | 87890235  | Il1rapl1 |
| Treg_3_peak_53407 | 8.39143     | 13.8094       | 10.0778       | 141         | Intron (ENSMUST0000011) | 86747242  | 87890235  | Il1rapl1 |

|                   |         |         |         |     |                         |           |           |        |
|-------------------|---------|---------|---------|-----|-------------------------|-----------|-----------|--------|
| Treg_3_peak_53766 | 4.19571 | 5.73537 | 2.89041 | 114 | Distal Intergenic       | 137570608 | 138846946 | 1rapl2 |
| Treg_3_peak_31622 | 12.0288 | 21.3264 | 17.1697 | 402 | Distal Intergenic       | 37120523  | 37125959  | 2      |
| Treg_3_peak_31621 | 7.55229 | 12.0912 | 8.49257 | 134 | Promoter (<=1kb)        | 37120523  | 37125959  | 2      |
| Treg_3_peak_2858  | 4.75144 | 6.43742 | 3.52783 | 147 | Distal Intergenic       | 130906985 | 130911451 | 20     |
| Treg_3_peak_4678  | 4.19571 | 5.73537 | 2.89041 | 154 | Distal Intergenic       | 19712570  | 19760053  | 20ra   |
| Treg_3_peak_4679  | 5.2804  | 7.10905 | 4.11776 | 111 | Promoter (1-2kb)        | 19712634  | 19755824  | 20ra   |
| Treg_3_peak_52084 | 6.9276  | 10.2656 | 6.86394 | 133 | Promoter (2-3kb)        | 100458530 | 100461735 | 20rb   |
| Treg_3_peak_36999 | 9.32579 | 19.199  | 15.1372 | 194 | Distal Intergenic       | 135728172 | 135752140 | 22ra1  |
| Treg_3_peak_37000 | 13.6848 | 24.9583 | 20.6477 | 220 | Intron (ENSMUST0000010) | 135728172 | 135752140 | 22ra1  |
| Treg_3_peak_4674  | 5.03486 | 7.23294 | 4.1628  | 180 | Intron (ENSMUST0000003) | 19621998  | 19634681  | 22ra2  |
| Treg_3_peak_4675  | 4.75144 | 6.43742 | 3.52783 | 109 | Intron (ENSMUST0000003) | 19621998  | 19634681  | 22ra2  |
| Treg_3_peak_42014 | 12.2775 | 22.0188 | 17.8354 | 150 | Intron (ENSMUST0000011) | 67422932  | 67491855  | 23r    |
| Treg_3_peak_27129 | 8.40714 | 13.6879 | 9.98886 | 136 | Promoter (2-3kb)        | 11642807  | 11693193  | 2ra    |
| Treg_3_peak_19107 | 5.82573 | 8.5202  | 5.32538 | 120 | Intron (ENSMUST0000008) | 78481324  | 78493756  | 2rb    |
| Treg_3_peak_8279  | 5.72948 | 8.36552 | 5.18008 | 112 | Distal Intergenic       | 54265303  | 54267277  | 3      |
| Treg_3_peak_8278  | 4.95778 | 6.9994  | 4.0125  | 56  | Distal Intergenic       | 54265303  | 54267277  | 3      |
| Treg_3_peak_39917 | 6.00438 | 9.0871  | 5.79161 | 146 | Intron (ENSMUST0000019) | 123480401 | 123489489 | 31     |
| Treg_3_peak_15009 | 3.70959 | 4.40186 | 1.82607 | 245 | Intron (ENSMUST0000022) | 112525846 | 112532344 | 31ra   |
| Treg_3_peak_15010 | 4.19571 | 5.73537 | 2.89041 | 219 | Promoter (1-2kb)        | 112546319 | 112565666 | 31ra   |
| Treg_3_peak_15011 | 5.03486 | 7.23294 | 4.1628  | 113 | Promoter (2-3kb)        | 112522795 | 112580662 | 31ra   |
| Treg_3_peak_26181 | 5.03486 | 7.23294 | 4.1628  | 172 | Distal Intergenic       | 29951816  | 29952813  | 33     |
| Treg_3_peak_26180 | 3.35657 | 4.31618 | 1.74912 | 116 | Promoter (<=1kb)        | 29951816  | 29952813  | 33     |
| Treg_3_peak_8255  | 6.38717 | 10.0147 | 6.64294 | 184 | Distal Intergenic       | 53612460  | 53618669  | 4      |
| Treg_3_peak_8254  | 5.43291 | 8.17514 | 5.03677 | 135 | Distal Intergenic       | 53612460  | 53618669  | 4      |
| Treg_3_peak_8258  | 5.00122 | 7.12916 | 4.13687 | 111 | Distal Intergenic       | 53720794  | 53725106  | 5      |
| Treg_3_peak_42920 | 5.03486 | 7.23294 | 4.1628  | 189 | Intron (ENSMUST0000020) | 106711975 | 106745109 | 5ra    |
| Treg_3_peak_32703 | 7.43667 | 11.7378 | 8.18836 | 387 | Distal Intergenic       | 89864059  | 89913196  | 6ra    |
| Treg_3_peak_15008 | 5.8383  | 9.46841 | 6.15325 | 122 | Distal Intergenic       | 112464070 | 112510086 | 6st    |
| Treg_3_peak_30957 | 7.36648 | 11.5336 | 8.01027 | 128 | Distal Intergenic       | 7573182   | 7613760   | 7      |
| Treg_3_peak_30958 | 7.01413 | 10.4366 | 6.98562 | 155 | Distal Intergenic       | 7573182   | 7613760   | 7      |
| Treg_3_peak_30956 | 5.03486 | 7.23294 | 4.1628  | 148 | Intron (ENSMUST0000018) | 7573182   | 7613760   | 7      |
| Treg_3_peak_17745 | 4.84932 | 6.34217 | 3.44919 | 187 | Distal Intergenic       | 9516409   | 9530176   | 7r     |
| Treg_3_peak_6410  | 5.874   | 8.79695 | 5.52216 | 153 | Distal Intergenic       | 95387667  | 95392967  | Socs2  |
| Treg_3_peak_6411  | 5.72948 | 8.36552 | 5.18008 | 172 | Distal Intergenic       | 95387667  | 95392967  | Socs2  |
| Treg_3_peak_6412  | 4.07835 | 5.39034 | 2.7156  | 116 | Intron (ENSMUST0000013) | 95388354  | 95412734  | Socs2  |
| Treg_3_peak_25647 | 7.36648 | 11.5336 | 8.01027 | 113 | Intron (ENSMUST0000015) | 88665224  | 88758491  | Socs6  |
| Treg_3_peak_25648 | 4.09249 | 5.4299  | 2.7156  | 141 | Promoter (1-2kb)        | 88665224  | 88758491  | Socs6  |

**Table S10: Mass spectrometry analysis of HDAC8 in effector T cells**

| Gene     | Uniprot  | logFC      | AveExpr    | t          | P.Value  | adj.P.Val | B          |
|----------|----------|------------|------------|------------|----------|-----------|------------|
| Hdac8    | Q8VH37   | 8.85192778 | 0.49991862 | 22.8304362 | 7.69E-09 | 8.73E-06  | 10.4619104 |
| Tbc1d32  | Q3URV1   | -8.7887671 | 0.47925633 | -22.528179 | 8.59E-09 | 8.73E-06  | 10.3820991 |
| Grxcr2   | Q3TYR5   | -7.480524  | 0.22449481 | -18.638069 | 4.09E-08 | 2.77E-05  | 9.17547566 |
| Hipk2    | Q9QZR5   | 7.27246846 | -0.6960613 | 16.5362087 | 1.09E-07 | 3.38E-05  | 8.3529301  |
| Mlycd    | Q99J39   | 5.78719058 | -1.1044241 | 16.1798072 | 1.30E-07 | 3.38E-05  | 8.19880753 |
| Rnf213   | E9Q555   | 5.72705883 | 2.4891938  | 16.8026455 | 9.54E-08 | 3.38E-05  | 8.46519086 |
| Cep43    | Q66JX5   | 5.56778692 | -1.0299836 | 15.6960001 | 1.66E-07 | 3.38E-05  | 7.98204543 |
| Myo1h    | Q9D6A1   | -4.4421816 | -1.4370263 | -15.85433  | 1.53E-07 | 3.38E-05  | 8.05396313 |
| Pak6     | Q3ULB5   | -4.5417699 | -1.6416173 | -16.134756 | 1.33E-07 | 3.38E-05  | 8.17899542 |
| Trpm8    | Q8R4D5   | -7.7135505 | 0.40396411 | -15.95944  | 1.45E-07 | 3.38E-05  | 8.10117601 |
| Ikzf5    | Q8BU00   | 6.99683818 | 0.39500405 | 15.2312807 | 2.12E-07 | 3.92E-05  | 7.76524823 |
| Atad3    | Q92511   | 6.02245498 | 0.9955935  | 14.8991519 | 2.54E-07 | 4.10E-05  | 7.60489595 |
| Ppip5k1  | A2ARP1   | 5.60313141 | -1.025129  | 14.8407919 | 2.62E-07 | 4.10E-05  | 7.57623836 |
| Nfat5    | Q9WV30-2 | 7.2710007  | -0.0687546 | 13.703435  | 4.99E-07 | 5.64E-05  | 6.98724543 |
| Fhod1    | Q6P9Q4   | 4.56093041 | -1.6673361 | 13.929649  | 4.37E-07 | 5.64E-05  | 7.10919469 |
| Mbd3     | Q9ZD8    | 3.86672276 | -1.4774475 | 13.7529365 | 4.85E-07 | 5.64E-05  | 7.01414388 |
| Hip1r    | Q9JKY5   | -3.7548227 | -2.0070911 | -14.038259 | 4.11E-07 | 5.64E-05  | 7.16687081 |
| Mccc2    | Q3ULD5   | -4.2047622 | -0.4415687 | -13.773048 | 4.79E-07 | 5.64E-05  | 7.0250377  |
| Fbxl20   | Q9CZV8   | 5.38987092 | -1.6650425 | 13.089133  | 7.21E-07 | 7.72E-05  | 6.64317754 |
| Sptan1   | P16546   | 3.89852251 | 1.36019298 | 13.0018786 | 7.61E-07 | 7.74E-05  | 6.59271743 |
| Msmo1    | Q9CRA4   | 6.94721682 | -0.301253  | 12.9063107 | 8.07E-07 | 7.82E-05  | 6.53698078 |
| Stambpl1 | Q76N33   | 4.17898307 | -1.9183055 | 12.798661  | 8.63E-07 | 7.94E-05  | 6.47360363 |
| Stom     | P54116   | -4.3401405 | -1.4097818 | -12.736399 | 8.98E-07 | 7.94E-05  | 6.43665743 |
| P18529   | NA       | -7.1183992 | -0.1554083 | -12.667195 | 9.38E-07 | 7.95E-05  | 6.39533906 |
| Stag3    | O70576   | -3.4291087 | -1.9197895 | -12.365266 | 1.14E-06 | 9.25E-05  | 6.2119057  |
| Znf451   | Q8C0P7   | 5.58550578 | -1.4350307 | 11.7998781 | 1.65E-06 | 1.29E-04  | 5.85397917 |
| Sptbn1   | Q62261   | 4.27836658 | -0.060564  | 11.7007789 | 1.77E-06 | 1.33E-04  | 5.78922208 |
| Mau2     | Q9D2X5-2 | 3.76664663 | -1.6812172 | 11.3090726 | 2.31E-06 | 1.62E-04  | 5.52707732 |
| Spata18  | Q0P557   | -5.304239  | -0.8662537 | -11.315437 | 2.30E-06 | 1.62E-04  | 5.53141722 |
| Asf1a    | Q9CQE6   | 5.61247442 | -1.1011746 | 11.1485382 | 2.59E-06 | 1.76E-04  | 5.4167066  |
| Zzef1    | Q5SSH7   | 4.22831977 | -1.4088872 | 10.9515793 | 2.98E-06 | 1.96E-04  | 5.27888221 |
| Otulinl  | Q3TVP5   | 3.65977568 | -2.3781672 | 10.8782433 | 3.14E-06 | 1.99E-04  | 5.22687222 |
| P01652   | NA       | -4.8251136 | 3.51074918 | -10.839316 | 3.23E-06 | 1.99E-04  | 5.1991103  |
| Il2rb    | P16297   | 5.46350051 | -1.5670535 | 10.3731238 | 4.57E-06 | 2.51E-04  | 4.85806457 |
| Sun1     | Q9D666   | 4.60480818 | -1.9482857 | 10.4672432 | 4.25E-06 | 2.51E-04  | 4.92821674 |
| Rere     | Q80TZ9   | 4.50380652 | -1.5096966 | 10.4010207 | 4.47E-06 | 2.51E-04  | 4.87892755 |
| Acot8    | P58137   | -3.5953089 | -2.2017977 | -10.374309 | 4.56E-06 | 2.51E-04  | 4.85895229 |
| Lrrcc1   | Q69ZB0   | 4.63910829 | -2.0930101 | 10.3027886 | 4.82E-06 | 2.58E-04  | 4.80520025 |
| Crtc3    | Q91X84   | 7.9311297  | 0.80157509 | 10.1998388 | 5.21E-06 | 2.67E-04  | 4.72713568 |
| Ipo9     | Q91YE6   | 5.32953092 | -1.452841  | 10.1899966 | 5.25E-06 | 2.67E-04  | 4.71962943 |
| Fuom     | Q8R2K1   | -3.1471251 | -1.8646986 | -10.052349 | 5.84E-06 | 2.90E-04  | 4.61385374 |
| Top2b    | Q64511   | 4.40246116 | -2.0154562 | 9.99685407 | 6.09E-06 | 2.95E-04  | 4.57078302 |
| Hectd3   | Q3U487   | 4.22141274 | -1.4739642 | 9.95844574 | 6.28E-06 | 2.97E-04  | 4.54082896 |
| Fhl3     | Q9R059   | 4.28916195 | -2.0299047 | 9.83598558 | 6.91E-06 | 3.20E-04  | 4.4445257  |
| Znf639   | Q99KZ6   | 7.72771112 | 0.12506901 | 9.65192075 | 8.01E-06 | 3.56E-04  | 4.2974513  |
| Rfc3     | Q8R323   | 4.17284268 | -1.5341965 | 9.64541531 | 8.05E-06 | 3.56E-04  | 4.29220136 |
| Pgm3     | Q9CYR6   | 4.15508683 | -2.4059937 | 9.60499491 | 8.31E-06 | 3.60E-04  | 4.25950158 |
| Rad52    | P43352   | 4.26914185 | -1.1935502 | 9.52299188 | 8.88E-06 | 3.76E-04  | 4.1927345  |
| Exoc7    | O35250   | 2.9803268  | -2.3784448 | 9.45302313 | 9.41E-06 | 3.90E-04  | 4.13530899 |
| Arhgef2  | Q60875   | 5.29728082 | 0.00580801 | 9.38529152 | 9.94E-06 | 4.05E-04  | 4.07931464 |
| Ppp1ca   | P62137   | 2.67670121 | 2.24974429 | 9.01656228 | 1.35E-05 | 5.40E-04  | 3.76732095 |
| Ttc39c   | Q8VE09   | -3.329359  | -2.7718211 | -8.9285308 | 1.46E-05 | 5.71E-04  | 3.69099898 |
| Phf201   | Q8CCJ9   | 4.72321353 | -1.6205695 | 8.75691879 | 1.69E-05 | 6.50E-04  | 3.54011647 |
| Dcun1d1  | Q9QZ73   | 3.0722771  | -2.614304  | 8.69950547 | 1.78E-05 | 6.70E-04  | 3.48900958 |
| Wdr18    | Q4VBE8   | 2.77196926 | -1.6475494 | 8.54602899 | 2.04E-05 | 7.40E-04  | 3.35081455 |
| Paxbp1   | P58501   | 2.53487993 | -3.0517119 | 8.56112242 | 2.01E-05 | 7.40E-04  | 3.36450788 |
| Rfc2     | Q9WUK4   | 6.98750601 | 0.36145969 | 8.38755322 | 2.35E-05 | 8.11E-04  | 3.20566539 |

|          |          |            |            |            |          |            |            |
|----------|----------|------------|------------|------------|----------|------------|------------|
| Kansl2   | Q8BQR4   | 3.94352837 | -2.1368023 | 8.41231556 | 2.30E-05 | 8.11E-04   | 3.228512   |
| Dytn     | A2CI98   | -3.5631469 | -2.3333076 | -8.3856026 | 2.35E-05 | 8.11E-04   | 3.20386307 |
| Adnp     | Q9Z103   | 4.86611299 | -1.803663  | 8.24477293 | 2.67E-05 | 9.07E-04   | 3.0727097  |
| Nipbl    | Q6KCD5   | 3.45600317 | -1.9553394 | 8.00075178 | 3.35E-05 | 0.00111794 | 2.84056086 |
| Eif2b5   | Q8CHW4   | 3.34185881 | -2.8359791 | 7.97600636 | 3.43E-05 | 0.00112576 | 2.81666575 |
| Rfc5     | Q9D0F6   | 4.45488723 | -1.7327107 | 7.8968934  | 3.70E-05 | 0.00115717 | 2.73982693 |
| Pdhx     | Q8BKZ9   | -2.211096  | -0.4379974 | -7.9146692 | 3.64E-05 | 0.00115717 | 2.75715093 |
| Tsc22d4  | Q9EQN3   | -2.771583  | -1.76619   | -7.8967584 | 3.70E-05 | 0.00115717 | 2.73969527 |
| Trpv2    | Q9WTR1   | 3.83260587 | -2.1641477 | 7.65559941 | 4.66E-05 | 0.0014361  | 2.50121682 |
| Nbn      | Q9R207   | 2.39066832 | -3.0827278 | 7.57391012 | 5.05E-05 | 0.00153189 | 2.41895641 |
| Eif2b4   | Q61749   | 4.90804079 | -1.3695495 | 7.53714853 | 5.23E-05 | 0.00155342 | 2.38168932 |
| Znf609   | Q8BZ47   | 3.13559003 | -2.5069696 | 7.52969329 | 5.27E-05 | 0.00155342 | 2.37411265 |
| Gstt3    | Q99L20   | 5.00901017 | -0.5243421 | 7.49141517 | 5.47E-05 | 0.00159006 | 2.3351101  |
| Herc4    | Q6PAV2   | 3.7123998  | -1.3945869 | 7.44409904 | 5.73E-05 | 0.00161997 | 2.28666404 |
| Dlat     | Q8BMF4   | -2.5341084 | 1.96371577 | -7.4552698 | 5.67E-05 | 0.00161997 | 2.29812504 |
| Ablim1   | Q8K4G5   | 2.94043965 | 0.35255523 | 7.41334558 | 5.91E-05 | 0.00164734 | 2.25503639 |
| Pld1     | Q8VCI0   | -2.9531637 | -2.1212998 | -7.1362629 | 7.82E-05 | 0.00214941 | 1.96502733 |
| Mcrs1    | Q99L90   | 3.52189247 | -2.636775  | 7.07311747 | 8.34E-05 | 0.00226101 | 1.89764175 |
| Adh5     | P28474   | 2.12560977 | 2.55135996 | 7.06107482 | 8.45E-05 | 0.00226101 | 1.884735   |
| Lgals3bp | Q07797   | -1.6081203 | -0.9925133 | -6.8911421 | 1.01E-04 | 0.00266362 | 1.70069386 |
| Rfc1     | P35601   | 3.04390342 | -2.2095272 | 6.85895377 | 1.04E-04 | 0.00272008 | 1.6654263  |
| Mrgbp    | Q9DAT2   | 1.99622206 | 1.11766176 | 6.83027502 | 1.08E-04 | 0.00276821 | 1.63389375 |
| Fastkd1  | Q6DI86   | 4.01295616 | -2.4202153 | 6.81787207 | 1.09E-04 | 0.00276888 | 1.6202243  |
| Hcfc1    | Q61191   | 2.10260919 | 0.209372   | 6.80643675 | 1.10E-04 | 0.00276888 | 1.60760396 |
| Cenpx    | Q8C4X1   | 3.03658663 | -2.3167662 | 6.75419608 | 1.17E-04 | 0.00288763 | 1.54973762 |
| Trerf1   | Q8BXJ2   | -3.9124229 | -1.9786062 | -6.7440282 | 1.18E-04 | 0.00288763 | 1.53843418 |
| Ric8a    | Q3TIR3   | 3.69325201 | -2.0853983 | 6.56359009 | 1.43E-04 | 0.00330817 | 1.33562176 |
| Lrpprc   | Q6PB66   | 2.30158066 | -1.1960235 | 6.57562086 | 1.41E-04 | 0.00330817 | 1.34927632 |
| Celf2    | Q9Z0H4   | 1.61092572 | 0.33712672 | 6.57191    | 1.42E-04 | 0.00330817 | 1.34506663 |
| Dhx9     | O70133-2 | -1.7018068 | 1.67139041 | -6.5681448 | 1.42E-04 | 0.00330817 | 1.34079345 |
| Ddx20    | Q9JY4    | -2.1949337 | -2.7964667 | -6.5712732 | 1.42E-04 | 0.00330817 | 1.34434408 |
| Syne3    | Q4FZC9   | 4.05322475 | -1.7110493 | 6.40417919 | 1.70E-04 | 0.00389648 | 1.15288941 |
| Clint1   | Q99KN9   | 4.32444925 | 1.96061751 | 6.38687209 | 1.74E-04 | 0.0039278  | 1.13284666 |
| Rad50    | P70388   | 2.59633866 | -0.0552446 | 6.36014625 | 1.79E-04 | 0.00398798 | 1.10181737 |
| Tardbp   | Q921F2   | 2.47497416 | 3.80567449 | 6.35341348 | 1.80E-04 | 0.00398798 | 1.09398533 |
| Rev1     | Q920Q2   | 3.82259845 | -2.3701735 | 6.32470651 | 1.86E-04 | 0.00407342 | 1.06052268 |
| Btbd9    | Q8C726   | -2.875914  | -3.0737819 | -6.2505759 | 2.02E-04 | 0.00437941 | 0.973595   |
| Kat8     | Q9D1P2   | 1.90558782 | -2.8944791 | 6.17180064 | 2.21E-04 | 0.00473703 | 0.88039936 |
| Snx6     | Q6P8X1   | 2.34198945 | -0.5210728 | 6.14204253 | 2.29E-04 | 0.00484909 | 0.84497198 |
| Supt6h   | Q62383   | 2.89308747 | -2.9970416 | 6.12063693 | 2.35E-04 | 0.00486755 | 0.81941279 |
| Smg1     | Q8BKX6   | -4.1984818 | -1.3674564 | -6.1289501 | 2.32E-04 | 0.00486755 | 0.82934654 |
| Pus1     | A2ADA5   | 2.02888027 | -2.9182288 | 6.10999044 | 2.37E-04 | 0.00487736 | 0.80667683 |
| Eml3     | Q8VC03   | -2.5997629 | -2.2553181 | -6.0640493 | 2.50E-04 | 0.0050897  | 0.75153897 |
| Immt.1   | NA       | -1.5099719 | 0.85231397 | -5.9584795 | 2.83E-04 | 0.00569339 | 0.62372003 |
| Fancc    | P50652   | 3.08894028 | -2.7625273 | 5.92952976 | 2.92E-04 | 0.00583088 | 0.58839569 |
| Ubac2    | Q8R1K1   | 2.8427336  | -1.2155258 | 5.85280019 | 3.20E-04 | 0.00631734 | 0.49419752 |
| Stoml2   | Q99JB2   | -1.4425773 | -0.3904443 | -5.7786145 | 3.49E-04 | 0.00682964 | 0.40232646 |
| Ppp2r1a  | Q76MZ3   | 1.32550765 | 1.1219516  | 5.72311418 | 3.73E-04 | 0.0072264  | 0.33308049 |
| Osbp18   | B9EJ86   | 2.05626452 | -2.8884043 | 5.64877421 | 4.08E-04 | 0.00782528 | 0.23963437 |
| Rbm7     | Q9CQT2   | -1.5498966 | -1.5376811 | -5.6067107 | 4.29E-04 | 0.00815565 | 0.18640609 |
| Diaph1   | O08808   | 1.33212935 | -1.5742745 | 5.55481547 | 4.57E-04 | 0.00856108 | 0.12038267 |
| Tax1bp1  | Q3UKC1   | -2.1702226 | 3.1545518  | -5.5514421 | 4.59E-04 | 0.00856108 | 0.11607733 |
| Babam1   | Q3UI43   | -2.518933  | 0.11493715 | -5.4944978 | 4.92E-04 | 0.00909381 | 0.04315063 |
| Kansl1   | Q80TG1   | 2.9054946  | -1.9384516 | 5.48110212 | 5.00E-04 | 0.00916103 | 0.02592632 |
| Exosc5   | Q9CRA8   | 2.31576464 | -0.2156698 | 5.37933239 | 5.67E-04 | 0.01021334 | -0.1057896 |
| Mccc1    | Q99MR8   | -3.4517419 | -0.7230318 | -5.3784538 | 5.67E-04 | 0.01021334 | -0.1069333 |
| Golga3   | P55937   | -4.0241896 | -1.3051814 | -5.3608545 | 5.80E-04 | 0.0103474  | -0.129868  |
| Clta     | O08585   | 3.95111957 | 3.3046576  | 5.34656735 | 5.90E-04 | 0.01044133 | -0.1485201 |
| Cltc     | Q68FD5   | 3.63789992 | 3.59065047 | 5.24859887 | 6.67E-04 | 0.0116017  | -0.2772311 |

|           |            |            |            |            |            |            |            |
|-----------|------------|------------|------------|------------|------------|------------|------------|
| Mrpl48    | Q8JZS9     | -1.8892536 | -1.5804177 | -5.2538308 | 6.63E-04   | 0.0116017  | -0.2703216 |
| Trmt1l    | A2RSY6     | 1.98302996 | -3.475624  | 5.22540708 | 6.87E-04   | 0.01184452 | -0.3079084 |
| Exoc5     | Q3TPX4     | 2.463025   | -2.6537279 | 5.21184914 | 6.99E-04   | 0.01187238 | -0.3258793 |
| Pan2      | Q8BGF7     | 1.25429937 | -3.8741384 | 5.21023796 | 7.00E-04   | 0.01187238 | -0.3280167 |
| Med13     | Q5SWW4     | 2.01819843 | -3.3366165 | 5.10562966 | 8.00E-04   | 0.013449   | -0.4676165 |
| Cep350    | E9Q309     | 5.09603503 | -0.7186528 | 5.07733316 | 8.30E-04   | 0.01371858 | -0.5056576 |
| Sirt7     | Q8BKJ9     | -1.9108607 | -0.4686099 | -5.0783345 | 8.29E-04   | 0.01371858 | -0.5043094 |
| Hspa1l    | P16627     | 2.04112097 | -0.2851052 | 5.05324651 | 8.56E-04   | 0.01403555 | -0.5381329 |
| Cltb      | Q6IRU5-2   | 4.40761123 | 0.41727229 | 5.03404622 | 8.77E-04   | 0.0141585  | -0.564082  |
| Il2rg     | P34902     | 2.77311303 | -3.0988062 | 5.03903154 | 8.71E-04   | 0.0141585  | -0.5573391 |
| Ehd1      | Q9WVK4     | 5.0625724  | -0.2377201 | 5.01878972 | 8.95E-04   | 0.01419713 | -0.5847402 |
| Pan3      | Q640Q5     | 2.66830166 | -2.6178866 | 5.02017536 | 8.93E-04   | 0.01419713 | -0.5828625 |
| Hdac1     | O09106     | 1.66800175 | 2.97680644 | 5.0136997  | 9.00E-04   | 0.01419713 | -0.59164   |
| Sbf1      | Q6ZPE2     | 2.90825091 | -1.0867155 | 4.98605659 | 9.33E-04   | 0.01460092 | -0.6291796 |
| Ndufaf6   | A2AIL4     | -2.0684515 | -2.6413733 | -4.9732874 | 9.49E-04   | 0.01473138 | -0.6465586 |
| Fcgr4     | A0A0B4J1G0 | -3.3542076 | -0.3240445 | -4.9037776 | 0.0010387  | 0.0160054  | -0.7415878 |
| Lrrfip1.1 | NA         | 2.58779111 | -2.3245705 | 4.89379383 | 0.00105236 | 0.01609393 | -0.7552961 |
| App1      | Q8K3H0     | -1.7819409 | -2.6584407 | -4.867738  | 0.00108893 | 0.01652892 | -0.7911417 |
| Ccdc9     | Q8VC31     | 2.41530354 | -2.4780213 | 4.8525945  | 0.00111081 | 0.01673623 | -0.8120214 |
| Rif1      | Q6PR54     | 6.39847503 | 1.00767131 | 4.84301329 | 0.0011249  | 0.01680517 | -0.8252494 |
| Aldh16a1  | Q57119     | -2.3334663 | -2.440404  | -4.838298  | 0.00113191 | 0.01680517 | -0.8317645 |
| Isg15     | Q64339     | 1.8522287  | 1.23927358 | 4.81564063 | 0.00116625 | 0.01718945 | -0.8631158 |
| Sfn5      | Q8CBA2     | 1.77348906 | -2.6845301 | 4.80997761 | 0.001175   | 0.01719392 | -0.8709637 |
| Chd4      | Q6PDQ2     | 2.14752361 | -1.1261599 | 4.79588177 | 0.00119711 | 0.01739229 | -0.8905186 |
| Ssh2      | Q5SW75     | 2.95300574 | -2.3771248 | 4.77898939 | 0.0012242  | 0.01765971 | -0.9139919 |
| Arl1      | P61211     | -1.9978526 | 0.58273595 | -4.7644235 | 0.00124809 | 0.01787756 | -0.9342664 |
| Cisd2     | Q9CQB5     | 4.11121218 | -1.5299979 | 4.75542985 | 0.00126309 | 0.01796594 | -0.9468004 |
| Vac14     | Q80WQ2     | -3.0620533 | -1.0884739 | -4.672842  | 0.00141036 | 0.01992131 | -1.0624581 |
| Hdac2     | P70288     | 2.13999814 | -0.9724864 | 4.66309108 | 0.00142894 | 0.02004452 | -1.0761798 |
| Rabif     | Q91X96     | 3.72089534 | -1.9326694 | 4.65549805 | 0.00144359 | 0.02011132 | -1.0868746 |
| Fastkd3   | Q8BSN9     | 5.11201918 | 0.22120142 | 4.63261789 | 0.00148872 | 0.02059902 | -1.1191527 |
| Mtrex     | Q9CZU3     | -1.7222829 | -1.5861578 | -4.6180615 | 0.00151823 | 0.02086536 | -1.139728  |
| Nip7      | Q9CCK8     | 1.41352131 | -3.1672091 | 4.60649021 | 0.00154213 | 0.02105168 | -1.1561062 |
| Nup188    | Q6ZQH8     | 2.9358496  | -2.7491365 | 4.59740847 | 0.00156118 | 0.02116963 | -1.1689743 |
| Dlst      | Q9D2G2     | -1.0603252 | 1.9858495  | -4.5367598 | 0.00169509 | 0.02283318 | -1.2552177 |
| Vps4a     | Q8VEJ9     | 1.11290544 | 0.0654804  | 4.5217174  | 0.00173019 | 0.02315263 | -1.2766912 |
| Zcchc8    | Q9CYA6     | -2.2343366 | -2.3336691 | -4.4878919 | 0.00181201 | 0.02408903 | -1.3250982 |
| Nme3      | Q9WV85     | -2.9004295 | -2.0230074 | -4.479428  | 0.00183313 | 0.02421156 | -1.3372365 |
| Nup210    | Q9QY81     | -1.0874423 | 0.01348324 | -4.4234067 | 0.00197978 | 0.02591625 | -1.4178394 |
| Emg1      | O35130     | -2.5751347 | -1.8553387 | -4.4205197 | 0.00198768 | 0.02591625 | -1.4220055 |
| Rbbp4     | Q60972     | 0.99568407 | 1.51779797 | 4.40226514 | 0.00203838 | 0.026408   | -1.4483749 |
| Mta2      | Q9R190     | 1.72725773 | -2.2156957 | 4.37294658 | 0.00212274 | 0.0273269  | -1.4908264 |
| Trim12a   | Q99PQ1     | 1.65001379 | -0.1041728 | 4.36123909 | 0.00215747 | 0.02759934 | -1.5078123 |
| Jak1      | P52332     | 2.20609339 | -1.5238957 | 4.33801672 | 0.00222819 | 0.02832581 | -1.5415623 |
| Paf1      | Q8K2T8     | 3.07462988 | -2.1889063 | 4.2948264  | 0.00236642 | 0.02970937 | -1.6045351 |
| Samm50    | Q8BGH2     | -1.2820422 | -0.6090978 | -4.2861042 | 0.00239545 | 0.02970937 | -1.6172843 |
| Srrm1     | Q52KI8     | -1.5806458 | -0.6614122 | -4.2883782 | 0.00238784 | 0.02970937 | -1.6139593 |
| Tle3      | Q08122     | -3.1554358 | -0.6738031 | -4.2921388 | 0.00237533 | 0.02970937 | -1.6084624 |
| Rfc4      | Q99J62     | 3.41048855 | -1.2236705 | 4.26805209 | 0.00245673 | 0.0302848  | -1.6437044 |
| Nrbp1     | Q99J45     | -3.7612486 | -0.3008711 | -4.2608523 | 0.00248164 | 0.03040759 | -1.6542544 |
| Mvp       | Q9EQK5     | -2.0693647 | -2.5320949 | -4.2145676 | 0.00264841 | 0.03225666 | -1.7222481 |
| Acat2     | Q8CAY6     | 2.779663   | -1.2065374 | 4.16568722 | 0.00283767 | 0.03435608 | -1.7943757 |
| Zmym2     | Q9CU65     | 3.00257594 | -2.9271533 | 4.15821082 | 0.00286788 | 0.03451633 | -1.8054366 |
| Prkcd     | P28867     | 2.39467003 | -2.0033868 | 4.14675181 | 0.00291484 | 0.03487523 | -1.8224044 |
| Esco1     | Q69Z69     | 2.27694356 | -2.7780904 | 4.12403382 | 0.00301041 | 0.03559987 | -1.8560962 |
| Dbt       | P53395     | -2.297218  | 0.53432344 | -4.1251851 | 0.00300549 | 0.03559987 | -1.854387  |
| Pak1ip1   | Q9DCE5     | -1.8993874 | -2.2168287 | -4.1102572 | 0.00307    | 0.03609466 | -1.8765615 |
| Rbbp7     | Q60973     | 0.88194719 | 1.68703609 | 4.10500862 | 0.00309303 | 0.03615646 | -1.8843649 |
| Ipo7      | Q9EPL8     | 2.23660643 | -2.2565615 | 4.07112478 | 0.00324625 | 0.0375341  | -1.9348315 |

|         |        |            |            |            |            |            |            |
|---------|--------|------------|------------|------------|------------|------------|------------|
| Gsdma   | Q9EST1 | -1.9315638 | -2.6653518 | -4.0668305 | 0.00326624 | 0.0375341  | -1.9412382 |
| Traf5   | P70191 | -1.9359766 | -3.6721905 | -4.0680735 | 0.00326044 | 0.0375341  | -1.9393836 |
| Fxr1    | Q61584 | 2.99575374 | -1.6154838 | 4.03321791 | 0.00342735 | 0.03895431 | -1.9914702 |
| Smchd1  | Q6P5D8 | -1.6344579 | -2.3499417 | -4.0330582 | 0.00342813 | 0.03895431 | -1.9917092 |
| Ptgr3   | Q8BGC4 | 2.16275926 | -2.4375413 | 4.00396669 | 0.00357447 | 0.04018992 | -2.0353048 |
| Chchd3  | Q9CRB9 | -1.230215  | 1.61937354 | -4.0035942 | 0.00357639 | 0.04018992 | -2.0358636 |
| Ctps2   | P70303 | 1.01188303 | 0.31351885 | 3.99572199 | 0.00361715 | 0.04042465 | -2.04768   |
| Ppp1r2  | Q9DCL8 | 2.04846733 | -3.2356105 | 3.98719257 | 0.00366188 | 0.04070086 | -2.0604919 |
| Hacd3   | Q8K2C9 | 1.02004618 | -0.880819  | 3.97923518 | 0.00370414 | 0.04084222 | -2.0724529 |
| Jup     | Q02257 | -1.5092863 | 0.87820655 | -3.977251  | 0.00371475 | 0.04084222 | -2.0754367 |
| Stard9  | Q80TF6 | -1.8365765 | -2.4338377 | -3.9635285 | 0.00378909 | 0.0414355  | -2.0960861 |
| Purb    | O35295 | 2.00113832 | -2.1115627 | 3.94262206 | 0.0039054  | 0.04229857 | -2.1275919 |
| Ndufa10 | Q99LC3 | 1.19990572 | 0.41458847 | 3.93907562 | 0.00392551 | 0.04229857 | -2.1329418 |
| Cad     | B2RQC6 | -1.2840243 | 0.85850501 | -3.9345735 | 0.00395119 | 0.04229857 | -2.1397357 |
| Mrpl45  | Q9D0Q7 | -2.0650574 | -2.375484  | -3.9354126 | 0.00394639 | 0.04229857 | -2.1384693 |
| Camk2d  | Q6PHZ2 | -2.3903924 | -0.441749  | -3.929244  | 0.00398183 | 0.04240337 | -2.1477816 |
| Pccb    | Q99MN9 | -2.0429246 | -2.3171645 | -3.9158596 | 0.00405989 | 0.04300949 | -2.1680033 |
| Tap1    | P21958 | 1.22192031 | -1.8038739 | 3.89239496 | 0.00420072 | 0.04409349 | -2.2035089 |
| Cand1   | Q6ZQ38 | 0.90629349 | 0.76636965 | 3.89160055 | 0.00420557 | 0.04409349 | -2.2047122 |
| Lef1    | P27782 | 0.98087335 | 0.70394509 | 3.85902028 | 0.00441006 | 0.04596266 | -2.2541272 |
| Mrpl55  | Q9CZ83 | -1.3256897 | -0.0809774 | -3.8560766 | 0.00442905 | 0.04596266 | -2.2585984 |
| Fam162a | Q9D6U8 | 1.66479789 | -3.3128755 | 3.8448252  | 0.00450244 | 0.04625234 | -2.2756978 |
| Ncoa5   | Q91W39 | -1.4323683 | -0.709447  | -3.8452311 | 0.00449977 | 0.04625234 | -2.2750806 |
| Sec16a  | E9QAT4 | 1.9021204  | -3.0045495 | 3.80572894 | 0.0047677  | 0.04873119 | -2.3352333 |

**Table S11: Mass spectrometry analysis of HDAC8 in Foxp3+ Treg cells**

| Gene     | Uniprot  | logFC      | AveExpr    | t          | P.Value  | adj.P.Val  | B          |
|----------|----------|------------|------------|------------|----------|------------|------------|
| Tbc1d32  | Q3URV1   | -9.2171103 | 0.58511509 | -21.264038 | 8.36E-09 | 1.12E-05   | 10.1432826 |
| Hdac8    | Q8VH37   | 6.5112272  | -0.5110879 | 18.2308001 | 3.11E-08 | 1.28E-05   | 9.19239834 |
| Nfat5    | Q9WV30-2 | 5.90378586 | -0.446268  | 17.3202126 | 4.80E-08 | 1.28E-05   | 8.85597797 |
| P18529   | NA       | -7.9186305 | -0.3409494 | -17.549278 | 4.29E-08 | 1.28E-05   | 8.9431252  |
| Grxcr2   | Q3TYR5   | -8.1243706 | 0.20147637 | -19.025644 | 2.16E-08 | 1.28E-05   | 9.46531336 |
| Hipk2    | Q9QZR5   | 6.72985129 | -0.499112  | 16.1327016 | 8.76E-08 | 1.95E-05   | 8.37488154 |
| Pkn1     | P70268   | 4.75905633 | -1.3008851 | 15.2062859 | 1.44E-07 | 2.75E-05   | 7.96228317 |
| Fastkd3  | Q8BSN9   | 5.19768198 | -1.1977817 | 13.5959211 | 3.68E-07 | 5.46E-05   | 7.15519633 |
| Smg1     | Q8BKX6   | -4.9348099 | -1.2774477 | -13.606711 | 3.66E-07 | 5.46E-05   | 7.16102369 |
| Rfc2     | Q9WUK4   | 4.58925139 | -1.5100213 | 12.9076987 | 5.68E-07 | 7.57E-05   | 6.77066555 |
| Gstt3    | Q99L20   | 5.73534857 | -0.9877441 | 12.2921418 | 8.51E-07 | 1.03E-04   | 6.40408237 |
| Rif1     | Q6PR54   | 6.62442235 | -0.8139971 | 11.9768522 | 1.06E-06 | 1.17E-04   | 6.20744132 |
| Ii2rb    | P16297   | 5.01355123 | -1.1278094 | 11.5833812 | 1.39E-06 | 1.32E-04   | 5.95310444 |
| Myo1h    | Q9D6A1   | -5.2239267 | -1.4813609 | -11.648022 | 1.33E-06 | 1.32E-04   | 5.99558852 |
| Add3     | Q9QYB5   | 4.07107079 | -1.9321136 | 10.240341  | 3.80E-06 | 3.38E-04   | 5.00296814 |
| Sptan1   | P16546   | 4.53999418 | 0.88085507 | 10.0286051 | 4.50E-06 | 3.65E-04   | 4.84052383 |
| Fhl3     | Q9R059   | 4.42105398 | -1.6021185 | 9.84967129 | 5.20E-06 | 3.65E-04   | 4.70033627 |
| Wdr18    | Q4VBE8   | 4.04856019 | -2.0927587 | 9.94166624 | 4.83E-06 | 3.65E-04   | 4.77274823 |
| Mccc2    | Q3ULD5   | -3.4075842 | -2.3381211 | -9.85486   | 5.18E-06 | 3.65E-04   | 4.70443959 |
| Ipo9     | Q91YE6   | 4.54468797 | -1.356958  | 9.66365597 | 6.06E-06 | 4.04E-04   | 4.55169745 |
| Znf639   | Q99KZ6   | 6.983813   | -0.5969511 | 9.20079945 | 8.98E-06 | 5.44E-04   | 4.16848254 |
| Rbm7     | Q9CQT2   | -2.9506942 | -2.5936387 | -9.2328654 | 8.73E-06 | 5.44E-04   | 4.19566392 |
| Mlycd    | Q99J39   | 5.23183545 | -1.6075918 | 9.05437272 | 1.02E-05 | 5.91E-04   | 4.04312807 |
| Sptbn1   | Q62261   | 4.37139647 | 0.2211007  | 8.96699671 | 1.10E-05 | 6.07E-04   | 3.96735037 |
| Ppip5k1  | A2ARP1   | 3.8473939  | -1.6258978 | 8.93020012 | 1.14E-05 | 6.07E-04   | 3.93521701 |
| Hip1r    | Q9JKY5   | -2.9983238 | -2.682695  | -8.8160009 | 1.26E-05 | 6.43E-04   | 3.83464607 |
| Stag3    | O70576   | -3.268442  | -2.1515763 | -8.7798821 | 1.30E-05 | 6.43E-04   | 3.80256934 |
| Mtmr3    | Q8K296   | -3.3523058 | -2.561703  | -8.5702838 | 1.57E-05 | 7.50E-04   | 3.61383869 |
| Cep43    | Q66JX5   | 3.97692839 | -1.9419724 | 8.51366462 | 1.66E-05 | 7.63E-04   | 3.56208775 |
| Ikzf5    | Q8BU00   | 4.21272613 | -1.2658958 | 8.37163179 | 1.89E-05 | 8.42E-04   | 3.4307995  |
| Herc4    | Q6PAV2   | 5.32225639 | -1.8611514 | 8.1765932  | 2.28E-05 | 9.49E-04   | 3.24703016 |
| Eprs1    | Q8CGC7   | -2.8267388 | -1.7956409 | -8.1965115 | 2.23E-05 | 9.49E-04   | 3.26598534 |
| Fbxl20   | Q9CZV8   | 3.8817575  | -1.8561179 | 7.90727751 | 2.95E-05 | 0.00115782 | 2.98644989 |
| Prkd2    | Q8BZ03   | -3.106049  | -2.2851675 | -7.9372297 | 2.87E-05 | 0.00115782 | 3.01583001 |
| Strn     | O55106   | -2.8086373 | -2.3358745 | -7.8107036 | 3.24E-05 | 0.00123675 | 2.89102757 |
| Skap1    | Q3UUUV5  | -3.0721301 | -3.0955055 | -7.6683481 | 3.74E-05 | 0.00138532 | 2.74841658 |
| Pycr3    | Q9DCC4   | -2.8365138 | -2.7060895 | -7.4733265 | 4.55E-05 | 0.0016419  | 2.5491888  |
| Aldh2    | P47738   | -3.4832907 | -2.1179884 | -7.4200823 | 4.81E-05 | 0.00168832 | 2.49400738 |
| Cad      | B2RQC6   | -2.1586255 | 0.14650222 | -7.1219359 | 6.56E-05 | 0.00224514 | 2.17860139 |
| Mccc1    | Q99MR8   | -3.2078766 | -2.3733947 | -7.01856   | 7.33E-05 | 0.00241039 | 2.066648   |
| Pak6     | Q3ULB5   | -4.3796554 | -1.6098034 | -7.0083482 | 7.41E-05 | 0.00241039 | 2.05551512 |
| Top2b    | Q64511   | 2.65223375 | -2.2487796 | 6.97445745 | 7.68E-05 | 0.00241095 | 2.01847165 |
| Ranbp2   | Q9ERU9   | -3.1510811 | -2.488014  | -6.9637941 | 7.77E-05 | 0.00241095 | 2.00678587 |
| Vars1    | Q9Z1Q9   | -2.06824   | -0.6763276 | -6.9286732 | 8.07E-05 | 0.00244714 | 1.96819385 |
| Ckb      | Q04447   | 3.67497379 | 0.46407987 | 6.88590431 | 8.45E-05 | 0.00250622 | 1.92098254 |
| Cops3    | O88543   | -3.1140619 | -1.6001112 | -6.811883  | 9.16E-05 | 0.00265771 | 1.83871004 |
| Atad3    | Q92511   | 5.5146529  | 1.35704851 | 6.78061243 | 9.48E-05 | 0.00269185 | 1.80373804 |
| Hspa1b   | P17879   | 3.67241899 | -0.2566687 | 6.68630276 | 1.05E-04 | 0.00271191 | 1.69748304 |
| Eif2b5   | Q8CHW4   | 2.88352356 | -2.9048711 | 6.68226444 | 1.06E-04 | 0.00271191 | 1.69290686 |
| Dock10   | Q8BZN6   | -2.5071902 | -2.573146  | -6.6849863 | 1.05E-04 | 0.00271191 | 1.69599153 |
| Hpf1     | Q8CFE2   | -3.2819349 | -2.6720283 | -6.7529739 | 9.78E-05 | 0.00271191 | 1.77272085 |
| Camk2d   | Q6PHZ2   | -3.5861593 | -1.6049668 | -6.7112671 | 1.02E-04 | 0.00271191 | 1.7257242  |
| NARS1    | Q8BP47   | -2.7011565 | -2.1757469 | -6.5968693 | 1.16E-04 | 0.00292633 | 1.59562692 |
| Rad52    | P43352   | 2.62781716 | -2.2995915 | 6.50776711 | 1.29E-04 | 0.00311713 | 1.49307617 |
| Ubash3a  | Q3V3E1   | -3.611197  | -2.437163  | -6.5135316 | 1.28E-04 | 0.00311713 | 1.49974335 |
| Fhod1    | Q6P9Q4   | 3.49642423 | -2.5007409 | 6.41931506 | 1.42E-04 | 0.00332548 | 1.39020433 |
| Aldh16a1 | Q57119   | -2.0961532 | -2.5317996 | -6.4247469 | 1.41E-04 | 0.00332548 | 1.39655263 |

|          |          |            |            |            |            |             |            |
|----------|----------|------------|------------|------------|------------|-------------|------------|
| Dytn     | A2CI98   | -3.0248328 | -1.978599  | -6.3809539 | 1.48E-04   | 0.00341463  | 1.34525533 |
| Uck1     | P52623   | -2.0323174 | -3.2827573 | -6.0844933 | 2.10E-04   | 0.00473989  | 0.99095967 |
| Ogdh     | Q60597   | -2.1161285 | -0.1343181 | -5.9570434 | 2.44E-04   | 0.00542478  | 0.83481632 |
| Nup210   | Q9QY81   | -2.0731104 | -1.1762274 | -5.81998   | 2.88E-04   | 0.00629675  | 0.66427845 |
| Hspa1l   | P16627   | 3.9566946  | 0.32858234 | 5.69615537 | 3.35E-04   | 0.00721028  | 0.50785492 |
| Snx6     | Q6P8X1   | 2.93629081 | -1.7107014 | 5.66249403 | 3.49E-04   | 0.00739728  | 0.46494174 |
| Pgm3     | Q9CYR6   | 2.51591936 | -2.3164289 | 5.63340208 | 3.62E-04   | 0.00754923  | 0.42771898 |
| Zzef1    | Q5SSH7   | 2.22673873 | -2.9751936 | 5.50212801 | 4.27E-04   | 0.00858733  | 0.25819361 |
| P01753   | NA       | -2.4222609 | 1.22509541 | -5.4938742 | 4.31E-04   | 0.00858733  | 0.24744907 |
| Dbt      | P53395   | -3.0006093 | -1.3510696 | -5.5086079 | 4.23E-04   | 0.00858733  | 0.26662186 |
| Flna     | Q8BTM8   | -1.5845116 | 1.30965062 | -5.4443747 | 4.59E-04   | 0.00900768  | 0.18279832 |
| Dera     | Q91YP3   | -2.5011601 | -1.9441655 | -5.394876  | 4.89E-04   | 0.00934206  | 0.11778198 |
| Uqcrb    | Q9D855   | -3.0221008 | -2.6588726 | -5.3929199 | 4.90E-04   | 0.00934206  | 0.11520512 |
| Ablim1   | Q8K4G5   | 2.47132632 | -1.5815901 | 5.27531836 | 5.70E-04   | 0.0107112   | -0.0407739 |
| Adh5     | P28474   | 1.81465853 | 1.66464741 | 5.2551347  | 5.85E-04   | 0.01084177  | -0.0677534 |
| Dlst     | Q9D2G2   | -1.3533533 | 1.97565435 | -5.1395295 | 6.80E-04   | 0.01243147  | -0.2234668 |
| Hcfc1    | Q61191   | 1.47527342 | -0.200427  | 5.09891561 | 7.18E-04   | 0.01293571  | -0.2786503 |
| Plrg1    | Q922V4   | -1.4540781 | -2.7985984 | -5.0746221 | 7.41E-04   | 0.01317871  | -0.3117778 |
| Arhgef1  | Q61210-5 | -1.9285331 | -1.7668988 | -4.9806306 | 8.39E-04   | 0.01473309  | -0.4407872 |
| Zcchc8   | Q9CYA6   | -2.0353739 | -2.5894452 | -4.9133359 | 9.18E-04   | 0.01591265  | -0.5339724 |
| Me2      | Q99KE1   | 1.68877919 | 0.39628313 | 4.87899665 | 9.62E-04   | 0.01645181  | -0.5817861 |
| Chchd3   | Q9CRB9   | -1.5887198 | -0.183773  | -4.8370308 | 0.00101809 | 0.01676709  | -0.6404597 |
| Polr2b   | Q8CFI7   | -2.2477415 | -2.4290096 | -4.8448844 | 0.00100732 | 0.01676709  | -0.6294592 |
| Nat10    | Q8K224   | -2.6846396 | -2.4992497 | -4.8465653 | 0.00100503 | 0.01676709  | -0.627106  |
| Rars1    | Q9D0I9   | -2.5195233 | -1.8347253 | -4.8002349 | 0.00107023 | 0.01741084  | -0.6921227 |
| Tars1    | Q9D0R2   | -1.936486  | -1.335687  | -4.7819443 | 0.00109722 | 0.01763476  | -0.717879  |
| Stom     | P54116   | -4.1226948 | -2.0310758 | -4.7539934 | 0.00113988 | 0.01810235  | -0.7573355 |
| Septin11 | Q8C1B7   | -1.3282799 | -1.3203314 | -4.7385229 | 0.00116426 | 0.01827199  | -0.7792243 |
| Smarb1   | Q9Z0H3   | -2.0548619 | -1.7813746 | -4.7026557 | 0.00122297 | 0.01897023  | -0.8301094 |
| Tmem160  | Q9D938   | -2.3625764 | -3.2821994 | -4.6656089 | 0.00128697 | 0.01973359  | -0.882869  |
| Ppp6r1   | Q7TSI3   | -2.3072515 | -3.3663411 | -4.5824222 | 0.00144422 | 0.02189307  | -1.0020792 |
| Nfkb1    | P25799   | -2.2790234 | -2.578925  | -4.5397638 | 0.00153277 | 0.02297432  | -1.0636061 |
| Ankrd44  | B2RXR6   | -1.6823506 | -2.9432827 | -4.5059037 | 0.00160721 | 0.0238224   | -1.1126327 |
| Rnh1     | Q91VI7   | -1.1398905 | -0.2617634 | -4.4470079 | 0.0017461  | 0.02512836  | -1.1983066 |
| Nop56    | Q9D6Z1   | -2.2463694 | -1.3325496 | -4.4554078 | 0.00172553 | 0.02512836  | -1.1860567 |
| Mcm7     | Q61881   | -4.4653859 | -2.0861558 | -4.4446882 | 0.00175183 | 0.02512836  | -1.2016913 |
| Igtp     | Q9DCE9   | -1.6583707 | -2.5583047 | -4.3789901 | 0.00192271 | 0.02728616  | -1.2978729 |
| Msmo1    | Q9CRA4   | 4.32618867 | -0.6749881 | 4.31707678 | 0.00210019 | 0.0285883   | -1.3890777 |
| Snx2     | Q9CWK8   | 2.91942059 | -1.2290442 | 4.33557609 | 0.00204539 | 0.0285883   | -1.3617694 |
| Evl      | P70429   | -1.675071  | -1.5177607 | -4.3217349 | 0.00208625 | 0.0285883   | -1.3821969 |
| Paics    | Q9DCL9   | -2.4594089 | -1.7032983 | -4.3212378 | 0.00208773 | 0.0285883   | -1.3829311 |
| Eef1e1   | Q9D1M4   | -1.2187241 | -2.1360067 | -4.3087213 | 0.00212545 | 0.02863997  | -1.4014278 |
| Prmt5    | Q8CIG8   | -2.7808355 | -1.7860408 | -4.2999852 | 0.00215222 | 0.0287106   | -1.414351  |
| Eif3d    | O70194   | -2.9043207 | -1.5598194 | -4.2767923 | 0.00222504 | 0.02938813  | -1.4487115 |
| Hectd3   | Q3U487   | 2.2081946  | -2.43698   | 4.23334968 | 0.00236863 | 0.03097793  | -1.5132745 |
| Caprin1  | Q60865   | -2.2617794 | -2.6809251 | -4.0904714 | 0.00291509 | 0.0377547   | -1.7274388 |
| Septin7  | O55131   | -1.5506679 | 0.43591036 | -4.0823263 | 0.00295005 | 0.03784013  | -1.7397304 |
| Mthfd1l  | Q3V3R1   | -1.164332  | -0.6756065 | -4.0129769 | 0.00326648 | 0.04149982  | -1.8447368 |
| Sumo2    | P61957   | 1.90755238 | -0.8978    | 3.96989898 | 0.00348108 | 0.04339967  | -1.9102768 |
| Gbp2     | Q9Z0E6   | -3.3262855 | -1.6868169 | -3.9742904 | 0.00345853 | 0.04339967  | -1.9035847 |
| Dhx15    | O35286   | -1.052466  | 0.52919883 | -3.908498  | 0.00381327 | 0.047110096 | -2.004099  |
| Dpysl2   | O08553   | -1.4271247 | 0.02892789 | -3.8816942 | 0.0039687  | 0.04812951  | -2.0452022 |
| Arhgap45 | Q3TBD2   | -1.8173176 | -0.223951  | -3.8834412 | 0.00395837 | 0.04812951  | -2.0425207 |
| Dars1    | Q922B2   | -1.1216214 | 0.56195581 | -3.8581262 | 0.00411093 | 0.04896408  | -2.0814156 |
| Mvp      | Q9EQK5   | -1.6196985 | -2.674093  | -3.8601746 | 0.00409835 | 0.04896408  | -2.0782655 |

**Table S12: Antibodies used in this study**

| <b>Protein targets</b>             | <b>Assays</b>  | <b>Company and product code</b>       |
|------------------------------------|----------------|---------------------------------------|
| <b>Socs3</b>                       | WB             | Cell Signaling Technology #52113      |
| <b>HDAC8</b>                       | WB/ChIP        | Cell Signaling Technology #66042      |
| <b>p-HDAC8</b>                     | WB             | Thermo Fisher Scientific # PA5-105031 |
| <b>Ace-SMC3</b>                    | WB             | Thermo Fisher Scientific #65728       |
| <b>p-ERK</b>                       | WB             | Cell Signaling Technology #4370       |
| <b>p-p38</b>                       | WB             | Cell Signaling Technology #4511       |
| <b>p-LCK</b>                       | WB             | Cell Signaling Technology #70926      |
| <b>p-AKT</b>                       | WB             | Cell Signaling Technology #4060       |
| <b>p-Zap70</b>                     | WB             | Cell Signaling Technology #2717       |
| <b>p-SLP76</b>                     | WB             | Cell Signaling Technology #76384      |
| <b>H3K27ac</b>                     | ChIP           | Cell Signaling Technology #8173       |
| <b>β-Actin</b>                     | WB             | Cell Signaling Technology #8457       |
| <b>Goat anti-rabbit IgG</b>        | WB             | Cell Signaling Technology #7074       |
| <b>Pacific Blue anti-CD4</b>       | Flow cytometry | BD Biosciences #558107                |
| <b>FITC anti-CD8a</b>              | Flow cytometry | Thermo Fisher Scientific #11-0087-42  |
| <b>FITC anti-CD25</b>              | Flow cytometry | BD Biosciences #553072                |
| <b>Alexa Fluor™ 700 anti-Ki-67</b> | Flow cytometry | Thermo Fisher Scientific #56-5698-82  |
| <b>PE-Cyanine 5.5 anti-Foxp3</b>   | Flow cytometry | Thermo Fisher Scientific #35-5773-82  |
| <b>APC anti-IL-2</b>               | Flow cytometry | Thermo Fisher Scientific # 17-7021-82 |
| <b>PE anti-IFN-γ</b>               | Flow cytometry | BioLegend # 505808                    |
| <b>Alexa Fluor™ 700 anti-IFN-γ</b> | Flow cytometry | Thermo Fisher Scientific # 56-7311-82 |

**Table S13: The number of cells for each cell subset per flow cytometry**

| <b>Fig.1f: Flow cytometric analysis of cell numbers in TC-1 tumors from CD4-Cre and HDAC8<sup>-/-</sup> groups</b> |         |       |      |                      |       |       |
|--------------------------------------------------------------------------------------------------------------------|---------|-------|------|----------------------|-------|-------|
|                                                                                                                    | CD4-Cre |       |      | HDAC8 <sup>-/-</sup> |       |       |
| <b>CD4</b>                                                                                                         | 3484    | 5680  | 2744 | 12416                | 18720 | 14520 |
| <b>CD8</b>                                                                                                         | 8040    | 12496 | 6272 | 18236                | 24960 | 20592 |

| <b>Fig.1g: Flow cytometric analysis of cell numbers of IFN<math>\gamma</math> expression by CD4/CD8+ T cells within TC-1 tumors in CD4-Cre and HDAC8<sup>-/-</sup> groups</b> |         |      |      |                      |       |       |
|-------------------------------------------------------------------------------------------------------------------------------------------------------------------------------|---------|------|------|----------------------|-------|-------|
|                                                                                                                                                                               | CD4-Cre |      |      | HDAC8 <sup>-/-</sup> |       |       |
| <b>CD4+IFN<math>\gamma</math>+</b>                                                                                                                                            | 1578    | 2885 | 1413 | 7797                 | 11194 | 9031  |
| <b>CD8+IFN<math>\gamma</math>+</b>                                                                                                                                            | 5008    | 8234 | 4001 | 14497                | 18769 | 14846 |

| <b>Fig.2b: Flow cytometric analysis of cell numbers of CD4/CD8+ T cells within HCC tumors in DMSO and HDAC8i groups(10 days)</b> |       |       |       |        |       |       |
|----------------------------------------------------------------------------------------------------------------------------------|-------|-------|-------|--------|-------|-------|
|                                                                                                                                  | DMSO  |       |       | HDAC8i |       |       |
| <b>CD4</b>                                                                                                                       | 53676 | 49588 | 44748 | 37706  | 45920 | 45342 |
| <b>CD8</b>                                                                                                                       | 23643 | 26059 | 20988 | 33516  | 65520 | 35838 |
| <b>CD4+CD25+</b>                                                                                                                 | 6656  | 4949  | 2381  | 2289   | 2177  | 2231  |
| <b>CD4+Foxp3+</b>                                                                                                                | 1487  | 988   | 1782  | 1231   | 967   | 850   |

| <b>Fig.2c: Flow cytometric analysis of cell numbers of CD4/CD8+ T cells within HCC tumors in DMSO and HDAC8i groups(21 days)</b> |       |       |       |        |       |       |
|----------------------------------------------------------------------------------------------------------------------------------|-------|-------|-------|--------|-------|-------|
|                                                                                                                                  | DMSO  |       |       | HDAC8i |       |       |
| <b>CD4</b>                                                                                                                       | 19511 | 4509  | 69560 | 52160  | 98604 | 48146 |
| <b>CD8</b>                                                                                                                       | 43164 | 38105 | 57152 | 84353  | 97235 | 81450 |
| <b>CD4+CD25+</b>                                                                                                                 | 6263  | 1551  | 13286 | 19091  | 34413 | 15022 |
| <b>CD4+Foxp3+</b>                                                                                                                | 755   | 985   | 538   | 340    | 3878  | 745   |

| <b>Fig.3a: Flow cytometric analysis of cell numbers of Ki-67, IL-2 and IFN-<math>\gamma</math> T cells within HCC tumors in DMSO and HDAC8i groups(10 days)</b> |       |       |       |        |       |       |
|-----------------------------------------------------------------------------------------------------------------------------------------------------------------|-------|-------|-------|--------|-------|-------|
|                                                                                                                                                                 | DMSO  |       |       | HDAC8i |       |       |
| <b>Ki-67 in CD4+ T cells</b>                                                                                                                                    | 27003 | 21902 | 17295 | 45758  | 21066 | 21177 |
| <b>Ki-67 in CD8+ T cells</b>                                                                                                                                    | 7827  | 5339  | 8251  | 6063   | 3542  | 3442  |
| <b>IL-2 in CD4+ T cells</b>                                                                                                                                     | 263   | 608   | 609   | 270    | 379   | 257   |
| <b>IL-2 in CD8+ T cells</b>                                                                                                                                     | 271   | 341   | 334   | 328    | 242   | 361   |
| <b>IFN-<math>\gamma</math> in CD4+ T cells</b>                                                                                                                  | 3127  | 2268  | 2898  | 2978   | 982   | 1418  |
| <b>IFN-<math>\gamma</math> in CD8+ T cells</b>                                                                                                                  | 149   | 168   | 118   | 67     | 154   | 65    |

| <b>Fig.3b: Flow cytometric analysis of cell numbers of Ki-67, IL-2 and IFN-<math>\gamma</math>+ T cells within HCC tumors in DMSO and HDAC8i groups(21 days)</b> |      |      |      |        |       |      |
|------------------------------------------------------------------------------------------------------------------------------------------------------------------|------|------|------|--------|-------|------|
|                                                                                                                                                                  | DMSO |      |      | HDAC8i |       |      |
| Ki-67 in CD4+ T cells                                                                                                                                            | 3521 | 2704 | 2920 | 1081   | 3523  | 918  |
| Ki-67 in CD8+ T cells                                                                                                                                            | 2819 | 3159 | 1914 | 1486   | 11175 | 1637 |
| IL-2 in CD4+ T cells                                                                                                                                             | 1492 | 1627 | 406  | 1647   | 1694  | 2926 |
| IL-2 in CD8+ T cells                                                                                                                                             | 1590 | 1841 | 1794 | 2385   | 1058  | 3996 |
| IFN- $\gamma$ in CD4+ T cells                                                                                                                                    | 761  | 734  | 219  | 1169   | 1325  | 2035 |
| IFN- $\gamma$ in CD8+ T cells                                                                                                                                    | 1018 | 1523 | 828  | 901    | 449   | 1916 |

| <b>Fig.4a: Flow cytometric analysis of cell numbers of CD4+CD25+ and CD8+CD25+ T cells in CD4-Cre and HDAC8<sup>-/-</sup> groups</b> |         |       |            |                      |            |        |
|--------------------------------------------------------------------------------------------------------------------------------------|---------|-------|------------|----------------------|------------|--------|
|                                                                                                                                      | CD4-Cre |       |            | HDAC8 <sup>-/-</sup> |            |        |
| CD4+CD25+ T cells                                                                                                                    | 81411   | 88953 | 14547<br>6 | 296140               | 18042<br>9 | 145143 |
| CD8+CD25+ T cells                                                                                                                    | 43887   | 41471 | 63489      | 158722               | 82152      | 61912  |

| <b>Fig.4c: Flow cytometric analysis of cell numbers of CD4+IL-2+ T cells in CD4-Cre and HDAC8<sup>-/-</sup> groups</b> |            |            |            |                      |            |        |
|------------------------------------------------------------------------------------------------------------------------|------------|------------|------------|----------------------|------------|--------|
|                                                                                                                        | CD4-Cre    |            |            | HDAC8 <sup>-/-</sup> |            |        |
| CD4+IL-2(Fresh)                                                                                                        | 15639      | 17116      | 18231      | 127636               | 75179      | 79211  |
| CD4+IL-2(PMA/ion 4h)                                                                                                   | 19281<br>5 | 23864<br>0 | 32041<br>6 | 118159<br>9          | 62586<br>3 | 618693 |

| <b>Fig.4d-e: Flow cytometric analysis of cell numbers of IL-2+ T cells in CD4-Cre and HDAC8<sup>-/-</sup> groups</b> |         |      |      |                      |       |        |
|----------------------------------------------------------------------------------------------------------------------|---------|------|------|----------------------|-------|--------|
|                                                                                                                      | CD4-Cre |      |      | HDAC8 <sup>-/-</sup> |       |        |
| CD4+IFN $\gamma$ (Treg)                                                                                              | 181     | 329  | 392  | 5235                 | 5232  | 3284.4 |
| CD4+IFN $\gamma$ (Teff)                                                                                              | 226     | 408  | 313  | 4633                 | 4380  | 3141.6 |
| CD8+IFN $\gamma$                                                                                                     | 2490    | 3731 | 2720 | 11881                | 10176 | 9765   |

| <b>Fig.6a: The stability of Foxp3 in lymph nodes and spleen was analyzed by flow cytometry 10 days after CD4-Cre and HDAC8<sup>-/-</sup> Treg cells were injected into immunodeficient Rag1<sup>-/-</sup> mice (n=3/group)</b> |         |        |        |                      |        |        |
|--------------------------------------------------------------------------------------------------------------------------------------------------------------------------------------------------------------------------------|---------|--------|--------|----------------------|--------|--------|
|                                                                                                                                                                                                                                | CD4-Cre |        |        | HDAC8 <sup>-/-</sup> |        |        |
| CD4+Foxp3+(LN)                                                                                                                                                                                                                 | 206018  | 144296 | 144775 | 152404               | 99172  | 120868 |
| CD4+Foxp3+(SP)                                                                                                                                                                                                                 | 191084  | 257961 | 111860 | 121334               | 108709 | 51060  |

| <b>Fig.6b: Flow cytometry was used to analyze Foxp3 within pooled (n=3/group) Treg cells from lymph nodes and spleens of CD4-Cre and HDAC8<sup>-/-</sup> mice, as indicated (CD3/CD28 stimulation 24 h)</b> |         |          |        |                      |          |        |
|-------------------------------------------------------------------------------------------------------------------------------------------------------------------------------------------------------------|---------|----------|--------|----------------------|----------|--------|
|                                                                                                                                                                                                             | CD4-Cre |          |        | HDAC8 <sup>-/-</sup> |          |        |
| CD4+Foxp3+(0h)                                                                                                                                                                                              | 182965  | 179310   | 193758 | 188985               | 198036.5 | 183180 |
| CD4+Foxp3+(24h)                                                                                                                                                                                             | 161035  | 165571.5 | 149210 | 112015               | 97610    | 115240 |

| Fig. S1: Conditional knockout of HDAC8 has negligible effects on T cell development. |             |         |         |                      |         |         |
|--------------------------------------------------------------------------------------|-------------|---------|---------|----------------------|---------|---------|
|                                                                                      | Lymph nodes |         |         |                      |         |         |
| Group                                                                                | CD4-Cre     |         |         | HDAC8 <sup>-/-</sup> |         |         |
| CD4+ T cells                                                                         | 1511395     | 1192556 | 1796754 | 1653718              | 2149616 | 2989350 |
| CD8+ T cells                                                                         | 2274290     | 1556785 | 2571825 | 1634489              | 1760252 | 2212119 |
| CD4+CD25+ T cells                                                                    | 190436      | 132374  | 166739  | 188524               | 211092  | 334807  |
| CD4+Foxp3+ T cells                                                                   | 198713      | 129122  | 177150  | 194750               | 232117  | 336477  |
| Foxp3+Ki-67+                                                                         | 23846       | 24404   | 36493   | 43624                | 44566   | 98588   |
| CD4+Ki-67+                                                                           | 186096      | 131448  | 175336  | 188204               | 264964  | 409624  |
| CD8+Ki-67+                                                                           | 153667      | 109735  | 212885  | 78264                | 122978  | 128439  |
| CD4+CD69+                                                                            | 175322      | 143107  | 206627  | 234828               | 270852  | 388616  |
| CD8+CD69+                                                                            | 221971      | 160349  | 233522  | 148738               | 154198  | 205285  |
| CD4+CD44+CD62L-                                                                      | 90986       | 70957   | 110321  | 114437               | 124678  | 188030  |
| CD8+CD44+CD62L-                                                                      | 90062       | 62116   | 129106  | 56553                | 91885   | 98439   |
|                                                                                      | Spleen      |         |         |                      |         |         |
|                                                                                      | CD4-Cre     |         |         | HDAC8 <sup>-/-</sup> |         |         |
| CD4+ T cells                                                                         | 4300156     | 4555431 | 6286342 | 6103082              | 6617638 | 7794909 |
| CD8+ T cells                                                                         | 4409482     | 3973158 | 5837317 | 3614599              | 3933036 | 4061296 |
| CD4+CD25+ T cells                                                                    | 481617      | 417733  | 588402  | 671339               | 681617  | 787286  |
| CD4+Foxp3+ T cells                                                                   | 572069      | 640402  | 653730  | 785836               | 707118  | 763219  |
| Foxp3+Ki-67+                                                                         | 89815       | 104385  | 72564   | 113160               | 65479   | 106851  |
| CD4+Ki-67+                                                                           | 559722      | 792440  | 704891  | 733447               | 920473  | 947209  |
| CD8+Ki-67+                                                                           | 278785      | 395720  | 440167  | 300477               | 400736  | 229232  |
| CD4+CD69+                                                                            | 411525      | 642316  | 491592  | 707957               | 620734  | 622034  |
| CD8+CD69+                                                                            | 146836      | 137471  | 165196  | 260251               | 314643  | 235149  |
| CD4+CD44+CD62L-                                                                      | 915933      | 1179857 | 1307559 | 1440327              | 1343380 | 1520007 |
| CD8+CD44+CD62L-                                                                      | 440948      | 480752  | 723827  | 437367               | 668616  | 592949  |
|                                                                                      | Thymus      |         |         |                      |         |         |
|                                                                                      | CD4-Cre     |         |         | HDAC8 <sup>-/-</sup> |         |         |
| CD4+ T cells                                                                         | 6800112     | 4785178 | 5613294 | 6007949              | 9428932 | 7629518 |
| CD8+ T cells                                                                         | 1520402     | 790884  | 1168982 | 1493238              | 2343540 | 1759601 |
| CD4+CD25+ T cells                                                                    | 201283      | 69864   | 221164  | 112349               | 236666  | 204471  |
| CD4+Foxp3+ T cells                                                                   | 44548       | 28946   | 47718   | 37544                | 94159   | 57022   |
| Foxp3+Ki-67+                                                                         | 6058        | 1931    | 9162    | 3942                 | 7241    | 5702    |
| CD4+Ki-67+                                                                           | 966632      | 792031  | 793861  | 762216               | 1336826 | 1090635 |
| CD8+Ki-67+                                                                           | 35201       | 54902   | 58502   | 16067                | 93996   | 69223   |
| CD4+CD69+                                                                            | 5392489     | 3713298 | 4400822 | 4523985              | 7128273 | 5577178 |
| CD8+CD69+                                                                            | 588396      | 240429  | 403299  | 530099               | 857735  | 652812  |
| CD4+CD44+CD62L-                                                                      | 248204      | 245480  | 315467  | 326832               | 467675  | 466164  |
| CD8+CD44+CD62L-                                                                      | 86967       | 48718   | 107196  | 61671                | 70541   | 82349   |

| <b>Fig.S2a: Flow cytometric analysis of cell numbers of CD4/CD8+ T cells within HCC spleen in DMSO and HDAC8i groups(10 days)</b> |        |        |        |        |        |        |
|-----------------------------------------------------------------------------------------------------------------------------------|--------|--------|--------|--------|--------|--------|
|                                                                                                                                   | DMSO   |        |        | HDAC8i |        |        |
| <b>CD4</b>                                                                                                                        | 189476 | 196443 | 184470 | 234438 | 252120 | 206079 |
| <b>CD8</b>                                                                                                                        | 98490  | 109135 | 107844 | 123890 | 114600 | 104451 |
| <b>CD4+CD25+</b>                                                                                                                  | 29937  | 25145  | 34127  | 28367  | 26977  | 23905  |
| <b>CD4+Foxp3+</b>                                                                                                                 | 1342   | 980    | 1183   | 434    | 649    | 522    |

| <b>Fig.S2b: Flow cytometric analysis of cell numbers of CD4/CD8+ T cells within HCC spleen in DMSO and HDAC8i groups(21 days)</b> |        |        |        |        |        |        |
|-----------------------------------------------------------------------------------------------------------------------------------|--------|--------|--------|--------|--------|--------|
|                                                                                                                                   | DMSO   |        |        | HDAC8i |        |        |
| <b>CD4</b>                                                                                                                        | 154574 | 142926 | 188395 | 107120 | 233996 | 155568 |
| <b>CD8</b>                                                                                                                        | 58670  | 48388  | 72142  | 50182  | 99736  | 73247  |
| <b>CD4+CD25+</b>                                                                                                                  | 18858  | 21296  | 19970  | 15211  | 28548  | 21468  |
| <b>CD4+Foxp3+</b>                                                                                                                 | 984    | 897    | 905    | 1421   | 2990   | 1033   |

| <b>Fig.S3a: Flow cytometric analysis of cell numbers of Ki-67, IL-2and IFN-<math>\gamma</math>+ T cells within HCC spleen in DMSO and HDAC8i groups(10 days)</b> |       |       |       |        |       |       |
|------------------------------------------------------------------------------------------------------------------------------------------------------------------|-------|-------|-------|--------|-------|-------|
|                                                                                                                                                                  | DMSO  |       |       | HDAC8i |       |       |
| <b>Ki-67 in CD4+ T cells</b>                                                                                                                                     | 27788 | 23203 | 26995 | 15702  | 17986 | 18248 |
| <b>Ki-67 in CD8+ T cells</b>                                                                                                                                     | 11281 | 8307  | 7835  | 4564   | 5367  | 5649  |
| <b>IL-2 in CD4+ T cells</b>                                                                                                                                      | 4459  | 7468  | 5059  | 9621   | 5853  | 5828  |
| <b>IL-2 in CD8+ T cells</b>                                                                                                                                      | 1302  | 1562  | 1200  | 1842   | 1242  | 1280  |
| <b>IFN-<math>\gamma</math> in CD4+ T cells</b>                                                                                                                   | 899   | 922   | 750   | 1122   | 906   | 890   |
| <b>IFN-<math>\gamma</math> in CD8+ T cells</b>                                                                                                                   | 1009  | 1163  | 909   | 1051   | 878   | 744   |

| <b>Fig.S3b: Flow cytometric analysis of cell numbers of Ki-67, IL-2and IFN-<math>\gamma</math>+ T cells within HCC spleen in DMSO and HDAC8i groups(21 days)</b> |       |       |       |        |       |       |
|------------------------------------------------------------------------------------------------------------------------------------------------------------------|-------|-------|-------|--------|-------|-------|
|                                                                                                                                                                  | DMSO  |       |       | HDAC8i |       |       |
| <b>Ki-67 in CD4+ T cells</b>                                                                                                                                     | 26187 | 15539 | 21756 | 26050  | 23765 | 18570 |
| <b>Ki-67 in CD8+ T cells</b>                                                                                                                                     | 6148  | 5715  | 4642  | 7681   | 22150 | 6186  |
| <b>IL-2 in CD4+ T cells</b>                                                                                                                                      | 8973  | 6970  | 2935  | 1432   | 6166  | 6829  |
| <b>IL-2 in CD8+ T cells</b>                                                                                                                                      | 3970  | 4543  | 1795  | 759    | 2124  | 2921  |
| <b>IFN-<math>\gamma</math> in CD4+ T cells</b>                                                                                                                   | 3015  | 3050  | 1963  | 1359   | 2943  | 2549  |
| <b>IFN-<math>\gamma</math> in CD8+ T cells</b>                                                                                                                   | 6477  | 8411  | 5409  | 3793   | 6014  | 6873  |

| <b>Fig.S4a: Flow cytometric analysis of cell numbers of CD4/CD8+ T cells within HCC lymph nodes in DMSO and HDAC8i groups(10 days)</b> |        |        |        |        |        |        |
|----------------------------------------------------------------------------------------------------------------------------------------|--------|--------|--------|--------|--------|--------|
|                                                                                                                                        | DMSO   |        |        | HDAC8i |        |        |
| <b>CD4</b>                                                                                                                             | 490896 | 302400 | 409812 | 439760 | 612155 | 541872 |
| <b>CD8</b>                                                                                                                             | 190904 | 132480 | 137566 | 170168 | 185270 | 176490 |
| <b>CD4+CD25+</b>                                                                                                                       | 55471  | 32659  | 40448  | 38743  | 42177  | 36793  |
| <b>CD4+Foxp3+</b>                                                                                                                      | 810    | 416    | 342    | 273    | 271    | 194    |

| <b>Fig.S4b: Flow cytometric analysis of cell numbers of CD4/CD8+ T cells within HCC lymph nodes in DMSO and HDAC8i groups(21 days)</b> |        |        |        |        |        |        |
|----------------------------------------------------------------------------------------------------------------------------------------|--------|--------|--------|--------|--------|--------|
|                                                                                                                                        | DMSO   |        |        | HDAC8i |        |        |
| <b>CD4</b>                                                                                                                             | 558540 | 488796 | 395932 | 561974 | 410975 | 332304 |
| <b>CD8</b>                                                                                                                             | 189711 | 159390 | 145111 | 238791 | 178895 | 140070 |
| <b>CD4+CD25+</b>                                                                                                                       | 44236  | 32945  | 34486  | 43103  | 36906  | 35557  |
| <b>CD4+Foxp3+</b>                                                                                                                      | 1242   | 1170   | 1100   | 975    | 720    | 1584   |

| <b>Fig.S5a: Flow cytometric analysis of cell numbers of Ki-67, IL-2and IFN-<math>\gamma</math>+ T cells within HCC lymph nodes in DMSO and HDAC8i groups(10 days)</b> |       |       |       |        |       |       |
|-----------------------------------------------------------------------------------------------------------------------------------------------------------------------|-------|-------|-------|--------|-------|-------|
|                                                                                                                                                                       | DMSO  |       |       | HDAC8i |       |       |
| <b>Ki-67 in CD4+ T cells</b>                                                                                                                                          | 30665 | 22462 | 18136 | 18246  | 14991 | 16327 |
| <b>Ki-67 in CD8+ T cells</b>                                                                                                                                          | 6865  | 4481  | 3972  | 3009   | 3410  | 2827  |
| <b>IL-2 in CD4+ T cells</b>                                                                                                                                           | 36688 | 11132 | 26070 | 25458  | 29841 | 32907 |
| <b>IL-2 in CD8+ T cells</b>                                                                                                                                           | 2703  | 2604  | 3218  | 2811   | 3122  | 3667  |
| <b>IFN-<math>\gamma</math> in CD4+ T cells</b>                                                                                                                        | 4267  | 1033  | 1560  | 1238   | 2638  | 2003  |
| <b>IFN-<math>\gamma</math> in CD8+ T cells</b>                                                                                                                        | 2413  | 625   | 1905  | 1554   | 1329  | 1834  |

| <b>Fig.S5b: Flow cytometric analysis of cell numbers of Ki-67, IL-2and IFN-<math>\gamma</math>+ T cells within HCC lymph nodes in DMSO and HDAC8i groups(21 days)</b> |       |       |       |        |       |       |
|-----------------------------------------------------------------------------------------------------------------------------------------------------------------------|-------|-------|-------|--------|-------|-------|
|                                                                                                                                                                       | DMSO  |       |       | HDAC8i |       |       |
| <b>Ki-67 in CD4+ T cells</b>                                                                                                                                          | 34902 | 24916 | 31462 | 24153  | 20276 | 28258 |
| <b>Ki-67 in CD8+ T cells</b>                                                                                                                                          | 10704 | 9433  | 10091 | 7988   | 7625  | 13890 |
| <b>IL-2 in CD4+ T cells</b>                                                                                                                                           | 78864 | 70762 | 54174 | 16403  | 24657 | 21921 |
| <b>IL-2 in CD8+ T cells</b>                                                                                                                                           | 26911 | 23293 | 16696 | 2373   | 3009  | 14900 |
| <b>IFN-<math>\gamma</math> in CD4+ T cells</b>                                                                                                                        | 4433  | 5097  | 3902  | 1975   | 3158  | 3581  |
| <b>IFN-<math>\gamma</math> in CD8+ T cells</b>                                                                                                                        | 12843 | 14538 | 13009 | 6176   | 9174  | 11572 |

| <b>Fig.S6b-c: Flow cytometric analysis of cell numbers of CD4/CD8/Foxp3+ T cells within HCC tumors in CD4-Cre and HDAC8<sup>-/-</sup> groups</b> |         |        |        |                      |        |        |
|--------------------------------------------------------------------------------------------------------------------------------------------------|---------|--------|--------|----------------------|--------|--------|
|                                                                                                                                                  | CD4-Cre |        |        | HDAC8 <sup>-/-</sup> |        |        |
| <b>CD4(Tumor)</b>                                                                                                                                | 21952   | 21280  | 13440  | 28224                | 25648  | 35168  |
| <b>CD4(Spleen)</b>                                                                                                                               | 148736  | 150192 | 128352 | 176960               | 176064 | 157136 |
| <b>CD4(Lymph nodes)</b>                                                                                                                          | 288176  | 237776 | 240576 | 291200               | 362208 | 374864 |
| <b>CD8(Tumor)</b>                                                                                                                                | 23968   | 29456  | 16128  | 41552                | 42336  | 32032  |
| <b>CD8(Spleen)</b>                                                                                                                               | 76832   | 74928  | 96208  | 124208               | 123536 | 101472 |
| <b>CD8(Lymph nodes)</b>                                                                                                                          | 317520  | 498624 | 503664 | 346528               | 256928 | 282688 |
| <b>CD4+Foxp3(Tumor)</b>                                                                                                                          | 2432    | 2662   | 1431   | 2266                 | 2216   | 3577   |
| <b>CD4+Foxp3(Spleen)</b>                                                                                                                         | 33480   | 34935  | 24284  | 33941                | 34456  | 26336  |
| <b>CD4+Foxp3(Lymph nodes)</b>                                                                                                                    | 46454   | 25941  | 25669  | 32207                | 52737  | 55367  |

| <b>Fig.S7: Flow cytometric analysis of cell numbers of Ki-67 within CD4/CD8/Foxp3+ T cells in CD4-Cre and HDAC8<sup>-/-</sup> groups</b> |         |       |       |                      |       |       |
|------------------------------------------------------------------------------------------------------------------------------------------|---------|-------|-------|----------------------|-------|-------|
|                                                                                                                                          | CD4-Cre |       |       | HDAC8 <sup>-/-</sup> |       |       |
| <b>Ki-67/CD4(Tumor)</b>                                                                                                                  | 2465    | 5077  | 2148  | 7381                 | 8028  | 15752 |
| <b>Ki-67/CD4(Spleen)</b>                                                                                                                 | 34254   | 35580 | 26081 | 30933                | 29913 | 31082 |
| <b>Ki-67/CD4(Lymph nodes)</b>                                                                                                            | 29769   | 21495 | 23384 | 26587                | 27310 | 26428 |
| <b>Ki-67/CD8(Tumor)</b>                                                                                                                  | 4321    | 14389 | 5772  | 24391                | 26261 | 18998 |
| <b>Ki-67/CD8(Spleen)</b>                                                                                                                 | 12040   | 11427 | 14210 | 25177                | 24238 | 25064 |
| <b>Ki-67/CD8(Lymph nodes)</b>                                                                                                            | 24894   | 38643 | 40343 | 20341                | 16752 | 19279 |
| <b>Ki-67/CD4+Foxp3+(Tumor)</b>                                                                                                           | 410     | 1122  | 382   | 1263                 | 1243  | 1703  |
| <b>Ki-67/CD4+Foxp3+(Spleen)</b>                                                                                                          | 11209   | 11818 | 8463  | 11662                | 11422 | 9002  |
| <b>Ki-67/CD4+Foxp3+(Lymph nodes)</b>                                                                                                     | 8603    | 5199  | 5845  | 6039                 | 7552  | 8421  |
| <b>Ki-67/CD4+Foxp3-(Tumor)</b>                                                                                                           | 1601    | 3549  | 1559  | 5879                 | 6812  | 13963 |
| <b>Ki-67/CD4+Foxp3-(Spleen)</b>                                                                                                          | 22475   | 23236 | 17317 | 18821                | 18013 | 21543 |
| <b>Ki-67/CD4+Foxp3-(Lymph nodes)</b>                                                                                                     | 20546   | 15633 | 16569 | 19865                | 18940 | 17317 |

| <b>Fig.S8: Flow cytometric analysis of cell numbers of IL-2 within CD4/CD8/Foxp3+ T cells in CD4-Cre and HDAC8<sup>-/-</sup> groups</b> |         |       |      |                      |       |       |
|-----------------------------------------------------------------------------------------------------------------------------------------|---------|-------|------|----------------------|-------|-------|
|                                                                                                                                         | CD4-Cre |       |      | HDAC8 <sup>-/-</sup> |       |       |
| <b>IL-2/CD4(Tumor)</b>                                                                                                                  | 134     | 72    | 99   | 541                  | 545   | 580   |
| <b>IL-2/CD4(Spleen)</b>                                                                                                                 | 7090    | 11769 | 9296 | 18442                | 16363 | 18485 |
| <b>IL-2/CD4(Lymph nodes)</b>                                                                                                            | 1192    | 1286  | 1663 | 2112                 | 1755  | 1975  |
| <b>IL-2/CD8(Tumor)</b>                                                                                                                  | 17      | 24    | 15   | 71                   | 215   | 162   |
| <b>IL-2/CD8(Spleen)</b>                                                                                                                 | 2592    | 3699  | 4079 | 7308                 | 6016  | 6714  |
| <b>IL-2/CD8(Lymph nodes)</b>                                                                                                            | 1879    | 2711  | 3415 | 1232                 | 1474  | 1270  |
| <b>IL-2/CD4+Foxp3+(Tumor)</b>                                                                                                           | 9       | 0     | 7    | 177                  | 159   | 138   |
| <b>IL-2/CD4+Foxp3+(Spleen)</b>                                                                                                          | 361     | 1015  | 1499 | 4888                 | 3473  | 3787  |
| <b>IL-2/CD4+Foxp3+(Lymph nodes)</b>                                                                                                     | 137     | 430   | 617  | 63                   | 57    | 120   |
| <b>IL-2/CD4+Foxp3-(Tumor)</b>                                                                                                           | 160     | 88    | 135  | 483                  | 545   | 531   |

|                              |      |      |      |       |       |       |
|------------------------------|------|------|------|-------|-------|-------|
| IL-2/CD4+Foxp3-(Spleen)      | 6667 | 5780 | 7853 | 14724 | 13909 | 15558 |
| IL-2/CD4+Foxp3-(Lymph nodes) | 2473 | 2789 | 2654 | 3188  | 3408  | 3477  |

**Fig.S9: Flow cytometric analysis of cell numbers of IFN $\gamma$  within CD4/CD8/Foxp3+ T cells in CD4-Cre and HDAC8<sup>-/-</sup> groups**

|                                       | CD4-Cre |       |       | HDAC8 <sup>-/-</sup> |       |       |
|---------------------------------------|---------|-------|-------|----------------------|-------|-------|
| IFN $\gamma$ /CD4(Tumor)              | 1864    | 917   | 841   | 1872                 | 3112  | 3005  |
| IFN $\gamma$ /CD4(Spleen)             | 13231   | 12167 | 12464 | 26040                | 21917 | 21863 |
| IFN $\gamma$ /CD4(Lymph nodes)        | 3889    | 4013  | 2978  | 5234                 | 5329  | 4776  |
| IFN $\gamma$ /CD8(Tumor)              | 661     | 394   | 332   | 516                  | 3912  | 3344  |
| IFN $\gamma$ /CD8(Spleen)             | 23442   | 23257 | 25658 | 29958                | 24724 | 24917 |
| IFN $\gamma$ /CD8(Lymph nodes)        | 19389   | 7277  | 7790  | 22177                | 25343 | 21168 |
| IFN $\gamma$ /CD4+Foxp3+(Tumor)       | 0       | 8     | 7     | 130                  | 184   | 192   |
| IFN $\gamma$ /CD4+Foxp3+(Spleen)      | 481     | 239   | 240   | 1175                 | 1002  | 1063  |
| IFN $\gamma$ /CD4+Foxp3+(Lymph nodes) | 638     | 1108  | 865   | 813                  | 1024  | 896   |
| IFN $\gamma$ /CD4+Foxp3-(Tumor)       | 1606    | 805   | 728   | 1425                 | 2585  | 2483  |
| IFN $\gamma$ /CD4+Foxp3-(Spleen)      | 12739   | 11451 | 12229 | 24693                | 20529 | 20488 |
| IFN $\gamma$ /CD4+Foxp3-(Lymph nodes) | 3649    | 3458  | 2654  | 4555                 | 4759  | 4554  |

**Fig.S11: Conditional knockout of HDAC8 impairs the immunosuppressive function of Treg cells in ConA-mediated autoimmune hepatitis(n=3/group)**

|                     | Teff(WT)+Treg(WT)                    |        |        | Teff(WT)+Treg(HDAC8 <sup>-/-</sup> )                    |        |        |
|---------------------|--------------------------------------|--------|--------|---------------------------------------------------------|--------|--------|
| CD4+T cells         | 332800                               | 262000 | 302800 | 340800                                                  | 326000 | 361200 |
| CD4+Foxp3+          | 21299                                | 18733  | 25072  | 19153                                                   | 17669  | 11956  |
| IFN $\gamma$ (Teff) | 24577                                | 30895  | 16414  | 40206                                                   | 33916  | 24307  |
| IFN $\gamma$ (Treg) | 1201                                 | 654    | 677    | 1107                                                    | 1873   | 742    |
| IL-2(Teff)          | 13332                                | 6106   | 8971   | 4664                                                    | 8695   | 21793  |
| IL-2(Treg)          | 109                                  | 0      | 338    | 222                                                     | 134    | 405    |
|                     | Teff(HDAC8 <sup>-/-</sup> )+Treg(WT) |        |        | Teff(HDAC8 <sup>-/-</sup> )+Treg(HDAC8 <sup>-/-</sup> ) |        |        |
| CD4+T cells         | 344800                               | 172800 | 345200 | 373200                                                  | 376800 | 374400 |
| CD4+Foxp3+          | 18654                                | 10558  | 20677  | 29520                                                   | 17823  | 31075  |
| IFN $\gamma$ (Teff) | 16862                                | 5029   | 13241  | 82139                                                   | 59949  | 20496  |
| IFN $\gamma$ (Treg) | 1319                                 | 285    | 744    | 6406                                                    | 3582   | 2467   |
| IL-2(Teff)          | 4599                                 | 3423   | 9379   | 9726                                                    | 14180  | 12634  |
| IL-2(Treg)          | 95                                   | 95     | 372    | 744                                                     | 1130   | 469    |

**Fig.S13a: Flow cytometry analysis of CD4-Cre and HDAC8<sup>-/-</sup> iTreg cells were stimulated with CD3/CD28 beads (1:1) plus TGF- $\beta$  and IL-2 for the indicated times(n=3/group)**

|            | CD4-Cre |        |        | HDAC8 <sup>-/-</sup> |        |        |
|------------|---------|--------|--------|----------------------|--------|--------|
| <b>0h</b>  | 34800   | 27600  | 25500  | 18900                | 21900  | 22400  |
| <b>24h</b> | 259400  | 199000 | 153600 | 251600               | 204000 | 164300 |
| <b>48h</b> | 549700  | 618000 | 661900 | 569100               | 629000 | 670800 |
| <b>72h</b> | 801600  | 735000 | 670400 | 854600               | 783000 | 702200 |

**Table S14: Primers sequences used for real-time PCR and ChIP PCR**

| <b>Target Genes</b>             | <b>Primers sequences used for real-time PCR</b>                  |
|---------------------------------|------------------------------------------------------------------|
| <b>CD4</b>                      | Forward: AGATACCCCAGGTCTCGCTT<br>Reverse: TGCCTGGCGCTGTTGG       |
| <b>CD8</b>                      | Forward: TGAAGTGTTGGGGTCCGTTT<br>Reverse: CATTGCAAACACGCTTTCGG   |
| <b>Foxp3</b>                    | Forward: ATATGCGACCCCCTTTCACC<br>Reverse: TTGGCTCCTCTTCTTGCGAA   |
| <b>Granzyme B</b>               | Forward: GGACATGAAGTCAAGCCCCA<br>Reverse: CCCGAAAGGAAGCACGTTTG   |
| <b>IFN-<math>\gamma</math></b>  | Forward: CGGCACAGTCATTGAAAGCC<br>Reverse: TGCATCCTTTTTTCGCCTTGC  |
| <b>Fas</b>                      | Forward: TGCTTGCTGGCTCACAGTTA<br>Reverse: GAATCACTCCAACGGGCTGA   |
| <b>FasI</b>                     | Forward: AGCAGTCAGCGTCAGAGTTC<br>Reverse: GTACTGGGGTTGGCTCACG    |
| <b>IL-2</b>                     | Forward: TGAGTCAGCAACTGTGGTGG<br>Reverse: GCCCTTGGGGCTTACAAAAG   |
| <b>IL-6</b>                     | Forward: GGGACTGATGCTGGTGACAA<br>Reverse: AGCATTGGAAATTGGGGTAGGA |
| <b>IL-17f</b>                   | Forward: ACGTGAATTCCAGAACCGCT<br>Reverse: TTGGAGATCGGGCTTACAC    |
| <b><math>\beta</math>-Actin</b> | Forward: TGAGCTGCGTTTTACACCCT<br>Reverse: AAGTCAGTGTACAGGCCAGC   |
| <b>Target Genes</b>             | <b>Primers sequences used for ChIP-PCR</b>                       |
| <b>Fas</b>                      | Forward: CCTGAGGCTTCTTCATGGCA<br>Reverse: GTCACCCTCCTTCCTCCT     |
| <b>FasI</b>                     | Forward: CTAGCTGTGAGCACTCTCCC<br>Reverse: AGCTGCAGATGTTTGCCTG    |
| <b>IL-2</b>                     | Forward: TGCAGGAAGTTGTCCAGTCC<br>Reverse: TGGTCCCAGTGTGATGGTG    |
| <b>IL-6</b>                     | Forward: AGACCTTCAAGCCTCCTTGC<br>Reverse: GCATTCTCCCCAGTGGTCTC   |
| <b>IL-17</b>                    | Forward: TGTATTGGCAGTAGCCACCC<br>Reverse: TGCACTGTATCCAGGCAAGG   |
